# Supplementary material for: Plant secondary metabolite-dependent plant-soil feedbacks can improve crop yield in the field
Source: eLife. 2023 Aug 1;12:e84988. doi: 10.7554/eLife.84988 (PMC10393292; doi:10.7554/eLife.84988)
Supplement: Figure 1—source data 1. [file elife-84988-fig1-data1.xlsx]

## Sheet: Figure_1A
compound_name	sample_id	genotype	pos_y	ng_mL
DIMBOA-Glc	WT01	WT	13.5	9.3
DIMBOA-Glc	bx01	bx1	4.5	0
DIMBOA-Glc	WT02	WT	31.5	19
DIMBOA-Glc	bx02	bx1	22.5	0
DIMBOA-Glc	WT03	WT	67.5	2.8
DIMBOA-Glc	bx03	bx1	58.5	0
DIMBOA-Glc	WT04	WT	85.5	0
DIMBOA-Glc	bx04	bx1	76.5	0
DIMBOA-Glc	WT05	WT	49.5	20.3
DIMBOA-Glc	bx05	bx1	40.5	0
DIMBOA-Glc	WT06	WT	67.5	1.3
DIMBOA-Glc	bx06	bx1	58.5	0
DIMBOA-Glc	WT07	WT	13.5	10.5
DIMBOA-Glc	bx07	bx1	4.5	0
DIMBOA-Glc	WT08	WT	31.5	6
DIMBOA-Glc	bx08	bx1	22.5	0
DIMBOA-Glc	WT09	WT	49.5	4.8
DIMBOA-Glc	bx09	bx1	40.5	0
DIMBOA-Glc	WT10	WT	85.5	4.3
DIMBOA-Glc	bx10	bx1	76.5	0
HMBOA	WT01	WT	13.5	358.4
HMBOA	bx01	bx1	4.5	0
HMBOA	WT02	WT	31.5	398.9
HMBOA	bx02	bx1	22.5	0
HMBOA	WT03	WT	67.5	203.3
HMBOA	bx03	bx1	58.5	0
HMBOA	WT04	WT	85.5	595.7
HMBOA	bx04	bx1	76.5	0
HMBOA	WT05	WT	49.5	634.5
HMBOA	bx05	bx1	40.5	0
HMBOA	WT06	WT	67.5	107.7
HMBOA	bx06	bx1	58.5	0
HMBOA	WT07	WT	13.5	152.1
HMBOA	bx07	bx1	4.5	0
HMBOA	WT08	WT	31.5	201.6
HMBOA	bx08	bx1	22.5	0
HMBOA	WT09	WT	49.5	301.6
HMBOA	bx09	bx1	40.5	0
HMBOA	WT10	WT	85.5	168.6
HMBOA	bx10	bx1	76.5	0
DIMBOA	WT01	WT	13.5	10
DIMBOA	bx01	bx1	4.5	0
DIMBOA	WT02	WT	31.5	29.3
DIMBOA	bx02	bx1	22.5	0
DIMBOA	WT03	WT	67.5	3.9
DIMBOA	bx03	bx1	58.5	0
DIMBOA	WT04	WT	85.5	65.8
DIMBOA	bx04	bx1	76.5	0
DIMBOA	WT05	WT	49.5	58.6
DIMBOA	bx05	bx1	40.5	0
DIMBOA	WT06	WT	67.5	1.6
DIMBOA	bx06	bx1	58.5	0
DIMBOA	WT07	WT	13.5	4.9
DIMBOA	bx07	bx1	4.5	0
DIMBOA	WT08	WT	31.5	11.8
DIMBOA	bx08	bx1	22.5	0
DIMBOA	WT09	WT	49.5	16.9
DIMBOA	bx09	bx1	40.5	0
DIMBOA	WT10	WT	85.5	2.3
DIMBOA	bx10	bx1	76.5	0
HDMBOA-Glc	WT01	WT	13.5	517.6
HDMBOA-Glc	bx01	bx1	4.5	0
HDMBOA-Glc	WT02	WT	31.5	381.1
HDMBOA-Glc	bx02	bx1	22.5	0
HDMBOA-Glc	WT03	WT	67.5	366.1
HDMBOA-Glc	bx03	bx1	58.5	0
HDMBOA-Glc	WT04	WT	85.5	650.9
HDMBOA-Glc	bx04	bx1	76.5	0
HDMBOA-Glc	WT05	WT	49.5	479
HDMBOA-Glc	bx05	bx1	40.5	0
HDMBOA-Glc	WT06	WT	67.5	222.9
HDMBOA-Glc	bx06	bx1	58.5	0
HDMBOA-Glc	WT07	WT	13.5	239.9
HDMBOA-Glc	bx07	bx1	4.5	0
HDMBOA-Glc	WT08	WT	31.5	203.8
HDMBOA-Glc	bx08	bx1	22.5	0
HDMBOA-Glc	WT09	WT	49.5	227.1
HDMBOA-Glc	bx09	bx1	40.5	0
HDMBOA-Glc	WT10	WT	85.5	363.8
HDMBOA-Glc	bx10	bx1	76.5	0
MBOA	WT01	WT	13.5	49.2
MBOA	bx01	bx1	4.5	0
MBOA	WT02	WT	31.5	76.3
MBOA	bx02	bx1	22.5	0
MBOA	WT03	WT	67.5	55.6
MBOA	bx03	bx1	58.5	0.8
MBOA	WT04	WT	85.5	104.9
MBOA	bx04	bx1	76.5	0.5
MBOA	WT05	WT	49.5	69.8
MBOA	bx05	bx1	40.5	0.4
MBOA	WT06	WT	67.5	28.8
MBOA	bx06	bx1	58.5	0
MBOA	WT07	WT	13.5	47.7
MBOA	bx07	bx1	4.5	0.7
MBOA	WT08	WT	31.5	43.3
MBOA	bx08	bx1	22.5	0.8
MBOA	WT09	WT	49.5	48
MBOA	bx09	bx1	40.5	0
MBOA	WT10	WT	85.5	67.8
MBOA	bx10	bx1	76.5	0
AMPO	WT01	WT	13.5	0.161971
AMPO	bx01	bx1	4.5	0.0309544
AMPO	WT02	WT	31.5	0.135747
AMPO	bx02	bx1	22.5	0
AMPO	WT03	WT	67.5	0
AMPO	bx03	bx1	58.5	0.0412725
AMPO	WT04	WT	85.5	0.155006
AMPO	bx04	bx1	76.5	0
AMPO	WT05	WT	49.5	0.140997
AMPO	bx05	bx1	40.5	0.0849621
AMPO	WT06	WT	67.5	0.0387774
AMPO	bx06	bx1	58.5	0
AMPO	WT07	WT	13.5	0.0818432
AMPO	bx07	bx1	4.5	0.0949943
AMPO	WT08	WT	31.5	0.103805
AMPO	bx08	bx1	22.5	0
AMPO	WT09	WT	49.5	0.306685
AMPO	bx09	bx1	40.5	0
AMPO	WT10	WT	85.5	0.48846
AMPO	bx10	bx1	76.5	0

## Sheet: Figure_1B
compound_name	sample_id	conditioning	pos_y	ng_mL
DIMBOA-Glc	bx01	bx1	4.5	7.34
DIMBOA-Glc	WT01	WT	13.5	0
DIMBOA-Glc	bx02	bx1	22.5	1.355
DIMBOA-Glc	WT02	WT	31.5	0
DIMBOA-Glc	bx03	bx1	58.5	0.545
DIMBOA-Glc	WT03	WT	67.5	0
DIMBOA-Glc	bx04	bx1	76.5	10.385
DIMBOA-Glc	WT04	WT	85.5	0
DIMBOA-Glc	bx05	bx1	40.5	1.105
DIMBOA-Glc	WT05	WT	49.5	0
DIMBOA-Glc	bx06	bx1	58.5	0.775
DIMBOA-Glc	WT06	WT	67.5	0
DIMBOA-Glc	bx07	bx1	4.5	0.375
DIMBOA-Glc	WT07	WT	13.5	0
DIMBOA-Glc	bx08	bx1	22.5	1.07
DIMBOA-Glc	WT08	WT	31.5	1.125
DIMBOA-Glc	bx09	bx1	40.5	0.46
DIMBOA-Glc	WT09	WT	49.5	0
DIMBOA-Glc	bx10	bx1	76.5	2.46
DIMBOA-Glc	WT10	WT	85.5	0
HMBOA	bx01	bx1	4.5	0.71
HMBOA	WT01	WT	13.5	0.705
HMBOA	bx02	bx1	22.5	0.285
HMBOA	WT02	WT	31.5	38.96
HMBOA	bx03	bx1	58.5	0.45
HMBOA	WT03	WT	67.5	5.285
HMBOA	bx04	bx1	76.5	0.225
HMBOA	WT04	WT	85.5	9.31
HMBOA	bx05	bx1	40.5	0.26
HMBOA	WT05	WT	49.5	2.145
HMBOA	bx06	bx1	58.5	0
HMBOA	WT06	WT	67.5	0.655
HMBOA	bx07	bx1	4.5	0.675
HMBOA	WT07	WT	13.5	4.125
HMBOA	bx08	bx1	22.5	0.355
HMBOA	WT08	WT	31.5	9.595
HMBOA	bx09	bx1	40.5	0.33
HMBOA	WT09	WT	49.5	35.895
HMBOA	bx10	bx1	76.5	0.28
HMBOA	WT10	WT	85.5	23.1
DIMBOA	bx01	bx1	4.5	0
DIMBOA	WT01	WT	13.5	0
DIMBOA	bx02	bx1	22.5	0
DIMBOA	WT02	WT	31.5	0.64
DIMBOA	bx03	bx1	58.5	0
DIMBOA	WT03	WT	67.5	0
DIMBOA	bx04	bx1	76.5	0
DIMBOA	WT04	WT	85.5	0.395
DIMBOA	bx05	bx1	40.5	0
DIMBOA	WT05	WT	49.5	0
DIMBOA	bx06	bx1	58.5	0
DIMBOA	WT06	WT	67.5	0
DIMBOA	bx07	bx1	4.5	0
DIMBOA	WT07	WT	13.5	0
DIMBOA	bx08	bx1	22.5	0
DIMBOA	WT08	WT	31.5	0.305
DIMBOA	bx09	bx1	40.5	0
DIMBOA	WT09	WT	49.5	0.31
DIMBOA	bx10	bx1	76.5	0
DIMBOA	WT10	WT	85.5	0.445
HDMBOA-Glc	bx01	bx1	4.5	2.38
HDMBOA-Glc	WT01	WT	13.5	0
HDMBOA-Glc	bx02	bx1	22.5	0.52
HDMBOA-Glc	WT02	WT	31.5	0
HDMBOA-Glc	bx03	bx1	58.5	0
HDMBOA-Glc	WT03	WT	67.5	0
HDMBOA-Glc	bx04	bx1	76.5	2.175
HDMBOA-Glc	WT04	WT	85.5	0
HDMBOA-Glc	bx05	bx1	40.5	0.455
HDMBOA-Glc	WT05	WT	49.5	0
HDMBOA-Glc	bx06	bx1	58.5	0.405
HDMBOA-Glc	WT06	WT	67.5	0
HDMBOA-Glc	bx07	bx1	4.5	0
HDMBOA-Glc	WT07	WT	13.5	0
HDMBOA-Glc	bx08	bx1	22.5	0.635
HDMBOA-Glc	WT08	WT	31.5	0
HDMBOA-Glc	bx09	bx1	40.5	0
HDMBOA-Glc	WT09	WT	49.5	0
HDMBOA-Glc	bx10	bx1	76.5	0.695
HDMBOA-Glc	WT10	WT	85.5	0.665
MBOA	bx01	bx1	4.5	0.455
MBOA	WT01	WT	13.5	0.695
MBOA	bx02	bx1	22.5	0.365
MBOA	WT02	WT	31.5	11.62
MBOA	bx03	bx1	58.5	0.53
MBOA	WT03	WT	67.5	2.95
MBOA	bx04	bx1	76.5	0.27
MBOA	WT04	WT	85.5	5.61
MBOA	bx05	bx1	40.5	0.39
MBOA	WT05	WT	49.5	1.57
MBOA	bx06	bx1	58.5	0.26
MBOA	WT06	WT	67.5	0.865
MBOA	bx07	bx1	4.5	0.665
MBOA	WT07	WT	13.5	3.035
MBOA	bx08	bx1	22.5	0.4
MBOA	WT08	WT	31.5	7.81
MBOA	bx09	bx1	40.5	0.35
MBOA	WT09	WT	49.5	11.725
MBOA	bx10	bx1	76.5	0.305
MBOA	WT10	WT	85.5	13.9
AMPO	bx01	bx1	4.5	0.2
AMPO	WT01	WT	13.5	0.285
AMPO	bx02	bx1	22.5	0.19
AMPO	WT02	WT	31.5	0.53
AMPO	bx03	bx1	58.5	0.195
AMPO	WT03	WT	67.5	0.305
AMPO	bx04	bx1	76.5	0.18
AMPO	WT04	WT	85.5	0.76
AMPO	bx05	bx1	40.5	0.19
AMPO	WT05	WT	49.5	0.365
AMPO	bx06	bx1	58.5	0.2
AMPO	WT06	WT	67.5	0.295
AMPO	bx07	bx1	4.5	0.195
AMPO	WT07	WT	13.5	0.425
AMPO	bx08	bx1	22.5	0.195
AMPO	WT08	WT	31.5	0.52
AMPO	bx09	bx1	40.5	0.215
AMPO	WT09	WT	49.5	0.575
AMPO	bx10	bx1	76.5	0.205
AMPO	WT10	WT	85.5	0.535

## Sheet: Figure_1C
compound_name	sample_id	wheat_var	conditioning	pos_y	ng_mL
HMBOA	bx01	fiorina	bx1	4.5	1.66
HDMBOA-Glc	bx01	fiorina	bx1	4.5	1.59
MBOA	bx01	fiorina	bx1	4.5	1.36
AMPO	bx01	fiorina	bx1	4.5	0.45
HMBOA	WT01	fiorina	WT	13.5	2.52
HDMBOA-Glc	WT01	fiorina	WT	13.5	4
MBOA	WT01	fiorina	WT	13.5	1.62
AMPO	WT01	fiorina	WT	13.5	0.83
HMBOA	bx02	fiorina	bx1	22.5	19.19
HDMBOA-Glc	bx02	fiorina	bx1	22.5	12.49
MBOA	bx02	fiorina	bx1	22.5	3.69
AMPO	bx02	fiorina	bx1	22.5	NA
HMBOA	WT02	fiorina	WT	31.5	1.83
HDMBOA-Glc	WT02	fiorina	WT	31.5	3.14
MBOA	WT02	fiorina	WT	31.5	1.82
AMPO	WT02	fiorina	WT	31.5	0.56
HMBOA	bx03	fiorina	bx1	40.5	33.59
HDMBOA-Glc	bx03	fiorina	bx1	40.5	8.56
MBOA	bx03	fiorina	bx1	40.5	NA
AMPO	bx03	fiorina	bx1	40.5	0.5
HMBOA	WT03	fiorina	WT	49.5	3.39
HDMBOA-Glc	WT03	fiorina	WT	49.5	3.04
MBOA	WT03	fiorina	WT	49.5	2.47
AMPO	WT03	fiorina	WT	49.5	0.8
HMBOA	bx04	fiorina	bx1	58.5	11.68
HDMBOA-Glc	bx04	fiorina	bx1	58.5	4.67
MBOA	bx04	fiorina	bx1	58.5	3.85
AMPO	bx04	fiorina	bx1	58.5	0.46
HMBOA	WT04	fiorina	WT	67.5	8.23
HDMBOA-Glc	WT04	fiorina	WT	67.5	3.32
MBOA	WT04	fiorina	WT	67.5	4.19
AMPO	WT04	fiorina	WT	67.5	0.76
HMBOA	bx05	fiorina	bx1	76.5	2.85
HDMBOA-Glc	bx05	fiorina	bx1	76.5	5.8
MBOA	bx05	fiorina	bx1	76.5	2.01
AMPO	bx05	fiorina	bx1	76.5	0.5
HMBOA	WT05	fiorina	WT	85.5	15.84
HDMBOA-Glc	WT05	fiorina	WT	85.5	3.18
MBOA	WT05	fiorina	WT	85.5	3.27
AMPO	WT05	fiorina	WT	85.5	0.56
HMBOA	bx06	claro	bx1	4.5	4.79
HDMBOA-Glc	bx06	claro	bx1	4.5	6.53
MBOA	bx06	claro	bx1	4.5	2.48
AMPO	bx06	claro	bx1	4.5	NA
HMBOA	WT06	claro	WT	13.5	11
HDMBOA-Glc	WT06	claro	WT	13.5	7.29
MBOA	WT06	claro	WT	13.5	6.34
AMPO	WT06	claro	WT	13.5	0.94
HMBOA	bx07	claro	bx1	22.5	2.19
HDMBOA-Glc	bx07	claro	bx1	22.5	4.55
MBOA	bx07	claro	bx1	22.5	1.89
AMPO	bx07	claro	bx1	22.5	NA
HMBOA	WT07	claro	WT	31.5	2.71
HDMBOA-Glc	WT07	claro	WT	31.5	12.03
MBOA	WT07	claro	WT	31.5	2.85
AMPO	WT07	claro	WT	31.5	0.82
HMBOA	bx08	claro	bx1	40.5	6.46
HDMBOA-Glc	bx08	claro	bx1	40.5	6.07
MBOA	bx08	claro	bx1	40.5	3.1
AMPO	bx08	claro	bx1	40.5	0.58
HMBOA	WT08	claro	WT	49.5	6.8
HDMBOA-Glc	WT08	claro	WT	49.5	8.57
MBOA	WT08	claro	WT	49.5	3.49
AMPO	WT08	claro	WT	49.5	0.94
HMBOA	bx09	claro	bx1	58.5	5.04
HDMBOA-Glc	bx09	claro	bx1	58.5	11.59
MBOA	bx09	claro	bx1	58.5	3.67
AMPO	bx09	claro	bx1	58.5	0.53
HMBOA	WT09	claro	WT	67.5	8.49
HDMBOA-Glc	WT09	claro	WT	67.5	12.77
MBOA	WT09	claro	WT	67.5	4.67
AMPO	WT09	claro	WT	67.5	0.74
HMBOA	bx10	claro	bx1	76.5	5.73
HDMBOA-Glc	bx10	claro	bx1	76.5	9.65
MBOA	bx10	claro	bx1	76.5	5.17
AMPO	bx10	claro	bx1	76.5	0.51
HMBOA	WT10	claro	WT	85.5	6.74
HDMBOA-Glc	WT10	claro	WT	85.5	22.89
MBOA	WT10	claro	WT	85.5	7.82
AMPO	WT10	claro	WT	85.5	1.15
HMBOA	bx11	fiorina	bx1	4.5	5.95
HDMBOA-Glc	bx11	fiorina	bx1	4.5	10.18
MBOA	bx11	fiorina	bx1	4.5	4.08
AMPO	bx11	fiorina	bx1	4.5	0.5
HMBOA	WT11	fiorina	WT	13.5	11.06
HDMBOA-Glc	WT11	fiorina	WT	13.5	8.18
MBOA	WT11	fiorina	WT	13.5	4.78
AMPO	WT11	fiorina	WT	13.5	0.79
HMBOA	bx12	fiorina	bx1	22.5	24.05
HDMBOA-Glc	bx12	fiorina	bx1	22.5	15.76
MBOA	bx12	fiorina	bx1	22.5	4.13
AMPO	bx12	fiorina	bx1	22.5	0.45
HMBOA	WT12	fiorina	WT	31.5	9.23
HDMBOA-Glc	WT12	fiorina	WT	31.5	3.98
MBOA	WT12	fiorina	WT	31.5	3.56
AMPO	WT12	fiorina	WT	31.5	0.72
HMBOA	bx13	fiorina	bx1	40.5	17.84
HDMBOA-Glc	bx13	fiorina	bx1	40.5	3.92
MBOA	bx13	fiorina	bx1	40.5	3.45
AMPO	bx13	fiorina	bx1	40.5	0.5
HMBOA	WT13	fiorina	WT	49.5	22.25
HDMBOA-Glc	WT13	fiorina	WT	49.5	NA
MBOA	WT13	fiorina	WT	49.5	3.25
AMPO	WT13	fiorina	WT	49.5	0.69
HMBOA	bx14	fiorina	bx1	58.5	12.9
HDMBOA-Glc	bx14	fiorina	bx1	58.5	5.75
MBOA	bx14	fiorina	bx1	58.5	2.79
AMPO	bx14	fiorina	bx1	58.5	0.5
HMBOA	WT14	fiorina	WT	67.5	12.76
HDMBOA-Glc	WT14	fiorina	WT	67.5	10.52
MBOA	WT14	fiorina	WT	67.5	3.55
AMPO	WT14	fiorina	WT	67.5	0.64
HMBOA	bx15	fiorina	bx1	76.5	1.87
HDMBOA-Glc	bx15	fiorina	bx1	76.5	NA
MBOA	bx15	fiorina	bx1	76.5	1.23
AMPO	bx15	fiorina	bx1	76.5	0.48
HMBOA	WT15	fiorina	WT	85.5	2.67
HDMBOA-Glc	WT15	fiorina	WT	85.5	NA
MBOA	WT15	fiorina	WT	85.5	1.68
AMPO	WT15	fiorina	WT	85.5	0.62
HMBOA	bx16	claro	bx1	4.5	NA
HDMBOA-Glc	bx16	claro	bx1	4.5	12.68
MBOA	bx16	claro	bx1	4.5	5.21
AMPO	bx16	claro	bx1	4.5	0.53
HMBOA	WT16	claro	WT	13.5	11.61
HDMBOA-Glc	WT16	claro	WT	13.5	14.22
MBOA	WT16	claro	WT	13.5	6.9
AMPO	WT16	claro	WT	13.5	0.82
HMBOA	bx17	claro	bx1	22.5	5.66
HDMBOA-Glc	bx17	claro	bx1	22.5	6.66
MBOA	bx17	claro	bx1	22.5	1.86
AMPO	bx17	claro	bx1	22.5	0.59
HMBOA	bx18	claro	bx1	40.5	6.34
HDMBOA-Glc	bx18	claro	bx1	40.5	5.44
MBOA	bx18	claro	bx1	40.5	3.18
AMPO	bx18	claro	bx1	40.5	0.6
HMBOA	WT18	claro	WT	49.5	7.53
HDMBOA-Glc	WT18	claro	WT	49.5	5.67
MBOA	WT18	claro	WT	49.5	4.06
AMPO	WT18	claro	WT	49.5	0.86
HMBOA	bx19	claro	bx1	58.5	3.74
HDMBOA-Glc	bx19	claro	bx1	58.5	6.95
MBOA	bx19	claro	bx1	58.5	2.94
AMPO	bx19	claro	bx1	58.5	0.59
HMBOA	WT19	claro	WT	67.5	8.3
HDMBOA-Glc	WT19	claro	WT	67.5	NA
MBOA	WT19	claro	WT	67.5	4.79
AMPO	WT19	claro	WT	67.5	1.22
HMBOA	bx20	claro	bx1	76.5	NA
HDMBOA-Glc	bx20	claro	bx1	76.5	NA
MBOA	bx20	claro	bx1	76.5	6.31
AMPO	bx20	claro	bx1	76.5	NA
HMBOA	WT20	claro	WT	85.5	NA
HDMBOA-Glc	WT20	claro	WT	85.5	20.4
MBOA	WT20	claro	WT	85.5	6.29
AMPO	WT20	claro	WT	85.5	1.18
HMBOA	bx21	sailor	bx1	4.5	3.68
HDMBOA-Glc	bx21	sailor	bx1	4.5	22.98
MBOA	bx21	sailor	bx1	4.5	3.88
AMPO	bx21	sailor	bx1	4.5	0.5
HMBOA	WT21	sailor	WT	13.5	4.64
HDMBOA-Glc	WT21	sailor	WT	13.5	5.73
MBOA	WT21	sailor	WT	13.5	3.68
AMPO	WT21	sailor	WT	13.5	0.67
HMBOA	bx22	sailor	bx1	22.5	4.82
HDMBOA-Glc	bx22	sailor	bx1	22.5	8.98
MBOA	bx22	sailor	bx1	22.5	2.73
AMPO	bx22	sailor	bx1	22.5	0.48
HMBOA	WT22	sailor	WT	31.5	11.94
HDMBOA-Glc	WT22	sailor	WT	31.5	13.54
MBOA	WT22	sailor	WT	31.5	4.93
AMPO	WT22	sailor	WT	31.5	0.6
HMBOA	bx23	sailor	bx1	40.5	6.56
HDMBOA-Glc	bx23	sailor	bx1	40.5	15.65
MBOA	bx23	sailor	bx1	40.5	3.5
AMPO	bx23	sailor	bx1	40.5	0.5
HMBOA	WT23	sailor	WT	49.5	10.68
HDMBOA-Glc	WT23	sailor	WT	49.5	9.91
MBOA	WT23	sailor	WT	49.5	4.06
AMPO	WT23	sailor	WT	49.5	0.94
HMBOA	bx24	sailor	bx1	58.5	4.29
HDMBOA-Glc	bx24	sailor	bx1	58.5	7.17
MBOA	bx24	sailor	bx1	58.5	3.26
AMPO	bx24	sailor	bx1	58.5	0.51
HMBOA	WT24	sailor	WT	67.5	13.47
HDMBOA-Glc	WT24	sailor	WT	67.5	16.61
MBOA	WT24	sailor	WT	67.5	5.86
AMPO	WT24	sailor	WT	67.5	1.09
HMBOA	bx25	sailor	bx1	76.5	5.56
HDMBOA-Glc	bx25	sailor	bx1	76.5	7.82
MBOA	bx25	sailor	bx1	76.5	2.89
AMPO	bx25	sailor	bx1	76.5	0.52
HMBOA	WT25	sailor	WT	85.5	5.46
HDMBOA-Glc	WT25	sailor	WT	85.5	7.29
MBOA	WT25	sailor	WT	85.5	3.66
AMPO	WT25	sailor	WT	85.5	0.7
HMBOA	bx26	sailor	bx1	4.5	19.4
HDMBOA-Glc	bx26	sailor	bx1	4.5	25.35
MBOA	bx26	sailor	bx1	4.5	7.87
AMPO	bx26	sailor	bx1	4.5	0.54
HMBOA	WT26	sailor	WT	13.5	20.03
HDMBOA-Glc	WT26	sailor	WT	13.5	31.72
MBOA	WT26	sailor	WT	13.5	NA
AMPO	WT26	sailor	WT	13.5	0.73
HMBOA	bx27	sailor	bx1	22.5	20.35
HDMBOA-Glc	bx27	sailor	bx1	22.5	17.7
MBOA	bx27	sailor	bx1	22.5	6.12
AMPO	bx27	sailor	bx1	22.5	0.53
HMBOA	WT27	sailor	WT	31.5	12.69
HDMBOA-Glc	WT27	sailor	WT	31.5	13.53
MBOA	WT27	sailor	WT	31.5	5.45
AMPO	WT27	sailor	WT	31.5	0.44
HMBOA	bx28	sailor	bx1	40.5	9.47
HDMBOA-Glc	bx28	sailor	bx1	40.5	13.62
MBOA	bx28	sailor	bx1	40.5	4.13
AMPO	bx28	sailor	bx1	40.5	0.48
HMBOA	WT28	sailor	WT	49.5	NA
HDMBOA-Glc	WT28	sailor	WT	49.5	5.76
MBOA	WT28	sailor	WT	49.5	NA
AMPO	WT28	sailor	WT	49.5	0.71
HMBOA	bx29	sailor	bx1	58.5	34.22
HDMBOA-Glc	bx29	sailor	bx1	58.5	9.94
MBOA	bx29	sailor	bx1	58.5	NA
AMPO	bx29	sailor	bx1	58.5	NA
HMBOA	WT29	sailor	WT	67.5	4.51
HDMBOA-Glc	WT29	sailor	WT	67.5	13.92
MBOA	WT29	sailor	WT	67.5	3.63
AMPO	WT29	sailor	WT	67.5	1.11
HMBOA	bx30	sailor	bx1	76.5	12.09
HDMBOA-Glc	bx30	sailor	bx1	76.5	NA
MBOA	bx30	sailor	bx1	76.5	6.86
AMPO	bx30	sailor	bx1	76.5	0.47
HMBOA	WT30	sailor	WT	85.5	14.14
HDMBOA-Glc	WT30	sailor	WT	85.5	24.34
MBOA	WT30	sailor	WT	85.5	6.63
AMPO	WT30	sailor	WT	85.5	0.74

## Sheet: Fig_1 - fig. sup. 2A
sample_id	genotype	pos_y	dry_weight
bx01_a	bx1	3	211.5
bx01_b	bx1	5.25	186.5
WT01_a	WT	12	192
WT01_b	WT	14.25	200
bx02_a	bx1	21	199.5
bx02_b	bx1	23.25	161.5
WT02_a	WT	30	211
WT02_b	WT	32.25	193.5
bx03_a	bx1	57	177.5
bx03_b	bx1	59.25	192
WT03_a	WT	66	119
WT03_b	WT	68.25	197.5
bx04_a	bx1	75	160.5
bx04_b	bx1	77.25	193
WT04_a	WT	84	163.5
WT04_b	WT	86.25	145.5
bx05_a	bx1	39	195
bx05_b	bx1	41.25	145.5
WT05_a	WT	48	123
WT05_b	WT	50.25	170.5
bx06_a	bx1	57	134.5
bx06_b	bx1	59.25	180
WT06_a	WT	66	131
WT06_b	WT	68.25	191
bx07_a	bx1	3	187
bx07_b	bx1	5.25	203.5
WT07_a	WT	12	194.5
WT07_b	WT	14.25	179.5
bx08_a	bx1	21	161.5
bx08_b	bx1	23.25	203.5
WT08_a	WT	30	176.5
WT08_b	WT	32.25	148.5
bx09_a	bx1	39	233.5
bx09_b	bx1	41.25	232
WT09_a	WT	48	188.5
WT09_b	WT	50.25	171.5
bx10_a	bx1	75	150
bx10_b	bx1	77.25	187
WT10_a	WT	84	149.5
WT10_b	WT	86.25	145

## Sheet: Fig_1 - fig. sup. 2B
sample_id	genotype	pos_y	parameter	quantity
WT01	WT	2	pH	6.68
WT01	WT	2	phosphorus_CO2	13.2
WT01	WT	2	potassium_CO2	1.7
WT01	WT	2	magnesium_CO2	6
WT01	WT	2	nitrate_H2O	33.4
WT01	WT	2	phosphorus_H2O	7.79
WT01	WT	2	potassium_H2O	17.99
WT01	WT	2	calcium_H2O	64.32
WT01	WT	2	magnesium_H2O	7.46
WT01	WT	2	iron_H2O	6.884
WT01	WT	2	phosphorus_AAE	42.67
WT01	WT	2	potassium_AAE	81.7
WT01	WT	2	magnesium_AAE	79.4
WT01	WT	2	manganese_AAE	206
WT01	WT	2	boron_AAE	0.2
WT01	WT	2	copper_AAE	3.4
WT01	WT	2	iron_AAE	192
WT01	WT	2	iron_HNO3	12945.1
WT02	WT	4	pH	7
WT02	WT	4	phosphorus_CO2	17.9
WT02	WT	4	potassium_CO2	2.6
WT02	WT	4	magnesium_CO2	7.8
WT02	WT	4	nitrate_H2O	33.1
WT02	WT	4	phosphorus_H2O	10.13
WT02	WT	4	potassium_H2O	24.31
WT02	WT	4	calcium_H2O	70.08
WT02	WT	4	magnesium_H2O	8.42
WT02	WT	4	iron_H2O	7.036
WT02	WT	4	phosphorus_AAE	50.6
WT02	WT	4	potassium_AAE	107.3
WT02	WT	4	magnesium_AAE	96.2
WT02	WT	4	manganese_AAE	217
WT02	WT	4	boron_AAE	0.1
WT02	WT	4	copper_AAE	4.7
WT02	WT	4	iron_AAE	217
WT02	WT	4	iron_HNO3	13751.9
WT03	WT	6	pH	6.79
WT03	WT	6	phosphorus_CO2	10.4
WT03	WT	6	potassium_CO2	1.4
WT03	WT	6	magnesium_CO2	6.1
WT03	WT	6	nitrate_H2O	33.27
WT03	WT	6	phosphorus_H2O	5.1
WT03	WT	6	potassium_H2O	13.67
WT03	WT	6	calcium_H2O	72.31
WT03	WT	6	magnesium_H2O	7.36
WT03	WT	6	iron_H2O	8.123
WT03	WT	6	phosphorus_AAE	34.98
WT03	WT	6	potassium_AAE	78.61
WT03	WT	6	magnesium_AAE	86.6
WT03	WT	6	manganese_AAE	247
WT03	WT	6	boron_AAE	0.2
WT03	WT	6	copper_AAE	3.6
WT03	WT	6	iron_AAE	198
WT03	WT	6	iron_HNO3	14380.4
WT04	WT	8	pH	6.73
WT04	WT	8	phosphorus_CO2	10.2
WT04	WT	8	potassium_CO2	1.3
WT04	WT	8	magnesium_CO2	5.4
WT04	WT	8	nitrate_H2O	37.77
WT04	WT	8	phosphorus_H2O	7.07
WT04	WT	8	potassium_H2O	15.09
WT04	WT	8	calcium_H2O	75.93
WT04	WT	8	magnesium_H2O	7.25
WT04	WT	8	iron_H2O	6.714
WT04	WT	8	phosphorus_AAE	34.6
WT04	WT	8	potassium_AAE	67.54
WT04	WT	8	magnesium_AAE	76.9
WT04	WT	8	manganese_AAE	191
WT04	WT	8	boron_AAE	0.1
WT04	WT	8	copper_AAE	3.6
WT04	WT	8	iron_AAE	184
WT04	WT	8	iron_HNO3	13437.9
bx01	bx1	1	pH	6.39
bx01	bx1	1	phosphorus_CO2	7.9
bx01	bx1	1	potassium_CO2	1.2
bx01	bx1	1	magnesium_CO2	6.6
bx01	bx1	1	nitrate_H2O	28.81
bx01	bx1	1	phosphorus_H2O	5.53
bx01	bx1	1	potassium_H2O	13.32
bx01	bx1	1	calcium_H2O	53.73
bx01	bx1	1	magnesium_H2O	7.62
bx01	bx1	1	iron_H2O	6.418
bx01	bx1	1	phosphorus_AAE	28
bx01	bx1	1	potassium_AAE	58.45
bx01	bx1	1	magnesium_AAE	87.5
bx01	bx1	1	manganese_AAE	189
bx01	bx1	1	boron_AAE	0.1
bx01	bx1	1	copper_AAE	3.9
bx01	bx1	1	iron_AAE	186
bx01	bx1	1	iron_HNO3	12338.6
bx02	bx1	3	pH	6.66
bx02	bx1	3	phosphorus_CO2	16.3
bx02	bx1	3	potassium_CO2	1.7
bx02	bx1	3	magnesium_CO2	7.1
bx02	bx1	3	nitrate_H2O	34.31
bx02	bx1	3	phosphorus_H2O	8.49
bx02	bx1	3	potassium_H2O	17.27
bx02	bx1	3	calcium_H2O	75.02
bx02	bx1	3	magnesium_H2O	8.29
bx02	bx1	3	iron_H2O	5.601
bx02	bx1	3	phosphorus_AAE	51.86
bx02	bx1	3	potassium_AAE	83.59
bx02	bx1	3	magnesium_AAE	88.7
bx02	bx1	3	manganese_AAE	226
bx02	bx1	3	boron_AAE	0.2
bx02	bx1	3	copper_AAE	4.5
bx02	bx1	3	iron_AAE	209
bx02	bx1	3	iron_HNO3
bx03	bx1	5	pH	7.1
bx03	bx1	5	phosphorus_CO2	18.6
bx03	bx1	5	potassium_CO2	1.9
bx03	bx1	5	magnesium_CO2	6.3
bx03	bx1	5	nitrate_H2O	36.08
bx03	bx1	5	phosphorus_H2O	9.44
bx03	bx1	5	potassium_H2O	19.82
bx03	bx1	5	calcium_H2O	79.8
bx03	bx1	5	magnesium_H2O	8.26
bx03	bx1	5	iron_H2O	8.289
bx03	bx1	5	phosphorus_AAE	63.59
bx03	bx1	5	potassium_AAE	86.17
bx03	bx1	5	magnesium_AAE	89.65
bx03	bx1	5	manganese_AAE	265
bx03	bx1	5	boron_AAE	0.1
bx03	bx1	5	copper_AAE	4.5
bx03	bx1	5	iron_AAE	241
bx03	bx1	5	iron_HNO3	13730.2
bx04	bx1	7	pH	6.85
bx04	bx1	7	phosphorus_CO2	6.9
bx04	bx1	7	potassium_CO2	1
bx04	bx1	7	magnesium_CO2	5.6
bx04	bx1	7	nitrate_H2O	30.11
bx04	bx1	7	phosphorus_H2O	4.57
bx04	bx1	7	potassium_H2O	11.43
bx04	bx1	7	calcium_H2O	58.87
bx04	bx1	7	magnesium_H2O	6.71
bx04	bx1	7	iron_H2O	8.518
bx04	bx1	7	phosphorus_AAE	26.19
bx04	bx1	7	potassium_AAE	58.93
bx04	bx1	7	magnesium_AAE	77.8
bx04	bx1	7	manganese_AAE	200
bx04	bx1	7	boron_AAE	0.1
bx04	bx1	7	copper_AAE	3.5
bx04	bx1	7	iron_AAE	173
bx04	bx1	7	iron_HNO3	13833.7
