# Supplementary material for: Plant secondary metabolite-dependent plant-soil feedbacks can improve crop yield in the field
Source: eLife. 2023 Aug 1;12:e84988. doi: 10.7554/eLife.84988 (PMC10393292; doi:10.7554/eLife.84988)
Supplement: Figure 3—source data 1. [file elife-84988-fig3-data1.xlsx]

## Sheet: Figure_3
sample_nr	plot_id	sample_id	wheat_var	conditioning	pos_y	emergence	chlorophyll	height_mean	dry_weight
Exp_9_01	plot_01	bx01_a	fiorina	bx1	4.5	240	43	93.12	642.96
Exp_9_02	plot_01	bx01_b	fiorina	bx1	4.5	266.667	39.8	91.18	526.08
Exp_9_03	plot_02	WT01_a	fiorina	WT	13.5	304	43	95.4	523.2
Exp_9_04	plot_02	WT01_b	fiorina	WT	13.5	277.333	40.7	93.89	778.72
Exp_9_05	plot_03	bx02_a	fiorina	bx1	22.5	208	40.3	92.65	553.36
Exp_9_06	plot_03	bx02_b	fiorina	bx1	22.5	266.667	38.2	92.61	710
Exp_9_07	plot_04	WT02_a	fiorina	WT	31.5	256	40.5	98.04	789.04
Exp_9_08	plot_04	WT02_b	fiorina	WT	31.5	288	40.6	98.29	940.88
Exp_9_09	plot_05	bx03_a	fiorina	bx1	40.5	218.667	41.1	95.73	528.08
Exp_9_10	plot_05	bx03_b	fiorina	bx1	40.5	208	38.2	95.27	828.96
Exp_9_11	plot_06	WT03_a	fiorina	WT	49.5	186.667	40	99.32	727.2
Exp_9_12	plot_06	WT03_b	fiorina	WT	49.5	272	38.6	97.73	727.44
Exp_9_13	plot_07	bx04_a	fiorina	bx1	58.5	234.667	40.5	94.3	672.48
Exp_9_14	plot_07	bx04_b	fiorina	bx1	58.5	266.667	37.3	92.98	635.6
Exp_9_15	plot_08	WT04_a	fiorina	WT	67.5	224	40.1	97.29	666.08
Exp_9_16	plot_08	WT04_b	fiorina	WT	67.5	352	40.4	94.33	728.24
Exp_9_17	plot_09	bx05_a	fiorina	bx1	76.5	197.333	43.6	94.07	721.68
Exp_9_18	plot_09	bx05_b	fiorina	bx1	76.5	293.333	40.7	93.2	511.2
Exp_9_19	plot_10	WT05_a	fiorina	WT	85.5	245.333	43.4	94.93	489.28
Exp_9_20	plot_10	WT05_b	fiorina	WT	85.5	298.667	38.8	97.49	816
Exp_9_21	plot_11	bx06_a	claro	bx1	4.5	240	39.5	84.11	656.64
Exp_9_22	plot_11	bx06_b	claro	bx1	4.5	266.667	43.3	84.76	585.92
Exp_9_23	plot_12	WT06_a	claro	WT	13.5	298.667	44.7	89.74	746.96
Exp_9_24	plot_12	WT06_b	claro	WT	13.5	245.333	47.6	90	778.16
Exp_9_25	plot_13	bx07_a	claro	bx1	22.5	234.667	37.3	86.36	678.08
Exp_9_26	plot_13	bx07_b	claro	bx1	22.5	261.333	44.8	87.74	598.64
Exp_9_27	plot_14	WT07_a	claro	WT	31.5	288	44.7	90.48	824.8
Exp_9_28	plot_14	WT07_b	claro	WT	31.5	314.667	45.8	90.99	832.56
Exp_9_29	plot_15	bx08_a	claro	bx1	40.5	314.667	44.6	88.25	749.44
Exp_9_30	plot_15	bx08_b	claro	bx1	40.5	298.667	44.6	86.95	827.36
Exp_9_31	plot_16	WT08_a	claro	WT	49.5	234.667	45.8	90.6	782
Exp_9_32	plot_16	WT08_b	claro	WT	49.5	298.667	42.4	89.29	679.84
Exp_9_33	plot_17	bx09_a	claro	bx1	58.5	250.667	43.6	86.84	604.4
Exp_9_34	plot_17	bx09_b	claro	bx1	58.5	288	41.8	86.01	789.92
Exp_9_35	plot_18	WT09_a	claro	WT	67.5	266.667	44	87.16	695.28
Exp_9_36	plot_18	WT09_b	claro	WT	67.5	394.667	43.2	86.83	755.12
Exp_9_37	plot_19	bx10_a	claro	bx1	76.5	245.333	43.2	84.18	526.48
Exp_9_38	plot_19	bx10_b	claro	bx1	76.5	341.333	45	84.22	624.64
Exp_9_39	plot_20	WT10_a	claro	WT	85.5	293.333	43.8	87.1	755.36
Exp_9_40	plot_20	WT10_b	claro	WT	85.5	293.333	46.8	88.86	845.92
Exp_9_41	plot_21	bx11_a	fiorina	bx1	4.5	218.667	43.7	91.91	685.76
Exp_9_42	plot_21	bx11_b	fiorina	bx1	4.5	261.333	44.9	91.15	568.56
Exp_9_43	plot_22	WT11_a	fiorina	WT	13.5	304	44.9	96.87	827.52
Exp_9_44	plot_22	WT11_b	fiorina	WT	13.5	288	44.9	95.15	721.52
Exp_9_45	plot_23	bx12_a	fiorina	bx1	22.5	192	41.4	94.3	631.6
Exp_9_46	plot_23	bx12_b	fiorina	bx1	22.5	272	40.2	93.67	706
Exp_9_47	plot_24	WT12_a	fiorina	WT	31.5	261.333	38.7	98.06	748.16
Exp_9_48	plot_24	WT12_b	fiorina	WT	31.5	245.333	39.4	97.48	857.12
Exp_9_49	plot_25	bx13_a	fiorina	bx1	40.5	288	38.8	95.09	601.2
Exp_9_50	plot_25	bx13_b	fiorina	bx1	40.5	234.667	39.4	95.62	694.56
Exp_9_51	plot_26	WT13_a	fiorina	WT	49.5	288	42.3	98.53	644.56
Exp_9_52	plot_26	WT13_b	fiorina	WT	49.5	256	40	97.53	737.92
Exp_9_53	plot_27	bx14_a	fiorina	bx1	58.5	282.667	39	93.67	634.32
Exp_9_54	plot_27	bx14_b	fiorina	bx1	58.5	192	38	94.78	761.68
Exp_9_55	plot_28	WT14_a	fiorina	WT	67.5	250.667	40	97.68	695.44
Exp_9_56	plot_28	WT14_b	fiorina	WT	67.5	250.667	39.5	97.83	794.56
Exp_9_57	plot_29	bx15_a	fiorina	bx1	76.5	245.333	38.6	94.65	625.84
Exp_9_58	plot_29	bx15_b	fiorina	bx1	76.5	240	39.7	93.93	589.52
Exp_9_59	plot_30	WT15_a	fiorina	WT	85.5	256	41.4	96.48	711.04
Exp_9_60	plot_30	WT15_b	fiorina	WT	85.5	309.333	40.2	100.77	885.44
Exp_9_61	plot_31	bx16_a	claro	bx1	4.5	272	44.9	87.57	632.24
Exp_9_62	plot_31	bx16_b	claro	bx1	4.5	282.667	48.2	83.63	667.92
Exp_9_63	plot_32	WT16_a	claro	WT	13.5	213.333	48.1	90.09	728.08
Exp_9_64	plot_32	WT16_b	claro	WT	13.5	213.333	44.1	88.72	612.16
Exp_9_65	plot_33	bx17_a	claro	bx1	22.5	186.667	41.9	87.05	568.88
Exp_9_66	plot_33	bx17_b	claro	bx1	22.5	245.333	43.7	87.13	639.04
Exp_9_67	plot_34	WT17_a	claro	WT	31.5	277.333	41.6	87.4	831.2
Exp_9_68	plot_34	WT17_b	claro	WT	31.5	309.333	44.2	88.35	586.8
Exp_9_69	plot_35	bx18_a	claro	bx1	40.5	346.667	43	87.09	626.72
Exp_9_70	plot_35	bx18_b	claro	bx1	40.5	245.333	42.6	86.72	645.92
Exp_9_71	plot_36	WT18_a	claro	WT	49.5	298.667	42.3	89.84	878.4
Exp_9_72	plot_36	WT18_b	claro	WT	49.5	229.333	43.6	89.91	655.44
Exp_9_73	plot_37	bx19_a	claro	bx1	58.5	288	41	85.98	690.64
Exp_9_74	plot_37	bx19_b	claro	bx1	58.5	266.667	38.2	84.76	867.6
Exp_9_75	plot_38	WT19_a	claro	WT	67.5	266.667	43	91.54	788.16
Exp_9_76	plot_38	WT19_b	claro	WT	67.5	250.667	43.9	89.52	622.72
Exp_9_77	plot_39	bx20_a	claro	bx1	76.5	288	42.5	87.79	801.2
Exp_9_78	plot_39	bx20_b	claro	bx1	76.5	213.333	44.8	87.33	816
Exp_9_79	plot_40	WT20_a	claro	WT	85.5	282.667	45.6	90.12	747.52
Exp_9_80	plot_40	WT20_b	claro	WT	85.5	261.333	44.9	90.09	1012.72
Exp_9_81	plot_41	bx21_a	sailor	bx1	4.5	261.333	34.9	86.04	605.52
Exp_9_82	plot_41	bx21_b	sailor	bx1	4.5	202.667	36.3	85.15	771.12
Exp_9_83	plot_42	WT21_a	sailor	WT	13.5	256	39	88.04	873.12
Exp_9_84	plot_42	WT21_b	sailor	WT	13.5	245.333	38.4	89.89	765.92
Exp_9_85	plot_43	bx22_a	sailor	bx1	22.5	224	42.4	88.86	856.24
Exp_9_86	plot_43	bx22_b	sailor	bx1	22.5	208	39.3	92.16	833.76
Exp_9_87	plot_44	WT22_a	sailor	WT	31.5	197.333	41.2	89.76	818.16
Exp_9_88	plot_44	WT22_b	sailor	WT	31.5	240	39	90.3	746.48
Exp_9_89	plot_45	bx23_a	sailor	bx1	40.5	213.333	37.3	79.59	829.2
Exp_9_90	plot_45	bx23_b	sailor	bx1	40.5	218.667	35.3	79.46	846
Exp_9_91	plot_46	WT23_a	sailor	WT	49.5	229.333	39.3	87.71	749.12
Exp_9_92	plot_46	WT23_b	sailor	WT	49.5	213.333	39.8	87.55	969.52
Exp_9_93	plot_47	bx24_a	sailor	bx1	58.5	240	38.3	83.48	705.92
Exp_9_94	plot_47	bx24_b	sailor	bx1	58.5	218.667	40.1	83.39	869.68
Exp_9_95	plot_48	WT24_a	sailor	WT	67.5	218.667	39.6	85.73	701.84
Exp_9_96	plot_48	WT24_b	sailor	WT	67.5	245.333	38	81.93	625.04
Exp_9_97	plot_49	bx25_a	sailor	bx1	76.5	218.667	38.6	81.49	486.72
Exp_9_98	plot_49	bx25_b	sailor	bx1	76.5	245.333	39.8	78.85	480.56
Exp_9_99	plot_50	WT25_a	sailor	WT	85.5	261.333	36.2	85.74	791.92
Exp_9_100	plot_50	WT25_b	sailor	WT	85.5	250.667	38.5	84.91	767.12
Exp_9_101	plot_51	bx26_a	sailor	bx1	4.5	240	35.7	87.27	793.52
Exp_9_102	plot_51	bx26_b	sailor	bx1	4.5	229.333	34.8	87.8	826.72
Exp_9_103	plot_52	WT26_a	sailor	WT	13.5	282.667	37.2	94.78	718.96
Exp_9_104	plot_52	WT26_b	sailor	WT	13.5	261.333	38.3	92.75	901.44
Exp_9_105	plot_53	bx27_a	sailor	bx1	22.5	240	38.9	93.46	913.44
Exp_9_106	plot_53	bx27_b	sailor	bx1	22.5	229.333	37.7	95.88	579.68
Exp_9_107	plot_54	WT27_a	sailor	WT	31.5	261.333	42.1	89.73	917.84
Exp_9_108	plot_54	WT27_b	sailor	WT	31.5	256	43	91.53	690.08
Exp_9_109	plot_55	bx28_a	sailor	bx1	40.5	240	39	80.23	577.6
Exp_9_110	plot_55	bx28_b	sailor	bx1	40.5	213.333	36.3	80.04	735.2
Exp_9_111	plot_56	WT28_a	sailor	WT	49.5	240	40.1	89	666.72
Exp_9_112	plot_56	WT28_b	sailor	WT	49.5	245.333	39.1	86.45	604.8
Exp_9_113	plot_57	bx29_a	sailor	bx1	58.5	240	39.4	84.72	436.88
Exp_9_114	plot_57	bx29_b	sailor	bx1	58.5	186.667	39.5	84.08	521.76
Exp_9_115	plot_58	WT29_a	sailor	WT	67.5	240	37.6	87.98	704.64
Exp_9_116	plot_58	WT29_b	sailor	WT	67.5	266.667	38.1	87.56	698.56
Exp_9_117	plot_59	bx30_a	sailor	bx1	76.5	213.333	40.6	78.86	588.24
Exp_9_118	plot_59	bx30_b	sailor	bx1	76.5	218.667	37	79.95	582.08
Exp_9_119	plot_60	WT30_a	sailor	WT	85.5	293.333	39.6	87.84	753.2
Exp_9_120	plot_60	WT30_b	sailor	WT	85.5	256	38.5	85.94	719.12

## Sheet: Figure_3 - fig. sup. 1
sample_nr	plot_id	sample_id	wheat_var	genotype	pos_y	fresh_weight	water_content
Exp_9_01	plot_01	bx01_a	fiorina	bx1	4.5	3316	80.6104
Exp_9_02	plot_01	bx01_b	fiorina	bx1	4.5	2648	80.1329
Exp_9_03	plot_02	WT01_a	fiorina	WT	13.5	2708	80.6795
Exp_9_04	plot_02	WT01_b	fiorina	WT	13.5	4152	81.2447
Exp_9_05	plot_03	bx02_a	fiorina	bx1	22.5	2784	80.1236
Exp_9_06	plot_03	bx02_b	fiorina	bx1	22.5	3852	81.568
Exp_9_07	plot_04	WT02_a	fiorina	WT	31.5	4112	80.8113
Exp_9_08	plot_04	WT02_b	fiorina	WT	31.5	5236	82.0306
Exp_9_09	plot_05	bx03_a	fiorina	bx1	40.5	2684	80.3249
Exp_9_10	plot_05	bx03_b	fiorina	bx1	40.5	4728	82.467
Exp_9_11	plot_06	WT03_a	fiorina	WT	49.5	3844	81.0822
Exp_9_12	plot_06	WT03_b	fiorina	WT	49.5	3920	81.4429
Exp_9_13	plot_07	bx04_a	fiorina	bx1	58.5	3592	81.2784
Exp_9_14	plot_07	bx04_b	fiorina	bx1	58.5	3440	81.5233
Exp_9_15	plot_08	WT04_a	fiorina	WT	67.5	3648	81.7412
Exp_9_16	plot_08	WT04_b	fiorina	WT	67.5	4028	81.9206
Exp_9_17	plot_09	bx05_a	fiorina	bx1	76.5	3824	81.1276
Exp_9_18	plot_09	bx05_b	fiorina	bx1	76.5	2620	80.4885
Exp_9_19	plot_10	WT05_a	fiorina	WT	85.5	2400	79.6133
Exp_9_20	plot_10	WT05_b	fiorina	WT	85.5	4536	82.0106
Exp_9_21	plot_11	bx06_a	claro	bx1	4.5	3448	80.9559
Exp_9_22	plot_11	bx06_b	claro	bx1	4.5	3140	81.3401
Exp_9_23	plot_12	WT06_a	claro	WT	13.5	4548	83.5761
Exp_9_24	plot_12	WT06_b	claro	WT	13.5	4804	83.8018
Exp_9_25	plot_13	bx07_a	claro	bx1	22.5	3740	81.8695
Exp_9_26	plot_13	bx07_b	claro	bx1	22.5	3504	82.9155
Exp_9_27	plot_14	WT07_a	claro	WT	31.5	4884	83.1122
Exp_9_28	plot_14	WT07_b	claro	WT	31.5	5088	83.6368
Exp_9_29	plot_15	bx08_a	claro	bx1	40.5	4380	82.8895
Exp_9_30	plot_15	bx08_b	claro	bx1	40.5	4944	83.2654
Exp_9_31	plot_16	WT08_a	claro	WT	49.5	4646.4	83.1698
Exp_9_32	plot_16	WT08_b	claro	WT	49.5	4092	83.3861
Exp_9_33	plot_17	bx09_a	claro	bx1	58.5	3456	82.5116
Exp_9_34	plot_17	bx09_b	claro	bx1	58.5	4376	81.9488
Exp_9_35	plot_18	WT09_a	claro	WT	67.5	4032	82.756
Exp_9_36	plot_18	WT09_b	claro	WT	67.5	4380	82.7598
Exp_9_37	plot_19	bx10_a	claro	bx1	76.5	2956	82.1894
Exp_9_38	plot_19	bx10_b	claro	bx1	76.5	3576	82.5324
Exp_9_39	plot_20	WT10_a	claro	WT	85.5	4428	82.9413
Exp_9_40	plot_20	WT10_b	claro	WT	85.5	5096	83.4003
Exp_9_41	plot_21	bx11_a	fiorina	bx1	4.5	3580	80.8447
Exp_9_42	plot_21	bx11_b	fiorina	bx1	4.5	2792	79.6361
Exp_9_43	plot_22	WT11_a	fiorina	WT	13.5	4804	82.7744
Exp_9_44	plot_22	WT11_b	fiorina	WT	13.5	3852	81.269
Exp_9_45	plot_23	bx12_a	fiorina	bx1	22.5	3264	80.6495
Exp_9_46	plot_23	bx12_b	fiorina	bx1	22.5	3584	80.3013
Exp_9_47	plot_24	WT12_a	fiorina	WT	31.5	4296	82.5847
Exp_9_48	plot_24	WT12_b	fiorina	WT	31.5	4648	81.5594
Exp_9_49	plot_25	bx13_a	fiorina	bx1	40.5	3108	80.6564
Exp_9_50	plot_25	bx13_b	fiorina	bx1	40.5	3524	80.2906
Exp_9_51	plot_26	WT13_a	fiorina	WT	49.5	3524	81.7094
Exp_9_52	plot_26	WT13_b	fiorina	WT	49.5	3868	80.9224
Exp_9_53	plot_27	bx14_a	fiorina	bx1	58.5	3212	80.2516
Exp_9_54	plot_27	bx14_b	fiorina	bx1	58.5	3976	80.8431
Exp_9_55	plot_28	WT14_a	fiorina	WT	67.5	3612	80.7464
Exp_9_56	plot_28	WT14_b	fiorina	WT	67.5	4240	81.2604
Exp_9_57	plot_29	bx15_a	fiorina	bx1	76.5	3108	79.8636
Exp_9_58	plot_29	bx15_b	fiorina	bx1	76.5	3080	80.8597
Exp_9_59	plot_30	WT15_a	fiorina	WT	85.5	3716	80.8654
Exp_9_60	plot_30	WT15_b	fiorina	WT	85.5	4928	82.0325
Exp_9_61	plot_31	bx16_a	claro	bx1	4.5	3544	82.1603
Exp_9_62	plot_31	bx16_b	claro	bx1	4.5	3720	82.0452
Exp_9_63	plot_32	WT16_a	claro	WT	13.5	4428	83.5574
Exp_9_64	plot_32	WT16_b	claro	WT	13.5	3296	81.4272
Exp_9_65	plot_33	bx17_a	claro	bx1	22.5	3032	81.2375
Exp_9_66	plot_33	bx17_b	claro	bx1	22.5	3612	82.3079
Exp_9_67	plot_34	WT17_a	claro	WT	31.5	4676	82.2241
Exp_9_68	plot_34	WT17_b	claro	WT	31.5	3160	81.4304
Exp_9_69	plot_35	bx18_a	claro	bx1	40.5	3364	81.3698
Exp_9_70	plot_35	bx18_b	claro	bx1	40.5	3480	81.4391
Exp_9_71	plot_36	WT18_a	claro	WT	49.5	4888	82.0295
Exp_9_72	plot_36	WT18_b	claro	WT	49.5	3800	82.7516
Exp_9_73	plot_37	bx19_a	claro	bx1	58.5	3756	81.6124
Exp_9_74	plot_37	bx19_b	claro	bx1	58.5	4704	81.5561
Exp_9_75	plot_38	WT19_a	claro	WT	67.5	4448	82.2806
Exp_9_76	plot_38	WT19_b	claro	WT	67.5	3280	81.0146
Exp_9_77	plot_39	bx20_a	claro	bx1	76.5	4704	82.9677
Exp_9_78	plot_39	bx20_b	claro	bx1	76.5	4688	82.5939
Exp_9_79	plot_40	WT20_a	claro	WT	85.5	4284	82.5509
Exp_9_80	plot_40	WT20_b	claro	WT	85.5	5856	82.7063
Exp_9_81	plot_41	bx21_a	sailor	bx1	4.5	2716	77.7054
Exp_9_82	plot_41	bx21_b	sailor	bx1	4.5	3716	79.2487
Exp_9_83	plot_42	WT21_a	sailor	WT	13.5	4016	78.259
Exp_9_84	plot_42	WT21_b	sailor	WT	13.5	3600	78.7244
Exp_9_85	plot_43	bx22_a	sailor	bx1	22.5	3792	77.4198
Exp_9_86	plot_43	bx22_b	sailor	bx1	22.5	3668	77.2694
Exp_9_87	plot_44	WT22_a	sailor	WT	31.5	3968	79.381
Exp_9_88	plot_44	WT22_b	sailor	WT	31.5	3552	78.9842
Exp_9_89	plot_45	bx23_a	sailor	bx1	40.5	3400	75.6118
Exp_9_90	plot_45	bx23_b	sailor	bx1	40.5	3640	76.7582
Exp_9_91	plot_46	WT23_a	sailor	WT	49.5	3380	77.8367
Exp_9_92	plot_46	WT23_b	sailor	WT	49.5	4068	76.1672
Exp_9_93	plot_47	bx24_a	sailor	bx1	58.5	3340	78.8647
Exp_9_94	plot_47	bx24_b	sailor	bx1	58.5	4036	78.4519
Exp_9_95	plot_48	WT24_a	sailor	WT	67.5	3180	77.9296
Exp_9_96	plot_48	WT24_b	sailor	WT	67.5	2792	77.6132
Exp_9_97	plot_49	bx25_a	sailor	bx1	76.5	1960	75.1673
Exp_9_98	plot_49	bx25_b	sailor	bx1	76.5	2000	75.972
Exp_9_99	plot_50	WT25_a	sailor	WT	85.5	3104	74.4871
Exp_9_100	plot_50	WT25_b	sailor	WT	85.5	3264	76.4975
Exp_9_101	plot_51	bx26_a	sailor	bx1	4.5	3928	79.7984
Exp_9_102	plot_51	bx26_b	sailor	bx1	4.5	4196	80.2974
Exp_9_103	plot_52	WT26_a	sailor	WT	13.5	3544	79.7133
Exp_9_104	plot_52	WT26_b	sailor	WT	13.5	4360	79.3248
Exp_9_105	plot_53	bx27_a	sailor	bx1	22.5	4288	78.6978
Exp_9_106	plot_53	bx27_b	sailor	bx1	22.5	2488	76.701
Exp_9_107	plot_54	WT27_a	sailor	WT	31.5	4336	78.8321
Exp_9_108	plot_54	WT27_b	sailor	WT	31.5	3220	78.5689
Exp_9_109	plot_55	bx28_a	sailor	bx1	40.5	2532	77.188
Exp_9_110	plot_55	bx28_b	sailor	bx1	40.5	3072	76.0677
Exp_9_111	plot_56	WT28_a	sailor	WT	49.5	2832	76.4576
Exp_9_112	plot_56	WT28_b	sailor	WT	49.5	2620	76.916
Exp_9_113	plot_57	bx29_a	sailor	bx1	58.5	2020	78.3723
Exp_9_114	plot_57	bx29_b	sailor	bx1	58.5	2344	77.7406
Exp_9_115	plot_58	WT29_a	sailor	WT	67.5	3156	77.673
Exp_9_116	plot_58	WT29_b	sailor	WT	67.5	3428	79.6219
Exp_9_117	plot_59	bx30_a	sailor	bx1	76.5	2632	77.6505
Exp_9_118	plot_59	bx30_b	sailor	bx1	76.5	2520	76.9016
Exp_9_119	plot_60	WT30_a	sailor	WT	85.5	3324	77.3406
Exp_9_120	plot_60	WT30_b	sailor	WT	85.5	3088	76.7124
