# Supplementary material for: Plant secondary metabolite-dependent plant-soil feedbacks can improve crop yield in the field
Source: eLife. 2023 Aug 1;12:e84988. doi: 10.7554/eLife.84988 (PMC10393292; doi:10.7554/eLife.84988)
Supplement: Figure 4—source data 1. [file elife-84988-fig4-data1.xlsx]

## Sheet: Figure_4A
sample_nr	plot_id	sample_id	wheat_var	conditioning	pos_y	weed_cover
Exp_9_02	plot_01	bx01	fiorina	bx1	4.5	40
Exp_9_04	plot_02	WT01	fiorina	WT	13.5	50
Exp_9_06	plot_03	bx02	fiorina	bx1	22.5	75
Exp_9_08	plot_04	WT02	fiorina	WT	31.5	70
Exp_9_10	plot_05	bx03	fiorina	bx1	40.5	40
Exp_9_12	plot_06	WT03	fiorina	WT	49.5	30
Exp_9_14	plot_07	bx04	fiorina	bx1	58.5	30
Exp_9_16	plot_08	WT04	fiorina	WT	67.5	10
Exp_9_18	plot_09	bx05	fiorina	bx1	76.5	15
Exp_9_20	plot_10	WT05	fiorina	WT	85.5	10
Exp_9_22	plot_11	bx06	claro	bx1	4.5	50
Exp_9_24	plot_12	WT06	claro	WT	13.5	55
Exp_9_26	plot_13	bx07	claro	bx1	22.5	80
Exp_9_28	plot_14	WT07	claro	WT	31.5	80
Exp_9_30	plot_15	bx08	claro	bx1	40.5	60
Exp_9_32	plot_16	WT08	claro	WT	49.5	65
Exp_9_34	plot_17	bx09	claro	bx1	58.5	65
Exp_9_36	plot_18	WT09	claro	WT	67.5	55
Exp_9_38	plot_19	bx10	claro	bx1	76.5	50
Exp_9_40	plot_20	WT10	claro	WT	85.5	20
Exp_9_42	plot_21	bx11	fiorina	bx1	4.5	65
Exp_9_44	plot_22	WT11	fiorina	WT	13.5	60
Exp_9_46	plot_23	bx12	fiorina	bx1	22.5	75
Exp_9_48	plot_24	WT12	fiorina	WT	31.5	65
Exp_9_50	plot_25	bx13	fiorina	bx1	40.5	50
Exp_9_52	plot_26	WT13	fiorina	WT	49.5	55
Exp_9_54	plot_27	bx14	fiorina	bx1	58.5	65
Exp_9_56	plot_28	WT14	fiorina	WT	67.5	60
Exp_9_58	plot_29	bx15	fiorina	bx1	76.5	40
Exp_9_60	plot_30	WT15	fiorina	WT	85.5	25
Exp_9_62	plot_31	bx16	claro	bx1	4.5	65
Exp_9_64	plot_32	WT16	claro	WT	13.5	75
Exp_9_66	plot_33	bx17	claro	bx1	22.5	75
Exp_9_68	plot_34	WT17	claro	WT	31.5	80
Exp_9_70	plot_35	bx18	claro	bx1	40.5	75
Exp_9_72	plot_36	WT18	claro	WT	49.5	75
Exp_9_74	plot_37	bx19	claro	bx1	58.5	75
Exp_9_76	plot_38	WT19	claro	WT	67.5	80
Exp_9_78	plot_39	bx20	claro	bx1	76.5	75
Exp_9_80	plot_40	WT20	claro	WT	85.5	60

## Sheet: Figure_4B
sample_nr	plot_id	sample_id	wheat_var	conditioning	pos_y	nr_larvae_per_tiller
Exp_9_01	plot_01	bx01_a	fiorina	bx1	4.5	0.0952381
Exp_9_02	plot_01	bx01_b	fiorina	bx1	4.5	0.0491803
Exp_9_03	plot_02	WT01_a	fiorina	WT	13.5	0.0576923
Exp_9_04	plot_02	WT01_b	fiorina	WT	13.5	0.0512821
Exp_9_05	plot_03	bx02_a	fiorina	bx1	22.5	0.0344828
Exp_9_06	plot_03	bx02_b	fiorina	bx1	22.5	0.0606061
Exp_9_07	plot_04	WT02_a	fiorina	WT	31.5	0.0263158
Exp_9_08	plot_04	WT02_b	fiorina	WT	31.5	0.0128205
Exp_9_09	plot_05	bx03_a	fiorina	bx1	40.5	0.136364
Exp_9_10	plot_05	bx03_b	fiorina	bx1	40.5	0.0641026
Exp_9_11	plot_06	WT03_a	fiorina	WT	49.5	0.03125
Exp_9_12	plot_06	WT03_b	fiorina	WT	49.5	0.0675676
Exp_9_13	plot_07	bx04_a	fiorina	bx1	58.5	0.0769231
Exp_9_14	plot_07	bx04_b	fiorina	bx1	58.5	0.0625
Exp_9_15	plot_08	WT04_a	fiorina	WT	67.5	0.030303
Exp_9_16	plot_08	WT04_b	fiorina	WT	67.5	0.0547945
Exp_9_17	plot_09	bx05_a	fiorina	bx1	76.5	0.101449
Exp_9_18	plot_09	bx05_b	fiorina	bx1	76.5	0.103448
Exp_9_19	plot_10	WT05_a	fiorina	WT	85.5	0.0833333
Exp_9_20	plot_10	WT05_b	fiorina	WT	85.5	0.111111
Exp_9_21	plot_11	bx06_a	claro	bx1	4.5	0.0869565
Exp_9_22	plot_11	bx06_b	claro	bx1	4.5	0.0208333
Exp_9_23	plot_12	WT06_a	claro	WT	13.5	0.0169492
Exp_9_24	plot_12	WT06_b	claro	WT	13.5	0
Exp_9_25	plot_13	bx07_a	claro	bx1	22.5	0.0545455
Exp_9_26	plot_13	bx07_b	claro	bx1	22.5	0.04
Exp_9_27	plot_14	WT07_a	claro	WT	31.5	0.030303
Exp_9_28	plot_14	WT07_b	claro	WT	31.5	0.03125
Exp_9_29	plot_15	bx08_a	claro	bx1	40.5	0.0566038
Exp_9_30	plot_15	bx08_b	claro	bx1	40.5	0.0454545
Exp_9_31	plot_16	WT08_a	claro	WT	49.5	0.0526316
Exp_9_32	plot_16	WT08_b	claro	WT	49.5	0.0163934
Exp_9_33	plot_17	bx09_a	claro	bx1	58.5	0.106383
Exp_9_34	plot_17	bx09_b	claro	bx1	58.5	0.0526316
Exp_9_35	plot_18	WT09_a	claro	WT	67.5	0.0377358
Exp_9_36	plot_18	WT09_b	claro	WT	67.5	0.0178571
Exp_9_37	plot_19	bx10_a	claro	bx1	76.5	0.113636
Exp_9_38	plot_19	bx10_b	claro	bx1	76.5	0.0576923
Exp_9_39	plot_20	WT10_a	claro	WT	85.5	0.0847458
Exp_9_40	plot_20	WT10_b	claro	WT	85.5	0.0298507
Exp_9_41	plot_21	bx11_a	fiorina	bx1	4.5	0.0757576
Exp_9_42	plot_21	bx11_b	fiorina	bx1	4.5	0.0727273
Exp_9_43	plot_22	WT11_a	fiorina	WT	13.5	0.0361446
Exp_9_44	plot_22	WT11_b	fiorina	WT	13.5	0.0294118
Exp_9_45	plot_23	bx12_a	fiorina	bx1	22.5	0.122807
Exp_9_46	plot_23	bx12_b	fiorina	bx1	22.5	0.109375
Exp_9_47	plot_24	WT12_a	fiorina	WT	31.5	0.0416667
Exp_9_48	plot_24	WT12_b	fiorina	WT	31.5	0.0243902
Exp_9_49	plot_25	bx13_a	fiorina	bx1	40.5	0.0338983
Exp_9_50	plot_25	bx13_b	fiorina	bx1	40.5	0.030303
Exp_9_51	plot_26	WT13_a	fiorina	WT	49.5	0.0882353
Exp_9_52	plot_26	WT13_b	fiorina	WT	49.5	0.0588235
Exp_9_53	plot_27	bx14_a	fiorina	bx1	58.5	0.106061
Exp_9_54	plot_27	bx14_b	fiorina	bx1	58.5	0.102941
Exp_9_55	plot_28	WT14_a	fiorina	WT	67.5	0.0508475
Exp_9_56	plot_28	WT14_b	fiorina	WT	67.5	0.0131579
Exp_9_57	plot_29	bx15_a	fiorina	bx1	76.5	0.129032
Exp_9_58	plot_29	bx15_b	fiorina	bx1	76.5	0.0526316
Exp_9_59	plot_30	WT15_a	fiorina	WT	85.5	0.046875
Exp_9_60	plot_30	WT15_b	fiorina	WT	85.5	0.0238095
Exp_9_61	plot_31	bx16_a	claro	bx1	4.5	0.0425532
Exp_9_62	plot_31	bx16_b	claro	bx1	4.5	0.0535714
Exp_9_63	plot_32	WT16_a	claro	WT	13.5	0
Exp_9_64	plot_32	WT16_b	claro	WT	13.5	0.0227273
Exp_9_65	plot_33	bx17_a	claro	bx1	22.5	0.0454545
Exp_9_66	plot_33	bx17_b	claro	bx1	22.5	0.0961538
Exp_9_67	plot_34	WT17_a	claro	WT	31.5	0.056338
Exp_9_68	plot_34	WT17_b	claro	WT	31.5	0
Exp_9_69	plot_35	bx18_a	claro	bx1	40.5	0.0714286
Exp_9_70	plot_35	bx18_b	claro	bx1	40.5	0.0952381
Exp_9_71	plot_36	WT18_a	claro	WT	49.5	0.0447761
Exp_9_72	plot_36	WT18_b	claro	WT	49.5	0.0816327
Exp_9_73	plot_37	bx19_a	claro	bx1	58.5	0.0196078
Exp_9_74	plot_37	bx19_b	claro	bx1	58.5	0.0645161
Exp_9_75	plot_38	WT19_a	claro	WT	67.5	0.0338983
Exp_9_76	plot_38	WT19_b	claro	WT	67.5	0.0652174
Exp_9_77	plot_39	bx20_a	claro	bx1	76.5	0.0338983
Exp_9_78	plot_39	bx20_b	claro	bx1	76.5	0.0147059
Exp_9_79	plot_40	WT20_a	claro	WT	85.5	0.0178571
Exp_9_80	plot_40	WT20_b	claro	WT	85.5	0.0384615
Exp_9_81	plot_41	bx21_a	sailor	bx1	4.5	0.793103
Exp_9_82	plot_41	bx21_b	sailor	bx1	4.5	0.508475
Exp_9_83	plot_42	WT21_a	sailor	WT	13.5	0.235294
Exp_9_84	plot_42	WT21_b	sailor	WT	13.5	0.205882
Exp_9_85	plot_43	bx22_a	sailor	bx1	22.5	0.205882
Exp_9_86	plot_43	bx22_b	sailor	bx1	22.5	0.295082
Exp_9_87	plot_44	WT22_a	sailor	WT	31.5	0.0972222
Exp_9_88	plot_44	WT22_b	sailor	WT	31.5	0.0869565
Exp_9_89	plot_45	bx23_a	sailor	bx1	40.5	0.211268
Exp_9_90	plot_45	bx23_b	sailor	bx1	40.5	0.277108
Exp_9_91	plot_46	WT23_a	sailor	WT	49.5	0.138889
Exp_9_92	plot_46	WT23_b	sailor	WT	49.5	0.230769
Exp_9_93	plot_47	bx24_a	sailor	bx1	58.5	0.306667
Exp_9_94	plot_47	bx24_b	sailor	bx1	58.5	0.270833
Exp_9_95	plot_48	WT24_a	sailor	WT	67.5	0.325
Exp_9_96	plot_48	WT24_b	sailor	WT	67.5	0.266667
Exp_9_97	plot_49	bx25_a	sailor	bx1	76.5	0.551724
Exp_9_98	plot_49	bx25_b	sailor	bx1	76.5	0.807018
Exp_9_99	plot_50	WT25_a	sailor	WT	85.5	0.28169
Exp_9_100	plot_50	WT25_b	sailor	WT	85.5	0.246753
Exp_9_101	plot_51	bx26_a	sailor	bx1	4.5	0.444444
Exp_9_102	plot_51	bx26_b	sailor	bx1	4.5	0.4
Exp_9_103	plot_52	WT26_a	sailor	WT	13.5	0.243243
Exp_9_104	plot_52	WT26_b	sailor	WT	13.5	0.214286
Exp_9_105	plot_53	bx27_a	sailor	bx1	22.5	0.392405
Exp_9_106	plot_53	bx27_b	sailor	bx1	22.5	0.945946
Exp_9_107	plot_54	WT27_a	sailor	WT	31.5	0.202247
Exp_9_108	plot_54	WT27_b	sailor	WT	31.5	0.146667
Exp_9_109	plot_55	bx28_a	sailor	bx1	40.5	0.278689
Exp_9_110	plot_55	bx28_b	sailor	bx1	40.5	0.409836
Exp_9_111	plot_56	WT28_a	sailor	WT	49.5	0.233766
Exp_9_112	plot_56	WT28_b	sailor	WT	49.5	0.214286
Exp_9_113	plot_57	bx29_a	sailor	bx1	58.5	0.583333
Exp_9_114	plot_57	bx29_b	sailor	bx1	58.5	1.02083
Exp_9_115	plot_58	WT29_a	sailor	WT	67.5	0.242857
Exp_9_116	plot_58	WT29_b	sailor	WT	67.5	0.192771
Exp_9_117	plot_59	bx30_a	sailor	bx1	76.5	0.80303
Exp_9_118	plot_59	bx30_b	sailor	bx1	76.5	0.985075
Exp_9_119	plot_60	WT30_a	sailor	WT	85.5	0.263158
Exp_9_120	plot_60	WT30_b	sailor	WT	85.5	0.276316

## Sheet: Figure_4C
plot_id	sample_id	wheat_var	conditioning	pos_y	consumed_cm2
plot_01	bx01	fiorina	bx1	4.5	0.723247
plot_02	WT01	fiorina	WT	13.5	1.08501
plot_03	bx02	fiorina	bx1	22.5	0.803016
plot_04	WT02	fiorina	WT	31.5	0.863718
plot_05	bx03	fiorina	bx1	40.5	1.59717
plot_06	WT03	fiorina	WT	49.5	1.25252
plot_07	bx04	fiorina	bx1	58.5	1.29749
plot_08	WT04	fiorina	WT	67.5	1.21069
plot_09	bx05	fiorina	bx1	76.5	0.872273
plot_10	WT05	fiorina	WT	85.5	1.26682
plot_11	bx06	claro	bx1	4.5	0.733506
plot_12	WT06	claro	WT	13.5	0.495356
plot_13	bx07	claro	bx1	22.5	0.546346
plot_14	WT07	claro	WT	31.5	0.829468
plot_15	bx08	claro	bx1	40.5	0.855421
plot_16	WT08	claro	WT	49.5	1.14464
plot_17	bx09	claro	bx1	58.5	0.784053
plot_18	WT09	claro	WT	67.5	0.625216
plot_19	bx10	claro	bx1	76.5	0.644968
plot_20	WT10	claro	WT	85.5	0.989431
plot_21	bx11	fiorina	bx1	4.5	0.593682
plot_22	WT11	fiorina	WT	13.5	0.85929
plot_23	bx12	fiorina	bx1	22.5	1.03184
plot_24	WT12	fiorina	WT	31.5	0.935964
plot_25	bx13	fiorina	bx1	40.5	1.18198
plot_26	WT13	fiorina	WT	49.5	1.28085
plot_27	bx14	fiorina	bx1	58.5	1.44706
plot_28	WT14	fiorina	WT	67.5	1.18971
plot_29	bx15	fiorina	bx1	76.5	1.85521
plot_30	WT15	fiorina	WT	85.5	1.88819
plot_31	bx16	claro	bx1	4.5	0.864574
plot_32	WT16	claro	WT	13.5	0.312493
plot_33	bx17	claro	bx1	22.5	0.66251
plot_34	WT17	claro	WT	31.5	0.696447
plot_35	bx18	claro	bx1	40.5	0.66688
plot_36	WT18	claro	WT	49.5	1.14566
plot_37	bx19	claro	bx1	58.5	0.79336
plot_38	WT19	claro	WT	67.5	0.945847
plot_39	bx20	claro	bx1	76.5	0.579021
plot_40	WT20	claro	WT	85.5	1.50028
plot_41	bx21	sailor	bx1	4.5	3.40876
plot_42	WT21	sailor	WT	13.5	0.701918
plot_43	bx22	sailor	bx1	22.5	1.00242
plot_44	WT22	sailor	WT	31.5	1.01949
plot_45	bx23	sailor	bx1	40.5	3.49619
plot_47	bx24	sailor	bx1	58.5	2.02357
plot_48	WT24	sailor	WT	67.5	1.6064
plot_50	WT25	sailor	WT	85.5	2.95772
plot_51	bx26	sailor	bx1	4.5	1.77894
plot_52	WT26	sailor	WT	13.5	1.57568
plot_53	bx27	sailor	bx1	22.5	1.39905
plot_54	WT27	sailor	WT	31.5	0.865005
plot_55	bx28	sailor	bx1	40.5	2.50259
plot_56	WT28	sailor	WT	49.5	1.61777
plot_57	bx29	sailor	bx1	58.5	2.96561
plot_58	WT29	sailor	WT	67.5	1.52154
plot_59	bx30	sailor	bx1	76.5	3.89718
plot_60	WT30	sailor	WT	85.5	1.84503

## Sheet: Figure_4 - fig. sup. 1
plot_id	sample_id	wheat_var	conditioning	pos_y	hormone	concentration
plot_01	bx01	fiorina	bx1	4.5	SA	52.2917
plot_01	bx01	fiorina	bx1	4.5	ABA	31.4583
plot_01	bx01	fiorina	bx1	4.5	JA	0.539583
plot_01	bx01	fiorina	bx1	4.5	JA_Ile	0.304167
plot_01	bx01	fiorina	bx1	4.5	OPDA	1.74375
plot_02	WT01	fiorina	WT	13.5	SA	69.4231
plot_02	WT01	fiorina	WT	13.5	ABA	33.2692
plot_02	WT01	fiorina	WT	13.5	JA	2.71154
plot_02	WT01	fiorina	WT	13.5	JA_Ile	1.39615
plot_02	WT01	fiorina	WT	13.5	OPDA	3.59615
plot_03	bx02	fiorina	bx1	22.5	SA	56.6102
plot_03	bx02	fiorina	bx1	22.5	ABA	32.0339
plot_03	bx02	fiorina	bx1	22.5	JA	0.233898
plot_03	bx02	fiorina	bx1	22.5	JA_Ile	0.136102
plot_03	bx02	fiorina	bx1	22.5	OPDA	0.649153
plot_04	WT02	fiorina	WT	31.5	SA	45.4545
plot_04	WT02	fiorina	WT	31.5	ABA	31.1364
plot_04	WT02	fiorina	WT	31.5	JA	0.240909
plot_04	WT02	fiorina	WT	31.5	JA_Ile	0.142045
plot_04	WT02	fiorina	WT	31.5	OPDA	1.07045
plot_05	bx03	fiorina	bx1	40.5	SA	67.1111
plot_05	bx03	fiorina	bx1	40.5	ABA	37.7778
plot_05	bx03	fiorina	bx1	40.5	JA	2.26667
plot_05	bx03	fiorina	bx1	40.5	JA_Ile	0.964444
plot_05	bx03	fiorina	bx1	40.5	OPDA	4.51111
plot_06	WT03	fiorina	WT	49.5	SA	55
plot_06	WT03	fiorina	WT	49.5	ABA	33.1818
plot_06	WT03	fiorina	WT	49.5	JA	0.818182
plot_06	WT03	fiorina	WT	49.5	JA_Ile	0.224318
plot_06	WT03	fiorina	WT	49.5	OPDA	4.20455
plot_07	bx04	fiorina	bx1	58.5	SA	NA
plot_07	bx04	fiorina	bx1	58.5	ABA	35.814
plot_07	bx04	fiorina	bx1	58.5	JA	1.30465
plot_07	bx04	fiorina	bx1	58.5	JA_Ile	0.655814
plot_07	bx04	fiorina	bx1	58.5	OPDA	3.25581
plot_08	WT04	fiorina	WT	67.5	SA	75.2688
plot_08	WT04	fiorina	WT	67.5	ABA	34.8387
plot_08	WT04	fiorina	WT	67.5	JA	0.556989
plot_08	WT04	fiorina	WT	67.5	JA_Ile	0.298925
plot_08	WT04	fiorina	WT	67.5	OPDA	1.4129
plot_09	bx05	fiorina	bx1	76.5	SA	72.5714
plot_09	bx05	fiorina	bx1	76.5	ABA	39.4286
plot_09	bx05	fiorina	bx1	76.5	JA	3.27619
plot_09	bx05	fiorina	bx1	76.5	JA_Ile	2.17143
plot_09	bx05	fiorina	bx1	76.5	OPDA	NA
plot_10	WT05	fiorina	WT	85.5	SA	48.3673
plot_10	WT05	fiorina	WT	85.5	ABA	31.2245
plot_10	WT05	fiorina	WT	85.5	JA	2.34694
plot_10	WT05	fiorina	WT	85.5	JA_Ile	NA
plot_10	WT05	fiorina	WT	85.5	OPDA	2.55102
plot_11	bx06	claro	bx1	4.5	SA	198.776
plot_11	bx06	claro	bx1	4.5	ABA	22.2449
plot_11	bx06	claro	bx1	4.5	JA	0.985714
plot_11	bx06	claro	bx1	4.5	JA_Ile	0.236735
plot_11	bx06	claro	bx1	4.5	OPDA	5.04082
plot_12	WT06	claro	WT	13.5	SA	125.895
plot_12	WT06	claro	WT	13.5	ABA	27.1579
plot_12	WT06	claro	WT	13.5	JA	NA
plot_12	WT06	claro	WT	13.5	JA_Ile	0.528421
plot_12	WT06	claro	WT	13.5	OPDA	2.25263
plot_13	bx07	claro	bx1	22.5	SA	300
plot_13	bx07	claro	bx1	22.5	ABA	23.1915
plot_13	bx07	claro	bx1	22.5	JA	0.629787
plot_13	bx07	claro	bx1	22.5	JA_Ile	0.274468
plot_13	bx07	claro	bx1	22.5	OPDA	1.07872
plot_14	WT07	claro	WT	31.5	SA	184.301
plot_14	WT07	claro	WT	31.5	ABA	24.086
plot_14	WT07	claro	WT	31.5	JA	0.335484
plot_14	WT07	claro	WT	31.5	JA_Ile	0.0793548
plot_14	WT07	claro	WT	31.5	OPDA	2.47312
plot_15	bx08	claro	bx1	40.5	SA	165.524
plot_15	bx08	claro	bx1	40.5	ABA	22.2857
plot_15	bx08	claro	bx1	40.5	JA	0.4
plot_15	bx08	claro	bx1	40.5	JA_Ile	0.28381
plot_15	bx08	claro	bx1	40.5	OPDA	1.73143
plot_16	WT08	claro	WT	49.5	SA	225.21
plot_16	WT08	claro	WT	49.5	ABA	21.6807
plot_16	WT08	claro	WT	49.5	JA	0.255462
plot_16	WT08	claro	WT	49.5	JA_Ile	0.127059
plot_16	WT08	claro	WT	49.5	OPDA	2.01681
plot_17	bx09	claro	bx1	58.5	SA	203.81
plot_17	bx09	claro	bx1	58.5	ABA	22.0952
plot_17	bx09	claro	bx1	58.5	JA	0.474286
plot_17	bx09	claro	bx1	58.5	JA_Ile	0.270476
plot_17	bx09	claro	bx1	58.5	OPDA	1.82857
plot_18	WT09	claro	WT	67.5	SA	254.545
plot_18	WT09	claro	WT	67.5	ABA	24.2424
plot_18	WT09	claro	WT	67.5	JA	0.238384
plot_18	WT09	claro	WT	67.5	JA_Ile	0.0977778
plot_18	WT09	claro	WT	67.5	OPDA	1.30909
plot_19	bx10	claro	bx1	76.5	SA	229.358
plot_19	bx10	claro	bx1	76.5	ABA	19.0826
plot_19	bx10	claro	bx1	76.5	JA	0.805505
plot_19	bx10	claro	bx1	76.5	JA_Ile	0.26789
plot_19	bx10	claro	bx1	76.5	OPDA	5.44954
plot_20	WT10	claro	WT	85.5	SA	189.412
plot_20	WT10	claro	WT	85.5	ABA	22.1569
plot_20	WT10	claro	WT	85.5	JA	0.709804
plot_20	WT10	claro	WT	85.5	JA_Ile	0.268627
plot_20	WT10	claro	WT	85.5	OPDA	1.70392
plot_21	bx11	fiorina	bx1	4.5	SA	45.25
plot_21	bx11	fiorina	bx1	4.5	ABA	32
plot_21	bx11	fiorina	bx1	4.5	JA	1.5825
plot_21	bx11	fiorina	bx1	4.5	JA_Ile	0.6275
plot_21	bx11	fiorina	bx1	4.5	OPDA	4.15
plot_22	WT11	fiorina	WT	13.5	SA	43.2258
plot_22	WT11	fiorina	WT	13.5	ABA	34.4086
plot_22	WT11	fiorina	WT	13.5	JA	0.36129
plot_22	WT11	fiorina	WT	13.5	JA_Ile	0.169462
plot_22	WT11	fiorina	WT	13.5	OPDA	2.36559
plot_23	bx12	fiorina	bx1	22.5	SA	77.0526
plot_23	bx12	fiorina	bx1	22.5	ABA	33.6842
plot_23	bx12	fiorina	bx1	22.5	JA	3.68421
plot_23	bx12	fiorina	bx1	22.5	JA_Ile	2.48421
plot_23	bx12	fiorina	bx1	22.5	OPDA	3.53684
plot_24	WT12	fiorina	WT	31.5	SA	53.2
plot_24	WT12	fiorina	WT	31.5	ABA	30
plot_24	WT12	fiorina	WT	31.5	JA	0.474
plot_24	WT12	fiorina	WT	31.5	JA_Ile	0.26
plot_24	WT12	fiorina	WT	31.5	OPDA	2.12
plot_25	bx13	fiorina	bx1	40.5	SA	78.8785
plot_25	bx13	fiorina	bx1	40.5	ABA	30.8411
plot_25	bx13	fiorina	bx1	40.5	JA	4.57944
plot_25	bx13	fiorina	bx1	40.5	JA_Ile	2.03738
plot_25	bx13	fiorina	bx1	40.5	OPDA	2.8785
plot_26	WT13	fiorina	WT	49.5	SA	54.4
plot_26	WT13	fiorina	WT	49.5	ABA	36.8
plot_26	WT13	fiorina	WT	49.5	JA	0.718
plot_26	WT13	fiorina	WT	49.5	JA_Ile	0.4
plot_26	WT13	fiorina	WT	49.5	OPDA	4.1
plot_27	bx14	fiorina	bx1	58.5	SA	68.6667
plot_27	bx14	fiorina	bx1	58.5	ABA	34
plot_27	bx14	fiorina	bx1	58.5	JA	0.568889
plot_27	bx14	fiorina	bx1	58.5	JA_Ile	0.277778
plot_27	bx14	fiorina	bx1	58.5	OPDA	1.84222
plot_28	WT14	fiorina	WT	67.5	SA	63.8182
plot_28	WT14	fiorina	WT	67.5	ABA	28.5455
plot_28	WT14	fiorina	WT	67.5	JA	2.87273
plot_28	WT14	fiorina	WT	67.5	JA_Ile	2.18182
plot_28	WT14	fiorina	WT	67.5	OPDA	2.67273
plot_29	bx15	fiorina	bx1	76.5	SA	68.1481
plot_29	bx15	fiorina	bx1	76.5	ABA	31.2963
plot_29	bx15	fiorina	bx1	76.5	JA	0.911111
plot_29	bx15	fiorina	bx1	76.5	JA_Ile	0.325926
plot_29	bx15	fiorina	bx1	76.5	OPDA	2.64815
plot_30	WT15	fiorina	WT	85.5	SA	68.2243
plot_30	WT15	fiorina	WT	85.5	ABA	40.3738
plot_30	WT15	fiorina	WT	85.5	JA	2.69159
plot_30	WT15	fiorina	WT	85.5	JA_Ile	0.891589
plot_30	WT15	fiorina	WT	85.5	OPDA	3.28972
plot_31	bx16	claro	bx1	4.5	SA	273.684
plot_31	bx16	claro	bx1	4.5	ABA	18.9474
plot_31	bx16	claro	bx1	4.5	JA	0.994737
plot_31	bx16	claro	bx1	4.5	JA_Ile	0.326316
plot_31	bx16	claro	bx1	4.5	OPDA	4.17544
plot_32	WT16	claro	WT	13.5	SA	221.739
plot_32	WT16	claro	WT	13.5	ABA	20.6957
plot_32	WT16	claro	WT	13.5	JA	0.413043
plot_32	WT16	claro	WT	13.5	JA_Ile	0.157826
plot_32	WT16	claro	WT	13.5	OPDA	3.15217
plot_33	bx17	claro	bx1	22.5	SA	98.4783
plot_33	bx17	claro	bx1	22.5	ABA	24.5652
plot_33	bx17	claro	bx1	22.5	JA	0.271739
plot_33	bx17	claro	bx1	22.5	JA_Ile	0.124783
plot_33	bx17	claro	bx1	22.5	OPDA	3.97826
plot_34	WT17	claro	WT	31.5	SA	306.818
plot_34	WT17	claro	WT	31.5	ABA	24.0909
plot_34	WT17	claro	WT	31.5	JA	0.456818
plot_34	WT17	claro	WT	31.5	JA_Ile	0.206591
plot_34	WT17	claro	WT	31.5	OPDA	3.47727
plot_35	bx18	claro	bx1	40.5	SA	166.852
plot_35	bx18	claro	bx1	40.5	ABA	23.3333
plot_35	bx18	claro	bx1	40.5	JA	0.488889
plot_35	bx18	claro	bx1	40.5	JA_Ile	0.166481
plot_35	bx18	claro	bx1	40.5	OPDA	3.35185
plot_36	WT18	claro	WT	49.5	SA	318.868
plot_36	WT18	claro	WT	49.5	ABA	25.0943
plot_36	WT18	claro	WT	49.5	JA	0.524528
plot_36	WT18	claro	WT	49.5	JA_Ile	0.192453
plot_36	WT18	claro	WT	49.5	OPDA	4.03774
plot_37	bx19	claro	bx1	58.5	SA	244.86
plot_37	bx19	claro	bx1	58.5	ABA	21.6822
plot_37	bx19	claro	bx1	58.5	JA	0.207477
plot_37	bx19	claro	bx1	58.5	JA_Ile	0.0880374
plot_37	bx19	claro	bx1	58.5	OPDA	3.15888
plot_38	WT19	claro	WT	67.5	SA	NA
plot_38	WT19	claro	WT	67.5	ABA	21.25
plot_38	WT19	claro	WT	67.5	JA	0.583333
plot_38	WT19	claro	WT	67.5	JA_Ile	0.1725
plot_38	WT19	claro	WT	67.5	OPDA	4.1875
plot_39	bx20	claro	bx1	76.5	SA	160
plot_39	bx20	claro	bx1	76.5	ABA	23.0435
plot_39	bx20	claro	bx1	76.5	JA	0.623913
plot_39	bx20	claro	bx1	76.5	JA_Ile	0.202609
plot_39	bx20	claro	bx1	76.5	OPDA	5.17391
plot_40	WT20	claro	WT	85.5	SA	135.048
plot_40	WT20	claro	WT	85.5	ABA	25.9048
plot_40	WT20	claro	WT	85.5	JA	0.598095
plot_40	WT20	claro	WT	85.5	JA_Ile	0.392381
plot_40	WT20	claro	WT	85.5	OPDA	2.07619
plot_41	bx21	sailor	bx1	4.5	SA	144.944
plot_41	bx21	sailor	bx1	4.5	ABA	13.7303
plot_41	bx21	sailor	bx1	4.5	JA	0.426966
plot_41	bx21	sailor	bx1	4.5	JA_Ile	0.0898876
plot_41	bx21	sailor	bx1	4.5	OPDA	2.65169
plot_42	WT21	sailor	WT	13.5	SA	37.1429
plot_42	WT21	sailor	WT	13.5	ABA	8.47059
plot_42	WT21	sailor	WT	13.5	JA	0.228571
plot_42	WT21	sailor	WT	13.5	JA_Ile	0.0653782
plot_42	WT21	sailor	WT	13.5	OPDA	1.0605
plot_43	bx22	sailor	bx1	22.5	SA	83.7288
plot_43	bx22	sailor	bx1	22.5	ABA	14
plot_43	bx22	sailor	bx1	22.5	JA	0.288136
plot_43	bx22	sailor	bx1	22.5	JA_Ile	0.080339
plot_43	bx22	sailor	bx1	22.5	OPDA	2.94915
plot_44	WT22	sailor	WT	31.5	SA	64.5902
plot_44	WT22	sailor	WT	31.5	ABA	14.3115
plot_44	WT22	sailor	WT	31.5	JA	NA
plot_44	WT22	sailor	WT	31.5	JA_Ile	NA
plot_44	WT22	sailor	WT	31.5	OPDA	NA
plot_45	bx23	sailor	bx1	40.5	SA	78.1609
plot_45	bx23	sailor	bx1	40.5	ABA	13.3333
plot_45	bx23	sailor	bx1	40.5	JA	0.103678
plot_45	bx23	sailor	bx1	40.5	JA_Ile	0.0505747
plot_45	bx23	sailor	bx1	40.5	OPDA	0.901149
plot_46	WT23	sailor	WT	49.5	SA	93.4545
plot_46	WT23	sailor	WT	49.5	ABA	11.6545
plot_46	WT23	sailor	WT	49.5	JA	0.0823636
plot_46	WT23	sailor	WT	49.5	JA_Ile	0.04
plot_46	WT23	sailor	WT	49.5	OPDA	1.02545
plot_47	bx24	sailor	bx1	58.5	SA	78.9691
plot_47	bx24	sailor	bx1	58.5	ABA	13.0309
plot_47	bx24	sailor	bx1	58.5	JA	0.350515
plot_47	bx24	sailor	bx1	58.5	JA_Ile	0.206186
plot_47	bx24	sailor	bx1	58.5	OPDA	1.07423
plot_48	WT24	sailor	WT	67.5	SA	81.4737
plot_48	WT24	sailor	WT	67.5	ABA	13.8737
plot_48	WT24	sailor	WT	67.5	JA	0.311579
plot_48	WT24	sailor	WT	67.5	JA_Ile	0.0911579
plot_48	WT24	sailor	WT	67.5	OPDA	2.50526
plot_49	bx25	sailor	bx1	76.5	SA	81.8349
plot_49	bx25	sailor	bx1	76.5	ABA	13.9817
plot_49	bx25	sailor	bx1	76.5	JA	0.209174
plot_49	bx25	sailor	bx1	76.5	JA_Ile	0.0647706
plot_49	bx25	sailor	bx1	76.5	OPDA	2.84404
plot_50	WT25	sailor	WT	85.5	SA	100.449
plot_50	WT25	sailor	WT	85.5	ABA	13.6629
plot_50	WT25	sailor	WT	85.5	JA	0.325843
plot_50	WT25	sailor	WT	85.5	JA_Ile	0.174157
plot_50	WT25	sailor	WT	85.5	OPDA	1.87416
plot_51	bx26	sailor	bx1	4.5	SA	59.2523
plot_51	bx26	sailor	bx1	4.5	ABA	11.8879
plot_51	bx26	sailor	bx1	4.5	JA	0.613084
plot_51	bx26	sailor	bx1	4.5	JA_Ile	0.218692
plot_51	bx26	sailor	bx1	4.5	OPDA	2.39252
plot_52	WT26	sailor	WT	13.5	SA	91.8261
plot_52	WT26	sailor	WT	13.5	ABA	13.913
plot_52	WT26	sailor	WT	13.5	JA	0.111826
plot_52	WT26	sailor	WT	13.5	JA_Ile	0.0523478
plot_52	WT26	sailor	WT	13.5	OPDA	1.06435
plot_53	bx27	sailor	bx1	22.5	SA	41.3084
plot_53	bx27	sailor	bx1	22.5	ABA	13.5701
plot_53	bx27	sailor	bx1	22.5	JA	NA
plot_53	bx27	sailor	bx1	22.5	JA_Ile	NA
plot_53	bx27	sailor	bx1	22.5	OPDA	1.90654
plot_54	WT27	sailor	WT	31.5	SA	47.5
plot_54	WT27	sailor	WT	31.5	ABA	11.125
plot_54	WT27	sailor	WT	31.5	JA	0.103214
plot_54	WT27	sailor	WT	31.5	JA_Ile	0.0464286
plot_54	WT27	sailor	WT	31.5	OPDA	1.56786
plot_55	bx28	sailor	bx1	40.5	SA	62.5688
plot_55	bx28	sailor	bx1	40.5	ABA	12.6789
plot_55	bx28	sailor	bx1	40.5	JA	0.182569
plot_55	bx28	sailor	bx1	40.5	JA_Ile	0.105688
plot_55	bx28	sailor	bx1	40.5	OPDA	1.22752
plot_56	WT28	sailor	WT	49.5	SA	98.4762
plot_56	WT28	sailor	WT	49.5	ABA	12.5524
plot_56	WT28	sailor	WT	49.5	JA	0.422857
plot_56	WT28	sailor	WT	49.5	JA_Ile	0.170667
plot_56	WT28	sailor	WT	49.5	OPDA	1.22667
plot_57	bx29	sailor	bx1	58.5	SA	114.082
plot_57	bx29	sailor	bx1	58.5	ABA	11.4898
plot_57	bx29	sailor	bx1	58.5	JA	0.189592
plot_57	bx29	sailor	bx1	58.5	JA_Ile	0.0481633
plot_57	bx29	sailor	bx1	58.5	OPDA	2.91837
plot_58	WT29	sailor	WT	67.5	SA	103.137
plot_58	WT29	sailor	WT	67.5	ABA	14.6275
plot_58	WT29	sailor	WT	67.5	JA	0.578431
plot_58	WT29	sailor	WT	67.5	JA_Ile	0.22549
plot_58	WT29	sailor	WT	67.5	OPDA	2.11765
plot_59	bx30	sailor	bx1	76.5	SA	77.1739
plot_59	bx30	sailor	bx1	76.5	ABA	13.3478
plot_59	bx30	sailor	bx1	76.5	JA	0.184348
plot_59	bx30	sailor	bx1	76.5	JA_Ile	0.11087
plot_59	bx30	sailor	bx1	76.5	OPDA	1.86087
plot_60	WT30	sailor	WT	85.5	SA	93.9024
plot_60	WT30	sailor	WT	85.5	ABA	16.1707
plot_60	WT30	sailor	WT	85.5	JA	0.829268
plot_60	WT30	sailor	WT	85.5	JA_Ile	0.282927
plot_60	WT30	sailor	WT	85.5	OPDA	1.20244
