# Supplementary material for: Plant secondary metabolite-dependent plant-soil feedbacks can improve crop yield in the field
Source: eLife. 2023 Aug 1;12:e84988. doi: 10.7554/eLife.84988 (PMC10393292; doi:10.7554/eLife.84988)
Supplement: Figure 5—source data 1. [file elife-84988-fig5-data1.xlsx]

## Sheet: Figure_5
sample_nr	plot_id	sample_id	wheat_var	conditioning	pos_y	tillers_per_m2	tiller_per_plant_mean	dry_weight_m2	dry_weight_per_tiller
Exp_9_01	plot_01	bx01_a	fiorina	bx1	4.5	520	2	1929.36	3.71031
Exp_9_02	plot_01	bx01_b	fiorina	bx1	4.5	392	2.6	1333.52	3.40184
Exp_9_03	plot_02	WT01_a	fiorina	WT	13.5	640	2.8	2303.76	3.55519
Exp_9_04	plot_02	WT01_b	fiorina	WT	13.5	624	3.6	2026.8	3.24808
Exp_9_05	plot_03	bx02_a	fiorina	bx1	22.5	488	2.2	1755.68	3.5977
Exp_9_06	plot_03	bx02_b	fiorina	bx1	22.5	624	2.4	1966.72	3.1119
Exp_9_07	plot_04	WT02_a	fiorina	WT	31.5	472	4.4	1598.72	3.38712
Exp_9_08	plot_04	WT02_b	fiorina	WT	31.5	704	3.6	2414.48	3.42966
Exp_9_09	plot_05	bx03_a	fiorina	bx1	40.5	504	4	1796.56	3.40258
Exp_9_10	plot_05	bx03_b	fiorina	bx1	40.5	496	3.2	1540.8	3.10645
Exp_9_11	plot_06	WT03_a	fiorina	WT	49.5	576	3.6	1797.6	3.12083
Exp_9_12	plot_06	WT03_b	fiorina	WT	49.5	664	3.4	1931.36	2.90867
Exp_9_13	plot_07	bx04_a	fiorina	bx1	58.5	528	2.6	1523.2	2.88485
Exp_9_14	plot_07	bx04_b	fiorina	bx1	58.5	512	3.2	1586.64	3.005
Exp_9_15	plot_08	WT04_a	fiorina	WT	67.5	608	2.6	1864.72	3.02714
Exp_9_16	plot_08	WT04_b	fiorina	WT	67.5	672	2.6	1825.04	2.71583
Exp_9_17	plot_09	bx05_a	fiorina	bx1	76.5	456	2.4	1347.76	2.80783
Exp_9_18	plot_09	bx05_b	fiorina	bx1	76.5	552	3.6	1861.92	3.32486
Exp_9_19	plot_10	WT05_a	fiorina	WT	85.5	496	4.6	1548.56	2.978
Exp_9_20	plot_10	WT05_b	fiorina	WT	85.5	560	3.8	1553.6	2.77429
Exp_9_21	plot_11	bx06_a	claro	bx1	4.5	448	1.8	1583.2	3.47193
Exp_9_22	plot_11	bx06_b	claro	bx1	4.5	400	2.4	1356.56	3.3914
Exp_9_23	plot_12	WT06_a	claro	WT	13.5	496	3.4	1636.08	3.29855
Exp_9_24	plot_12	WT06_b	claro	WT	13.5	496	2.8	1531.6	3.0879
Exp_9_25	plot_13	bx07_a	claro	bx1	22.5	440	2.4	1408.56	3.20127
Exp_9_26	plot_13	bx07_b	claro	bx1	22.5	384	2.6	1297.44	3.2436
Exp_9_27	plot_14	WT07_a	claro	WT	31.5	568	2.6	1869.6	3.29155
Exp_9_28	plot_14	WT07_b	claro	WT	31.5	592	2.8	1983.68	3.26263
Exp_9_29	plot_15	bx08_a	claro	bx1	40.5	560	2.4	1678.16	2.99671
Exp_9_30	plot_15	bx08_b	claro	bx1	40.5	416	2.6	1388.8	3.27547
Exp_9_31	plot_16	WT08_a	claro	WT	49.5	456	3.8	1267.52	2.77965
Exp_9_32	plot_16	WT08_b	claro	WT	49.5	560	4	1738.56	3.01833
Exp_9_33	plot_17	bx09_a	claro	bx1	58.5	392	2	1244.48	3.17469
Exp_9_34	plot_17	bx09_b	claro	bx1	58.5	536	2.6	1606.08	2.99642
Exp_9_35	plot_18	WT09_a	claro	WT	67.5	424	3.4	1425.12	3.23891
Exp_9_36	plot_18	WT09_b	claro	WT	67.5	472	2.6	1682.16	3.5639
Exp_9_37	plot_19	bx10_a	claro	bx1	76.5	352	3.4	1234.56	3.50727
Exp_9_38	plot_19	bx10_b	claro	bx1	76.5	416	2.6	1499.12	3.47019
Exp_9_39	plot_20	WT10_a	claro	WT	85.5	576	3.4	1954.4	3.39306
Exp_9_40	plot_20	WT10_b	claro	WT	85.5	512	3.4	1274.64	2.45123
Exp_9_41	plot_21	bx11_a	fiorina	bx1	4.5	376	2.6	1328.4	3.38878
Exp_9_42	plot_21	bx11_b	fiorina	bx1	4.5	496	2.8	1597.12	3.22
Exp_9_43	plot_22	WT11_a	fiorina	WT	13.5	624	3.2	2009.84	3.18013
Exp_9_44	plot_22	WT11_b	fiorina	WT	13.5	680	3.4	2108.88	3.03
Exp_9_45	plot_23	bx12_a	fiorina	bx1	22.5	512	2	1746.16	3.41047
Exp_9_46	plot_23	bx12_b	fiorina	bx1	22.5	368	2	1173.2	3.12021
Exp_9_47	plot_24	WT12_a	fiorina	WT	31.5	416	3.2	1325.92	3.12717
Exp_9_48	plot_24	WT12_b	fiorina	WT	31.5	592	2.6	1853.28	3.13054
Exp_9_49	plot_25	bx13_a	fiorina	bx1	40.5	424	2.6	1437.76	3.39094
Exp_9_50	plot_25	bx13_b	fiorina	bx1	40.5	496	2.4	1585.28	3.00242
Exp_9_51	plot_26	WT13_a	fiorina	WT	49.5	528	3.4	1787.68	3.23855
Exp_9_52	plot_26	WT13_b	fiorina	WT	49.5	632	3.6
Exp_9_53	plot_27	bx14_a	fiorina	bx1	58.5	560	3.4	1654.24	2.91239
Exp_9_54	plot_27	bx14_b	fiorina	bx1	58.5	552	3.2	1619.84	2.93449
Exp_9_55	plot_28	WT14_a	fiorina	WT	67.5	504	3.4	1478	2.88672
Exp_9_56	plot_28	WT14_b	fiorina	WT	67.5	488	2.4	1844.8	3.78033
Exp_9_57	plot_29	bx15_a	fiorina	bx1	76.5	448	2.4	1637.6	3.59123
Exp_9_58	plot_29	bx15_b	fiorina	bx1	76.5	528	3	1574.88	2.98273
Exp_9_59	plot_30	WT15_a	fiorina	WT	85.5	664	2.4	1800.64	2.71181
Exp_9_60	plot_30	WT15_b	fiorina	WT	85.5	648	3.6	1936.8	2.98889
Exp_9_61	plot_31	bx16_a	claro	bx1	4.5	400	2.2	1418.64	3.5466
Exp_9_62	plot_31	bx16_b	claro	bx1	4.5	496	2.6	1816.96	3.66323
Exp_9_63	plot_32	WT16_a	claro	WT	13.5	424	3.4	1465.2	3.45566
Exp_9_64	plot_32	WT16_b	claro	WT	13.5	424	3	1513.28	3.56906
Exp_9_65	plot_33	bx17_a	claro	bx1	22.5	440	1.6	1644	3.73636
Exp_9_66	plot_33	bx17_b	claro	bx1	22.5	296	2	1055.36	3.56541
Exp_9_67	plot_34	WT17_a	claro	WT	31.5	456	2.8	1379.52	3.02526
Exp_9_68	plot_34	WT17_b	claro	WT	31.5	440	2.6	1678.96	3.81582
Exp_9_69	plot_35	bx18_a	claro	bx1	40.5	432	3.2	1559.52	3.61
Exp_9_70	plot_35	bx18_b	claro	bx1	40.5	384	3.2	1272.24	3.31312
Exp_9_71	plot_36	WT18_a	claro	WT	49.5	456	2.4	1545.44	3.06635
Exp_9_72	plot_36	WT18_b	claro	WT	49.5	504	2.8	1736.16	3.44476
Exp_9_73	plot_37	bx19_a	claro	bx1	58.5	376	3	1255.04	3.26833
Exp_9_74	plot_37	bx19_b	claro	bx1	58.5	312	2.2	1173.84	3.66825
Exp_9_75	plot_38	WT19_a	claro	WT	67.5	560	4.4	1855.2	3.31286
Exp_9_76	plot_38	WT19_b	claro	WT	67.5	320	3.8	1141.04	3.56575
Exp_9_77	plot_39	bx20_a	claro	bx1	76.5	320	2.6	1205.2	3.5869
Exp_9_78	plot_39	bx20_b	claro	bx1	76.5	504	3	1712.8	3.34531
Exp_9_79	plot_40	WT20_a	claro	WT	85.5	488	2.8	1541.36	3.15852
Exp_9_80	plot_40	WT20_b	claro	WT	85.5	512	2.8	1783.44	3.42969
Exp_9_81	plot_41	bx21_a	sailor	bx1	4.5	552	2.6	1637.84	2.9671
Exp_9_82	plot_41	bx21_b	sailor	bx1	4.5	584	3.8	1560.96	2.63676
Exp_9_83	plot_42	WT21_a	sailor	WT	13.5	640	3.2	1886.24	2.94725
Exp_9_84	plot_42	WT21_b	sailor	WT	13.5	680	4.4	2097.36	3.08435
Exp_9_85	plot_43	bx22_a	sailor	bx1	22.5	640	3	1852.32	2.85852
Exp_9_86	plot_43	bx22_b	sailor	bx1	22.5	464	2.8	1628.96	3.51069
Exp_9_87	plot_44	WT22_a	sailor	WT	31.5	752	4	2073.76	2.70021
Exp_9_88	plot_44	WT22_b	sailor	WT	31.5	488	5.8	1233.2	2.52705
Exp_9_89	plot_45	bx23_a	sailor	bx1	40.5	432	2.6	1164.88	2.69648
Exp_9_90	plot_45	bx23_b	sailor	bx1	40.5	504	3	1318.64	2.57547
Exp_9_91	plot_46	WT23_a	sailor	WT	49.5	648	3.8	1663.2	2.56667
Exp_9_92	plot_46	WT23_b	sailor	WT	49.5	624	3	1830	2.93269
Exp_9_93	plot_47	bx24_a	sailor	bx1	58.5	680	2.6	1745.68	2.42456
Exp_9_94	plot_47	bx24_b	sailor	bx1	58.5	456	3.6	1059.84	2.32421
Exp_9_95	plot_48	WT24_a	sailor	WT	67.5	664	4.4	1565.04	2.35699
Exp_9_96	plot_48	WT24_b	sailor	WT	67.5	696	3.6	1663.84	2.33685
Exp_9_97	plot_49	bx25_a	sailor	bx1	76.5	464	3	995.04	2.14448
Exp_9_98	plot_49	bx25_b	sailor	bx1	76.5	456	3	1115.12	2.44544
Exp_9_99	plot_50	WT25_a	sailor	WT	85.5	680	5.4	2123.04	3.01568
Exp_9_100	plot_50	WT25_b	sailor	WT	85.5	528	3.2	1515.84	2.87091
Exp_9_101	plot_51	bx26_a	sailor	bx1	4.5	792	2.6	2598.24	3.21564
Exp_9_102	plot_51	bx26_b	sailor	bx1	4.5	672	2.6	1683.28	2.50488
Exp_9_103	plot_52	WT26_a	sailor	WT	13.5	744	5.6	2143.04	2.88043
Exp_9_104	plot_52	WT26_b	sailor	WT	13.5	608	4.8	1862.8	3.06382
Exp_9_105	plot_53	bx27_a	sailor	bx1	22.5	432	2.6	1474.48	3.41315
Exp_9_106	plot_53	bx27_b	sailor	bx1	22.5	728	3.2	2478.4	3.4044
Exp_9_107	plot_54	WT27_a	sailor	WT	31.5	576	3.8	1461.76	2.46919
Exp_9_108	plot_54	WT27_b	sailor	WT	31.5	776	5.2	1883.12	2.4267
Exp_9_109	plot_55	bx28_a	sailor	bx1	40.5	432	3.2	1138.32	2.635
Exp_9_110	plot_55	bx28_b	sailor	bx1	40.5	440	3.4	1113.68	2.40017
Exp_9_111	plot_56	WT28_a	sailor	WT	49.5	760	3.6	1986	2.58594
Exp_9_112	plot_56	WT28_b	sailor	WT	49.5	856	4.8	2062.72	2.38741
Exp_9_113	plot_57	bx29_a	sailor	bx1	58.5	792	2.6	1935.2	2.44343
Exp_9_114	plot_57	bx29_b	sailor	bx1	58.5	504	3.2	1445.04	2.86714
Exp_9_115	plot_58	WT29_a	sailor	WT	67.5	704	3.4	1980.08	2.78101
Exp_9_116	plot_58	WT29_b	sailor	WT	67.5	608	4.8	1485.76	2.44368
Exp_9_117	plot_59	bx30_a	sailor	bx1	76.5	592	3.2	1348	2.27703
Exp_9_118	plot_59	bx30_b	sailor	bx1	76.5	488	2.2	1260.56	2.58311
Exp_9_119	plot_60	WT30_a	sailor	WT	85.5	672	3.4	1866.24	2.74447
Exp_9_120	plot_60	WT30_b	sailor	WT	85.5	696	4	1833.92	2.57573
