# Supplementary material for: Plant secondary metabolite-dependent plant-soil feedbacks can improve crop yield in the field
Source: eLife. 2023 Aug 1;12:e84988. doi: 10.7554/eLife.84988 (PMC10393292; doi:10.7554/eLife.84988)
Supplement: Figure 6—source data 1. [file elife-84988-fig6-data1.xlsx]

## Sheet: Figure_6A-E
plot_id	wheat_var	conditioning	pos_y	sample_id	yield_m2	tkw	protein	zeleny	dough_stability
plot_01	fiorina	bx1	4.5	bx01	738.724	48.55	12.7	52	1.7
plot_02	fiorina	WT	13.5	WT01	724.755	48.59	13.1	52	1.5
plot_03	fiorina	bx1	22.5	bx02	724.855	48.86	12.3	46	5.2
plot_04	fiorina	WT	31.5	WT02	825.733	46.54	12	44	4.6
plot_05	fiorina	bx1	40.5	bx03	760.204	44.8	11.7	44	4.2
plot_06	fiorina	WT	49.5	WT03	774.672	47.36	12.1	44	0.7
plot_07	fiorina	bx1	58.5	bx04	695.261	42.76	11.7	43	0.5
plot_08	fiorina	WT	67.5	WT04	780.214	44.88	11.3	44	4.3
plot_09	fiorina	bx1	76.5	bx05	730.088	44.5	11.2	45	5.6
plot_10	fiorina	WT	85.5	WT05	774.403	44.31	12.1	50	5.1
plot_11	claro	bx1	4.5	bx06	779.799	43.59	12.6	64	2
plot_12	claro	WT	13.5	WT06	800.312	44.73	13	65	7.9
plot_13	claro	bx1	22.5	bx07	766.312	43.71	12.9	66	6.6
plot_14	claro	WT	31.5	WT07	822.736	43.14	12.5	56	0.4
plot_15	claro	bx1	40.5	bx08	776.228	42.95	12.9	62	4.7
plot_16	claro	WT	49.5	WT08	777.469	41.2	12.6	63	2.4
plot_17	claro	bx1	58.5	bx09	701.605	41.57	12.8	58	5.3
plot_18	claro	WT	67.5	WT09	710.014	39.98	12.7	63	1.6
plot_19	claro	bx1	76.5	bx10	625.917	41.77	13.2	62	0.6
plot_20	claro	WT	85.5	WT10	720.013	45.44	12.8	63	0.6
plot_21	fiorina	bx1	4.5	bx11	702.402	45.23	13.3	53	3.3
plot_22	fiorina	WT	13.5	WT11	844.777	46.59	12.5	54	2.4
plot_23	fiorina	bx1	22.5	bx12	764.715	46.65	12.7	49	2.8
plot_24	fiorina	WT	31.5	WT12	794.235	42.3	11.9	47	5.7
plot_25	fiorina	bx1	40.5	bx13	716.329	45.83	12.7	49	0.6
plot_26	fiorina	WT	49.5	WT13	733.871	44.04	12	46	0.7
plot_27	fiorina	bx1	58.5	bx14	731.779	38.9	12.5	48	2.1
plot_28	fiorina	WT	67.5	WT14	737.578	44.63	12.1	45	5
plot_29	fiorina	bx1	76.5	bx15	718.723	45.25	12.1	45	3.7
plot_30	fiorina	WT	85.5	WT15	678.463	44.85	12.7	50	3.8
plot_31	claro	bx1	4.5	bx16	805.17	46.64	12.9	51	7.8
plot_32	claro	WT	13.5	WT16	861.652	46.24	12.9	63	1.8
plot_33	claro	bx1	22.5	bx17	834.487	45.5	13.9	64	0.5
plot_34	claro	WT	31.5	WT17	834.884	42.78	11.6	62	5.8
plot_35	claro	bx1	40.5	bx18	764.714	42.46	12.5	52	5.7
plot_36	claro	WT	49.5	WT18	793.328	44.33	11.2	49	2.4
plot_37	claro	bx1	58.5	bx19	811.406	42.37	12.4	50	0.6
plot_38	claro	WT	67.5	WT19	854.364	45.72	11.9	50	0.4
plot_39	claro	bx1	76.5	bx20	822.81	45.84	12.1	55	5.6
plot_40	claro	WT	85.5	WT20	853.659	46.98	13	57	2.6

## Sheet: Figure_6F
plot_id	sample_id	wheat_var	conditioning	pos_y	element	quantity
plot_01	bx01	fiorina	bx1	4.5	Mg	1351.99
plot_01	bx01	fiorina	bx1	4.5	P	3804.21
plot_01	bx01	fiorina	bx1	4.5	K	3780.9
plot_01	bx01	fiorina	bx1	4.5	Ca	47.5691
plot_01	bx01	fiorina	bx1	4.5	Mn	44.7181
plot_01	bx01	fiorina	bx1	4.5	Na	6.47346
plot_01	bx01	fiorina	bx1	4.5	Al	1.10654
plot_01	bx01	fiorina	bx1	4.5	V	0.00158445
plot_01	bx01	fiorina	bx1	4.5	Cr	0.0605524
plot_01	bx01	fiorina	bx1	4.5	Fe	27.906
plot_01	bx01	fiorina	bx1	4.5	Ni	0.21201
plot_01	bx01	fiorina	bx1	4.5	Cu	7.07744
plot_01	bx01	fiorina	bx1	4.5	Zn	25.7917
plot_01	bx01	fiorina	bx1	4.5	Ga	0.750411
plot_01	bx01	fiorina	bx1	4.5	As	0.00647146
plot_01	bx01	fiorina	bx1	4.5	Rb	3.39258
plot_01	bx01	fiorina	bx1	4.5	Sr	1.86455
plot_01	bx01	fiorina	bx1	4.5	Cd	0.0397086
plot_01	bx01	fiorina	bx1	4.5	Cs	0.00493318
plot_01	bx01	fiorina	bx1	4.5	Ba	2.97075
plot_01	bx01	fiorina	bx1	4.5	Ce	0.000550161
plot_02	WT01	fiorina	WT	13.5	Mg	1597.87
plot_02	WT01	fiorina	WT	13.5	P	4346.91
plot_02	WT01	fiorina	WT	13.5	K	4183.61
plot_02	WT01	fiorina	WT	13.5	Ca	50.212
plot_02	WT01	fiorina	WT	13.5	Mn	44.0081
plot_02	WT01	fiorina	WT	13.5	Na	6.01886
plot_02	WT01	fiorina	WT	13.5	Al	0.955377
plot_02	WT01	fiorina	WT	13.5	V	0.0012881
plot_02	WT01	fiorina	WT	13.5	Cr	0.041529
plot_02	WT01	fiorina	WT	13.5	Fe	34.1557
plot_02	WT01	fiorina	WT	13.5	Ni	0.124062
plot_02	WT01	fiorina	WT	13.5	Cu	8.1866
plot_02	WT01	fiorina	WT	13.5	Zn	26.764
plot_02	WT01	fiorina	WT	13.5	Ga	0.926929
plot_02	WT01	fiorina	WT	13.5	As	0.00567264
plot_02	WT01	fiorina	WT	13.5	Rb	2.05172
plot_02	WT01	fiorina	WT	13.5	Sr	1.87359
plot_02	WT01	fiorina	WT	13.5	Cd	0.0411263
plot_02	WT01	fiorina	WT	13.5	Cs	0.0020288
plot_02	WT01	fiorina	WT	13.5	Ba	3.65329
plot_02	WT01	fiorina	WT	13.5	Ce	0.000510772
plot_03	bx02	fiorina	bx1	22.5	Mg	1431.36
plot_03	bx02	fiorina	bx1	22.5	P	3887.89
plot_03	bx02	fiorina	bx1	22.5	K	3889.6
plot_03	bx02	fiorina	bx1	22.5	Ca	43.597
plot_03	bx02	fiorina	bx1	22.5	Mn	49.2357
plot_03	bx02	fiorina	bx1	22.5	Na	5.84416
plot_03	bx02	fiorina	bx1	22.5	Al	1.69802
plot_03	bx02	fiorina	bx1	22.5	V	0.00220922
plot_03	bx02	fiorina	bx1	22.5	Cr	0.0644409
plot_03	bx02	fiorina	bx1	22.5	Fe	31.5974
plot_03	bx02	fiorina	bx1	22.5	Ni	0.136325
plot_03	bx02	fiorina	bx1	22.5	Cu	7.56065
plot_03	bx02	fiorina	bx1	22.5	Zn	24.0435
plot_03	bx02	fiorina	bx1	22.5	Ga	0.822136
plot_03	bx02	fiorina	bx1	22.5	As	0.00590289
plot_03	bx02	fiorina	bx1	22.5	Rb	1.97772
plot_03	bx02	fiorina	bx1	22.5	Sr	1.68091
plot_03	bx02	fiorina	bx1	22.5	Cd	0.0331864
plot_03	bx02	fiorina	bx1	22.5	Cs	0.00183018
plot_03	bx02	fiorina	bx1	22.5	Ba	3.3086
plot_03	bx02	fiorina	bx1	22.5	Ce	0.000892647
plot_04	WT02	fiorina	WT	31.5	Mg	1279.3
plot_04	WT02	fiorina	WT	31.5	P	3510.89
plot_04	WT02	fiorina	WT	31.5	K	3722.21
plot_04	WT02	fiorina	WT	31.5	Ca	56.1046
plot_04	WT02	fiorina	WT	31.5	Mn	37.6581
plot_04	WT02	fiorina	WT	31.5	Na	6.00743
plot_04	WT02	fiorina	WT	31.5	Al	1.06733
plot_04	WT02	fiorina	WT	31.5	V	0.00223078
plot_04	WT02	fiorina	WT	31.5	Cr	0.0641831
plot_04	WT02	fiorina	WT	31.5	Fe	25.9786
plot_04	WT02	fiorina	WT	31.5	Ni	0.14779
plot_04	WT02	fiorina	WT	31.5	Cu	6.56786
plot_04	WT02	fiorina	WT	31.5	Zn	21.582
plot_04	WT02	fiorina	WT	31.5	Ga	0.820944
plot_04	WT02	fiorina	WT	31.5	As	0.00595859
plot_04	WT02	fiorina	WT	31.5	Rb	1.08882
plot_04	WT02	fiorina	WT	31.5	Sr	1.94181
plot_04	WT02	fiorina	WT	31.5	Cd	0.0238953
plot_04	WT02	fiorina	WT	31.5	Cs	0.00121507
plot_04	WT02	fiorina	WT	31.5	Ba	3.12296
plot_04	WT02	fiorina	WT	31.5	Ce	0.000690865
plot_05	bx03	fiorina	bx1	40.5	Mg	1437.88
plot_05	bx03	fiorina	bx1	40.5	P	3981.55
plot_05	bx03	fiorina	bx1	40.5	K	4182.43
plot_05	bx03	fiorina	bx1	40.5	Ca	51.6028
plot_05	bx03	fiorina	bx1	40.5	Mn	36.1949
plot_05	bx03	fiorina	bx1	40.5	Na	6.7036
plot_05	bx03	fiorina	bx1	40.5	Al	0.929596
plot_05	bx03	fiorina	bx1	40.5	V	0.0012256
plot_05	bx03	fiorina	bx1	40.5	Cr	0.0444124
plot_05	bx03	fiorina	bx1	40.5	Fe	30.1552
plot_05	bx03	fiorina	bx1	40.5	Ni	0.130593
plot_05	bx03	fiorina	bx1	40.5	Cu	7.53671
plot_05	bx03	fiorina	bx1	40.5	Zn	22.1332
plot_05	bx03	fiorina	bx1	40.5	Ga	0.97481
plot_05	bx03	fiorina	bx1	40.5	As	0.0056262
plot_05	bx03	fiorina	bx1	40.5	Rb	1.35084
plot_05	bx03	fiorina	bx1	40.5	Sr	2.215
plot_05	bx03	fiorina	bx1	40.5	Cd	0.0238161
plot_05	bx03	fiorina	bx1	40.5	Cs	0.00131993
plot_05	bx03	fiorina	bx1	40.5	Ba	3.72231
plot_05	bx03	fiorina	bx1	40.5	Ce	0.000409326
plot_06	WT03	fiorina	WT	49.5	Mg	1460.48
plot_06	WT03	fiorina	WT	49.5	P	4014.86
plot_06	WT03	fiorina	WT	49.5	K	4170.35
plot_06	WT03	fiorina	WT	49.5	Ca	49.3086
plot_06	WT03	fiorina	WT	49.5	Mn	36.2384
plot_06	WT03	fiorina	WT	49.5	Na	7.24422
plot_06	WT03	fiorina	WT	49.5	Al	1.54552
plot_06	WT03	fiorina	WT	49.5	V	0.00263937
plot_06	WT03	fiorina	WT	49.5	Cr	0.0784539
plot_06	WT03	fiorina	WT	49.5	Fe	31.3956
plot_06	WT03	fiorina	WT	49.5	Ni	0.141327
plot_06	WT03	fiorina	WT	49.5	Cu	7.98574
plot_06	WT03	fiorina	WT	49.5	Zn	22.5188
plot_06	WT03	fiorina	WT	49.5	Ga	1.05632
plot_06	WT03	fiorina	WT	49.5	As	0.00608002
plot_06	WT03	fiorina	WT	49.5	Rb	1.28533
plot_06	WT03	fiorina	WT	49.5	Sr	2.19887
plot_06	WT03	fiorina	WT	49.5	Cd	0.0238047
plot_06	WT03	fiorina	WT	49.5	Cs	0.00169356
plot_06	WT03	fiorina	WT	49.5	Ba	3.83453
plot_06	WT03	fiorina	WT	49.5	Ce	0.000472646
plot_07	bx04	fiorina	bx1	58.5	Mg	1430.54
plot_07	bx04	fiorina	bx1	58.5	P	4030.08
plot_07	bx04	fiorina	bx1	58.5	K	4212.61
plot_07	bx04	fiorina	bx1	58.5	Ca	52.6663
plot_07	bx04	fiorina	bx1	58.5	Mn	35.2785
plot_07	bx04	fiorina	bx1	58.5	Na	7.30937
plot_07	bx04	fiorina	bx1	58.5	Al	1.28095
plot_07	bx04	fiorina	bx1	58.5	V	0.00181997
plot_07	bx04	fiorina	bx1	58.5	Cr	0.0597697
plot_07	bx04	fiorina	bx1	58.5	Fe	30.2042
plot_07	bx04	fiorina	bx1	58.5	Ni	0.152971
plot_07	bx04	fiorina	bx1	58.5	Cu	7.62151
plot_07	bx04	fiorina	bx1	58.5	Zn	22.6108
plot_07	bx04	fiorina	bx1	58.5	Ga	0.858242
plot_07	bx04	fiorina	bx1	58.5	As	0.00499122
plot_07	bx04	fiorina	bx1	58.5	Rb	1.92491
plot_07	bx04	fiorina	bx1	58.5	Sr	2.04912
plot_07	bx04	fiorina	bx1	58.5	Cd	0.0244149
plot_07	bx04	fiorina	bx1	58.5	Cs	0.00177473
plot_07	bx04	fiorina	bx1	58.5	Ba	3.07155
plot_07	bx04	fiorina	bx1	58.5	Ce	0.00030127
plot_08	WT04	fiorina	WT	67.5	Mg	1444.38
plot_08	WT04	fiorina	WT	67.5	P	4030.2
plot_08	WT04	fiorina	WT	67.5	K	4231.6
plot_08	WT04	fiorina	WT	67.5	Ca	48.1284
plot_08	WT04	fiorina	WT	67.5	Mn	42.9358
plot_08	WT04	fiorina	WT	67.5	Na	8.24854
plot_08	WT04	fiorina	WT	67.5	Al	1.70556
plot_08	WT04	fiorina	WT	67.5	V	0.00269387
plot_08	WT04	fiorina	WT	67.5	Cr	0.0920183
plot_08	WT04	fiorina	WT	67.5	Fe	31.4193
plot_08	WT04	fiorina	WT	67.5	Ni	0.174076
plot_08	WT04	fiorina	WT	67.5	Cu	7.89874
plot_08	WT04	fiorina	WT	67.5	Zn	22.7618
plot_08	WT04	fiorina	WT	67.5	Ga	0.956225
plot_08	WT04	fiorina	WT	67.5	As	0.00398201
plot_08	WT04	fiorina	WT	67.5	Rb	3.63851
plot_08	WT04	fiorina	WT	67.5	Sr	1.92812
plot_08	WT04	fiorina	WT	67.5	Cd	0.0237654
plot_08	WT04	fiorina	WT	67.5	Cs	0.00325344
plot_08	WT04	fiorina	WT	67.5	Ba	3.30348
plot_08	WT04	fiorina	WT	67.5	Ce	0.000570799
plot_09	bx05	fiorina	bx1	76.5	Mg	1452.11
plot_09	bx05	fiorina	bx1	76.5	P	4072.12
plot_09	bx05	fiorina	bx1	76.5	K	4400.44
plot_09	bx05	fiorina	bx1	76.5	Ca	51.79
plot_09	bx05	fiorina	bx1	76.5	Mn	48.146
plot_09	bx05	fiorina	bx1	76.5	Na	8.51792
plot_09	bx05	fiorina	bx1	76.5	Al	1.15528
plot_09	bx05	fiorina	bx1	76.5	V	0.0013011
plot_09	bx05	fiorina	bx1	76.5	Cr	0.0731423
plot_09	bx05	fiorina	bx1	76.5	Fe	36.5395
plot_09	bx05	fiorina	bx1	76.5	Ni	0.227004
plot_09	bx05	fiorina	bx1	76.5	Cu	8.54039
plot_09	bx05	fiorina	bx1	76.5	Zn	22.9574
plot_09	bx05	fiorina	bx1	76.5	Ga	0.96147
plot_09	bx05	fiorina	bx1	76.5	As	0.00476415
plot_09	bx05	fiorina	bx1	76.5	Rb	4.14459
plot_09	bx05	fiorina	bx1	76.5	Sr	1.92476
plot_09	bx05	fiorina	bx1	76.5	Cd	0.0253536
plot_09	bx05	fiorina	bx1	76.5	Cs	0.00380554
plot_09	bx05	fiorina	bx1	76.5	Ba	3.28671
plot_09	bx05	fiorina	bx1	76.5	Ce	0.000317734
plot_10	WT05	fiorina	WT	85.5	Mg	1263.85
plot_10	WT05	fiorina	WT	85.5	P	3574.22
plot_10	WT05	fiorina	WT	85.5	K	3931.11
plot_10	WT05	fiorina	WT	85.5	Ca	55.5753
plot_10	WT05	fiorina	WT	85.5	Mn	40.6374
plot_10	WT05	fiorina	WT	85.5	Na	8.14954
plot_10	WT05	fiorina	WT	85.5	Al	1.16309
plot_10	WT05	fiorina	WT	85.5	V	0.00170195
plot_10	WT05	fiorina	WT	85.5	Cr	0.0530404
plot_10	WT05	fiorina	WT	85.5	Fe	29.8417
plot_10	WT05	fiorina	WT	85.5	Ni	0.162533
plot_10	WT05	fiorina	WT	85.5	Cu	7.54016
plot_10	WT05	fiorina	WT	85.5	Zn	21.6008
plot_10	WT05	fiorina	WT	85.5	Ga	0.922327
plot_10	WT05	fiorina	WT	85.5	As	0.00516162
plot_10	WT05	fiorina	WT	85.5	Rb	3.26985
plot_10	WT05	fiorina	WT	85.5	Sr	1.7715
plot_10	WT05	fiorina	WT	85.5	Cd	0.0293364
plot_10	WT05	fiorina	WT	85.5	Cs	0.00294231
plot_10	WT05	fiorina	WT	85.5	Ba	3.17195
plot_10	WT05	fiorina	WT	85.5	Ce	0.000455747
plot_12	WT06	claro	WT	13.5	Mg	1496.2
plot_12	WT06	claro	WT	13.5	P	4235.08
plot_12	WT06	claro	WT	13.5	K	4808.31
plot_12	WT06	claro	WT	13.5	Ca	41.3769
plot_12	WT06	claro	WT	13.5	Mn	48.1985
plot_12	WT06	claro	WT	13.5	Na	9.77285
plot_12	WT06	claro	WT	13.5	Al	1.89636
plot_12	WT06	claro	WT	13.5	V	0.00296542
plot_12	WT06	claro	WT	13.5	Cr	0.106134
plot_12	WT06	claro	WT	13.5	Fe	39.3442
plot_12	WT06	claro	WT	13.5	Ni	0.216547
plot_12	WT06	claro	WT	13.5	Cu	5.17185
plot_12	WT06	claro	WT	13.5	Zn	27.6717
plot_12	WT06	claro	WT	13.5	Ga	1.10333
plot_12	WT06	claro	WT	13.5	As	0.00658665
plot_12	WT06	claro	WT	13.5	Rb	2.52411
plot_12	WT06	claro	WT	13.5	Sr	1.6799
plot_12	WT06	claro	WT	13.5	Cd	0.0342764
plot_12	WT06	claro	WT	13.5	Cs	0.00204521
plot_12	WT06	claro	WT	13.5	Ba	3.71006
plot_12	WT06	claro	WT	13.5	Ce	0.000743639
plot_13	bx07	claro	bx1	22.5	Mg	1410.37
plot_13	bx07	claro	bx1	22.5	P	3982.66
plot_13	bx07	claro	bx1	22.5	K	4720.59
plot_13	bx07	claro	bx1	22.5	Ca	40.336
plot_13	bx07	claro	bx1	22.5	Mn	54.2227
plot_13	bx07	claro	bx1	22.5	Na	9.18692
plot_13	bx07	claro	bx1	22.5	Al	1.44917
plot_13	bx07	claro	bx1	22.5	V	0.00224479
plot_13	bx07	claro	bx1	22.5	Cr	0.0780887
plot_13	bx07	claro	bx1	22.5	Fe	40.6376
plot_13	bx07	claro	bx1	22.5	Ni	0.20759
plot_13	bx07	claro	bx1	22.5	Cu	5.26997
plot_13	bx07	claro	bx1	22.5	Zn	26.0802
plot_13	bx07	claro	bx1	22.5	Ga	1.06302
plot_13	bx07	claro	bx1	22.5	As	0.00607451
plot_13	bx07	claro	bx1	22.5	Rb	2.25644
plot_13	bx07	claro	bx1	22.5	Sr	1.68198
plot_13	bx07	claro	bx1	22.5	Cd	0.0301553
plot_13	bx07	claro	bx1	22.5	Cs	0.00189696
plot_13	bx07	claro	bx1	22.5	Ba	3.57185
plot_13	bx07	claro	bx1	22.5	Ce	0.000441662
plot_14	WT07	claro	WT	31.5	Mg	1573.04
plot_14	WT07	claro	WT	31.5	P	4472.11
plot_14	WT07	claro	WT	31.5	K	5380.44
plot_14	WT07	claro	WT	31.5	Ca	38.7411
plot_14	WT07	claro	WT	31.5	Mn	54.2898
plot_14	WT07	claro	WT	31.5	Na	10.8583
plot_14	WT07	claro	WT	31.5	Al	1.95347
plot_14	WT07	claro	WT	31.5	V	0.00294115
plot_14	WT07	claro	WT	31.5	Cr	0.0760931
plot_14	WT07	claro	WT	31.5	Fe	40.4069
plot_14	WT07	claro	WT	31.5	Ni	0.281785
plot_14	WT07	claro	WT	31.5	Cu	5.69819
plot_14	WT07	claro	WT	31.5	Zn	29.2324
plot_14	WT07	claro	WT	31.5	Ga	1.32432
plot_14	WT07	claro	WT	31.5	As	0.00660387
plot_14	WT07	claro	WT	31.5	Rb	1.57232
plot_14	WT07	claro	WT	31.5	Sr	2.11242
plot_14	WT07	claro	WT	31.5	Cd	0.0270926
plot_14	WT07	claro	WT	31.5	Cs	0.0017418
plot_14	WT07	claro	WT	31.5	Ba	4.36253
plot_14	WT07	claro	WT	31.5	Ce	0.000570162
plot_15	bx08	claro	bx1	40.5	Mg	1410.55
plot_15	bx08	claro	bx1	40.5	P	4064.72
plot_15	bx08	claro	bx1	40.5	K	4858.21
plot_15	bx08	claro	bx1	40.5	Ca	38.1261
plot_15	bx08	claro	bx1	40.5	Mn	43.6554
plot_15	bx08	claro	bx1	40.5	Na	9.71834
plot_15	bx08	claro	bx1	40.5	Al	1.37411
plot_15	bx08	claro	bx1	40.5	V	0.00145379
plot_15	bx08	claro	bx1	40.5	Cr	0.0690762
plot_15	bx08	claro	bx1	40.5	Fe	35.3471
plot_15	bx08	claro	bx1	40.5	Ni	0.240972
plot_15	bx08	claro	bx1	40.5	Cu	5.40325
plot_15	bx08	claro	bx1	40.5	Zn	24.4539
plot_15	bx08	claro	bx1	40.5	Ga	1.139
plot_15	bx08	claro	bx1	40.5	As	0.00691263
plot_15	bx08	claro	bx1	40.5	Rb	2.06188
plot_15	bx08	claro	bx1	40.5	Sr	1.93013
plot_15	bx08	claro	bx1	40.5	Cd	0.0288233
plot_15	bx08	claro	bx1	40.5	Cs	0.00206482
plot_15	bx08	claro	bx1	40.5	Ba	3.8657
plot_15	bx08	claro	bx1	40.5	Ce	0.000366235
plot_16	WT08	claro	WT	49.5	Mg	1486.26
plot_16	WT08	claro	WT	49.5	P	4099.58
plot_16	WT08	claro	WT	49.5	K	4725.75
plot_16	WT08	claro	WT	49.5	Ca	43.0502
plot_16	WT08	claro	WT	49.5	Mn	46.92
plot_16	WT08	claro	WT	49.5	Na	9.38985
plot_16	WT08	claro	WT	49.5	Al	1.3866
plot_16	WT08	claro	WT	49.5	V	0.00140616
plot_16	WT08	claro	WT	49.5	Cr	0.0707669
plot_16	WT08	claro	WT	49.5	Fe	37.4147
plot_16	WT08	claro	WT	49.5	Ni	0.229206
plot_16	WT08	claro	WT	49.5	Cu	5.49291
plot_16	WT08	claro	WT	49.5	Zn	25.2704
plot_16	WT08	claro	WT	49.5	Ga	1.09991
plot_16	WT08	claro	WT	49.5	As	0.00563389
plot_16	WT08	claro	WT	49.5	Rb	2.09911
plot_16	WT08	claro	WT	49.5	Sr	1.81291
plot_16	WT08	claro	WT	49.5	Cd	0.0321814
plot_16	WT08	claro	WT	49.5	Cs	0.00224132
plot_16	WT08	claro	WT	49.5	Ba	3.61945
plot_16	WT08	claro	WT	49.5	Ce	0.000361882
plot_17	bx09	claro	bx1	58.5	Mg	1319.42
plot_17	bx09	claro	bx1	58.5	P	3767.65
plot_17	bx09	claro	bx1	58.5	K	4444.41
plot_17	bx09	claro	bx1	58.5	Ca	42.5238
plot_17	bx09	claro	bx1	58.5	Mn	41.5565
plot_17	bx09	claro	bx1	58.5	Na	9.92076
plot_17	bx09	claro	bx1	58.5	Al	1.23181
plot_17	bx09	claro	bx1	58.5	V	0.00167921
plot_17	bx09	claro	bx1	58.5	Cr	0.0661669
plot_17	bx09	claro	bx1	58.5	Fe	33.1266
plot_17	bx09	claro	bx1	58.5	Ni	0.217738
plot_17	bx09	claro	bx1	58.5	Cu	4.94974
plot_17	bx09	claro	bx1	58.5	Zn	23.0092
plot_17	bx09	claro	bx1	58.5	Ga	0.997957
plot_17	bx09	claro	bx1	58.5	As	0.00575254
plot_17	bx09	claro	bx1	58.5	Rb	2.38058
plot_17	bx09	claro	bx1	58.5	Sr	1.86865
plot_17	bx09	claro	bx1	58.5	Cd	0.0294691
plot_17	bx09	claro	bx1	58.5	Cs	0.0023954
plot_17	bx09	claro	bx1	58.5	Ba	3.33218
plot_17	bx09	claro	bx1	58.5	Ce	0.000429612
plot_18	WT09	claro	WT	67.5	Mg	1407.12
plot_18	WT09	claro	WT	67.5	P	3922.31
plot_18	WT09	claro	WT	67.5	K	4608.93
plot_18	WT09	claro	WT	67.5	Ca	35.8925
plot_18	WT09	claro	WT	67.5	Mn	44.7492
plot_18	WT09	claro	WT	67.5	Na	10.3051
plot_18	WT09	claro	WT	67.5	Al	1.42064
plot_18	WT09	claro	WT	67.5	V	0.00189431
plot_18	WT09	claro	WT	67.5	Cr	0.0794134
plot_18	WT09	claro	WT	67.5	Fe	34.215
plot_18	WT09	claro	WT	67.5	Ni	0.212002
plot_18	WT09	claro	WT	67.5	Cu	5.87939
plot_18	WT09	claro	WT	67.5	Zn	26.0643
plot_18	WT09	claro	WT	67.5	Ga	0.977218
plot_18	WT09	claro	WT	67.5	As	0.00501429
plot_18	WT09	claro	WT	67.5	Rb	4.15096
plot_18	WT09	claro	WT	67.5	Sr	2.00542
plot_18	WT09	claro	WT	67.5	Cd	0.0311401
plot_18	WT09	claro	WT	67.5	Cs	0.00322437
plot_18	WT09	claro	WT	67.5	Ba	3.15766
plot_18	WT09	claro	WT	67.5	Ce	0.000610599
plot_19	bx10	claro	bx1	76.5	Mg	1330.64
plot_19	bx10	claro	bx1	76.5	P	3811.46
plot_19	bx10	claro	bx1	76.5	K	4577.3
plot_19	bx10	claro	bx1	76.5	Ca	41.6255
plot_19	bx10	claro	bx1	76.5	Mn	43.4812
plot_19	bx10	claro	bx1	76.5	Na	10.0764
plot_19	bx10	claro	bx1	76.5	Al	1.19307
plot_19	bx10	claro	bx1	76.5	V	0.00169687
plot_19	bx10	claro	bx1	76.5	Cr	0.0580628
plot_19	bx10	claro	bx1	76.5	Fe	31.6749
plot_19	bx10	claro	bx1	76.5	Ni	0.205806
plot_19	bx10	claro	bx1	76.5	Cu	5.79754
plot_19	bx10	claro	bx1	76.5	Zn	24.9795
plot_19	bx10	claro	bx1	76.5	Ga	0.961166
plot_19	bx10	claro	bx1	76.5	As	0.00468072
plot_19	bx10	claro	bx1	76.5	Rb	4.60828
plot_19	bx10	claro	bx1	76.5	Sr	1.53017
plot_19	bx10	claro	bx1	76.5	Cd	0.032475
plot_19	bx10	claro	bx1	76.5	Cs	0.0036949
plot_19	bx10	claro	bx1	76.5	Ba	2.9837
plot_19	bx10	claro	bx1	76.5	Ce	0.000324374
plot_20	WT10	claro	WT	85.5	Mg	1445.14
plot_20	WT10	claro	WT	85.5	P	4035.11
plot_20	WT10	claro	WT	85.5	K	4710.31
plot_20	WT10	claro	WT	85.5	Ca	39.9593
plot_20	WT10	claro	WT	85.5	Mn	42.8526
plot_20	WT10	claro	WT	85.5	Na	9.39834
plot_20	WT10	claro	WT	85.5	Al	1.18023
plot_20	WT10	claro	WT	85.5	V	0.00116655
plot_20	WT10	claro	WT	85.5	Cr	0.0550287
plot_20	WT10	claro	WT	85.5	Fe	36.04
plot_20	WT10	claro	WT	85.5	Ni	0.202249
plot_20	WT10	claro	WT	85.5	Cu	5.46509
plot_20	WT10	claro	WT	85.5	Zn	24.4593
plot_20	WT10	claro	WT	85.5	Ga	1.02245
plot_20	WT10	claro	WT	85.5	As	0.00550642
plot_20	WT10	claro	WT	85.5	Rb	2.77572
plot_20	WT10	claro	WT	85.5	Sr	1.52004
plot_20	WT10	claro	WT	85.5	Cd	0.03466
plot_20	WT10	claro	WT	85.5	Cs	0.00228322
plot_20	WT10	claro	WT	85.5	Ba	3.23487
plot_20	WT10	claro	WT	85.5	Ce	0.000247822
plot_21	bx11	fiorina	bx1	4.5	Mg	1324.89
plot_21	bx11	fiorina	bx1	4.5	P	3568.07
plot_21	bx11	fiorina	bx1	4.5	K	3610.3
plot_21	bx11	fiorina	bx1	4.5	Ca	47.8024
plot_21	bx11	fiorina	bx1	4.5	Mn	39.7909
plot_21	bx11	fiorina	bx1	4.5	Na	8.63497
plot_21	bx11	fiorina	bx1	4.5	Al	2.5241
plot_21	bx11	fiorina	bx1	4.5	V	0.00296654
plot_21	bx11	fiorina	bx1	4.5	Cr	0.127121
plot_21	bx11	fiorina	bx1	4.5	Fe	33.2959
plot_21	bx11	fiorina	bx1	4.5	Ni	0.183216
plot_21	bx11	fiorina	bx1	4.5	Cu	7.69533
plot_21	bx11	fiorina	bx1	4.5	Zn	27.5532
plot_21	bx11	fiorina	bx1	4.5	Ga	0.71871
plot_21	bx11	fiorina	bx1	4.5	As	0.00447836
plot_21	bx11	fiorina	bx1	4.5	Rb	3.19325
plot_21	bx11	fiorina	bx1	4.5	Sr	1.6858
plot_21	bx11	fiorina	bx1	4.5	Cd	0.0375942
plot_21	bx11	fiorina	bx1	4.5	Cs	0.0030803
plot_21	bx11	fiorina	bx1	4.5	Ba	2.24749
plot_21	bx11	fiorina	bx1	4.5	Ce	0.000821313
plot_22	WT11	fiorina	WT	13.5	Mg	1554.28
plot_22	WT11	fiorina	WT	13.5	P	4103.66
plot_22	WT11	fiorina	WT	13.5	K	4190.59
plot_22	WT11	fiorina	WT	13.5	Ca	50.1801
plot_22	WT11	fiorina	WT	13.5	Mn	40.0968
plot_22	WT11	fiorina	WT	13.5	Na	8.39138
plot_22	WT11	fiorina	WT	13.5	Al	1.67995
plot_22	WT11	fiorina	WT	13.5	V	0.0024593
plot_22	WT11	fiorina	WT	13.5	Cr	0.0768014
plot_22	WT11	fiorina	WT	13.5	Fe	35.2089
plot_22	WT11	fiorina	WT	13.5	Ni	0.113308
plot_22	WT11	fiorina	WT	13.5	Cu	8.06942
plot_22	WT11	fiorina	WT	13.5	Zn	24.3642
plot_22	WT11	fiorina	WT	13.5	Ga	1.0091
plot_22	WT11	fiorina	WT	13.5	As	0.00365307
plot_22	WT11	fiorina	WT	13.5	Rb	2.29555
plot_22	WT11	fiorina	WT	13.5	Sr	1.9659
plot_22	WT11	fiorina	WT	13.5	Cd	0.0341389
plot_22	WT11	fiorina	WT	13.5	Cs	0.00184636
plot_22	WT11	fiorina	WT	13.5	Ba	3.36676
plot_22	WT11	fiorina	WT	13.5	Ce	0.000712349
plot_23	bx12	fiorina	bx1	22.5	Mg	1638.35
plot_23	bx12	fiorina	bx1	22.5	P	4349.76
plot_23	bx12	fiorina	bx1	22.5	K	4469.36
plot_23	bx12	fiorina	bx1	22.5	Ca	46.0794
plot_23	bx12	fiorina	bx1	22.5	Mn	50.8584
plot_23	bx12	fiorina	bx1	22.5	Na	8.67064
plot_23	bx12	fiorina	bx1	22.5	Al	1.43518
plot_23	bx12	fiorina	bx1	22.5	V	0.00166585
plot_23	bx12	fiorina	bx1	22.5	Cr	0.129461
plot_23	bx12	fiorina	bx1	22.5	Fe	38.8768
plot_23	bx12	fiorina	bx1	22.5	Ni	0.117469
plot_23	bx12	fiorina	bx1	22.5	Cu	9.10135
plot_23	bx12	fiorina	bx1	22.5	Zn	27.6351
plot_23	bx12	fiorina	bx1	22.5	Ga	1.01263
plot_23	bx12	fiorina	bx1	22.5	As	0.00422548
plot_23	bx12	fiorina	bx1	22.5	Rb	2.07225
plot_23	bx12	fiorina	bx1	22.5	Sr	1.96322
plot_23	bx12	fiorina	bx1	22.5	Cd	0.0315738
plot_23	bx12	fiorina	bx1	22.5	Cs	0.00163262
plot_23	bx12	fiorina	bx1	22.5	Ba	3.32106
plot_23	bx12	fiorina	bx1	22.5	Ce	0.000312752
plot_24	WT12	fiorina	WT	31.5	Mg	1426.35
plot_24	WT12	fiorina	WT	31.5	P	3859.82
plot_24	WT12	fiorina	WT	31.5	K	4105.72
plot_24	WT12	fiorina	WT	31.5	Ca	52.6053
plot_24	WT12	fiorina	WT	31.5	Mn	41.2576
plot_24	WT12	fiorina	WT	31.5	Na	8.53128
plot_24	WT12	fiorina	WT	31.5	Al	1.11511
plot_24	WT12	fiorina	WT	31.5	V	0.00119313
plot_24	WT12	fiorina	WT	31.5	Cr	0.0555551
plot_24	WT12	fiorina	WT	31.5	Fe	33.5432
plot_24	WT12	fiorina	WT	31.5	Ni	0.124017
plot_24	WT12	fiorina	WT	31.5	Cu	8.19564
plot_24	WT12	fiorina	WT	31.5	Zn	24.4384
plot_24	WT12	fiorina	WT	31.5	Ga	1.11278
plot_24	WT12	fiorina	WT	31.5	As	0.00422033
plot_24	WT12	fiorina	WT	31.5	Rb	1.32532
plot_24	WT12	fiorina	WT	31.5	Sr	2.0029
plot_24	WT12	fiorina	WT	31.5	Cd	0.0289836
plot_24	WT12	fiorina	WT	31.5	Cs	0.0012297
plot_24	WT12	fiorina	WT	31.5	Ba	3.66569
plot_24	WT12	fiorina	WT	31.5	Ce	0.000363513
plot_25	bx13	fiorina	bx1	40.5	Mg	1653.22
plot_25	bx13	fiorina	bx1	40.5	P	4302.06
plot_25	bx13	fiorina	bx1	40.5	K	4510.39
plot_25	bx13	fiorina	bx1	40.5	Ca	52.1979
plot_25	bx13	fiorina	bx1	40.5	Mn	39.867
plot_25	bx13	fiorina	bx1	40.5	Na	8.61776
plot_25	bx13	fiorina	bx1	40.5	Al	2.09201
plot_25	bx13	fiorina	bx1	40.5	V	0.00243972
plot_25	bx13	fiorina	bx1	40.5	Cr	0.0645214
plot_25	bx13	fiorina	bx1	40.5	Fe	38.9672
plot_25	bx13	fiorina	bx1	40.5	Ni	0.136175
plot_25	bx13	fiorina	bx1	40.5	Cu	8.50585
plot_25	bx13	fiorina	bx1	40.5	Zn	24.8653
plot_25	bx13	fiorina	bx1	40.5	Ga	1.1204
plot_25	bx13	fiorina	bx1	40.5	As	0.00445262
plot_25	bx13	fiorina	bx1	40.5	Rb	1.68088
plot_25	bx13	fiorina	bx1	40.5	Sr	2.23892
plot_25	bx13	fiorina	bx1	40.5	Cd	0.0376523
plot_25	bx13	fiorina	bx1	40.5	Cs	0.00146853
plot_25	bx13	fiorina	bx1	40.5	Ba	3.77172
plot_25	bx13	fiorina	bx1	40.5	Ce	0.000269076
plot_26	WT13	fiorina	WT	49.5	Mg	1473.26
plot_26	WT13	fiorina	WT	49.5	P	3882.61
plot_26	WT13	fiorina	WT	49.5	K	4063
plot_26	WT13	fiorina	WT	49.5	Ca	50.1185
plot_26	WT13	fiorina	WT	49.5	Mn	30.9312
plot_26	WT13	fiorina	WT	49.5	Na	8.4591
plot_26	WT13	fiorina	WT	49.5	Al	1.4492
plot_26	WT13	fiorina	WT	49.5	V	0.00180814
plot_26	WT13	fiorina	WT	49.5	Cr	0.0607504
plot_26	WT13	fiorina	WT	49.5	Fe	33.37
plot_26	WT13	fiorina	WT	49.5	Ni	0.0996292
plot_26	WT13	fiorina	WT	49.5	Cu	8.05322
plot_26	WT13	fiorina	WT	49.5	Zn	21.679
plot_26	WT13	fiorina	WT	49.5	Ga	0.956045
plot_26	WT13	fiorina	WT	49.5	As	0.00429352
plot_26	WT13	fiorina	WT	49.5	Rb	1.31255
plot_26	WT13	fiorina	WT	49.5	Sr	2.09531
plot_26	WT13	fiorina	WT	49.5	Cd	0.0214446
plot_26	WT13	fiorina	WT	49.5	Cs	0.00110927
plot_26	WT13	fiorina	WT	49.5	Ba	2.99546
plot_26	WT13	fiorina	WT	49.5	Ce	0.000341429
plot_27	bx14	fiorina	bx1	58.5	Mg	1601.31
plot_27	bx14	fiorina	bx1	58.5	P	4392.61
plot_27	bx14	fiorina	bx1	58.5	K	4664.12
plot_27	bx14	fiorina	bx1	58.5	Ca	46.5973
plot_27	bx14	fiorina	bx1	58.5	Mn	37.6909
plot_27	bx14	fiorina	bx1	58.5	Na	9.32396
plot_27	bx14	fiorina	bx1	58.5	Al	NA
plot_27	bx14	fiorina	bx1	58.5	V	NA
plot_27	bx14	fiorina	bx1	58.5	Cr	NA
plot_27	bx14	fiorina	bx1	58.5	Fe	37.874
plot_27	bx14	fiorina	bx1	58.5	Ni	0.181234
plot_27	bx14	fiorina	bx1	58.5	Cu	7.85773
plot_27	bx14	fiorina	bx1	58.5	Zn	24.2703
plot_27	bx14	fiorina	bx1	58.5	Ga	0.862067
plot_27	bx14	fiorina	bx1	58.5	As	0.00396358
plot_27	bx14	fiorina	bx1	58.5	Rb	2.17807
plot_27	bx14	fiorina	bx1	58.5	Sr	2.11874
plot_27	bx14	fiorina	bx1	58.5	Cd	0.028625
plot_27	bx14	fiorina	bx1	58.5	Cs	0.00153383
plot_27	bx14	fiorina	bx1	58.5	Ba	2.77565
plot_27	bx14	fiorina	bx1	58.5	Ce	NA
plot_28	WT14	fiorina	WT	67.5	Mg	1473.47
plot_28	WT14	fiorina	WT	67.5	P	4027.38
plot_28	WT14	fiorina	WT	67.5	K	4428.51
plot_28	WT14	fiorina	WT	67.5	Ca	51.0279
plot_28	WT14	fiorina	WT	67.5	Mn	33.1167
plot_28	WT14	fiorina	WT	67.5	Na	8.06209
plot_28	WT14	fiorina	WT	67.5	Al	1.06469
plot_28	WT14	fiorina	WT	67.5	V	0.00183242
plot_28	WT14	fiorina	WT	67.5	Cr	0.0640337
plot_28	WT14	fiorina	WT	67.5	Fe	28.82
plot_28	WT14	fiorina	WT	67.5	Ni	0.0709672
plot_28	WT14	fiorina	WT	67.5	Cu	7.49742
plot_28	WT14	fiorina	WT	67.5	Zn	21.5569
plot_28	WT14	fiorina	WT	67.5	Ga	0.631417
plot_28	WT14	fiorina	WT	67.5	As	0.00353318
plot_28	WT14	fiorina	WT	67.5	Rb	2.79975
plot_28	WT14	fiorina	WT	67.5	Sr	2.00845
plot_28	WT14	fiorina	WT	67.5	Cd	0.0231573
plot_28	WT14	fiorina	WT	67.5	Cs	0.00150109
plot_28	WT14	fiorina	WT	67.5	Ba	2.11266
plot_28	WT14	fiorina	WT	67.5	Ce	0.000351286
plot_29	bx15	fiorina	bx1	76.5	Mg	1512.2
plot_29	bx15	fiorina	bx1	76.5	P	4185.38
plot_29	bx15	fiorina	bx1	76.5	K	4578.27
plot_29	bx15	fiorina	bx1	76.5	Ca	53.8905
plot_29	bx15	fiorina	bx1	76.5	Mn	35.7526
plot_29	bx15	fiorina	bx1	76.5	Na	8.68474
plot_29	bx15	fiorina	bx1	76.5	Al	1.28255
plot_29	bx15	fiorina	bx1	76.5	V	0.00132398
plot_29	bx15	fiorina	bx1	76.5	Cr	0.0607327
plot_29	bx15	fiorina	bx1	76.5	Fe	30.9087
plot_29	bx15	fiorina	bx1	76.5	Ni	0.0901078
plot_29	bx15	fiorina	bx1	76.5	Cu	8.27973
plot_29	bx15	fiorina	bx1	76.5	Zn	22.323
plot_29	bx15	fiorina	bx1	76.5	Ga	0.683602
plot_29	bx15	fiorina	bx1	76.5	As	0.00341113
plot_29	bx15	fiorina	bx1	76.5	Rb	4.49143
plot_29	bx15	fiorina	bx1	76.5	Sr	2.10897
plot_29	bx15	fiorina	bx1	76.5	Cd	0.0270006
plot_29	bx15	fiorina	bx1	76.5	Cs	0.0028119
plot_29	bx15	fiorina	bx1	76.5	Ba	2.30272
plot_29	bx15	fiorina	bx1	76.5	Ce	0.000337159
plot_30	WT15	fiorina	WT	85.5	Mg	1462.69
plot_30	WT15	fiorina	WT	85.5	P	3965.96
plot_30	WT15	fiorina	WT	85.5	K	4415.35
plot_30	WT15	fiorina	WT	85.5	Ca	61.5555
plot_30	WT15	fiorina	WT	85.5	Mn	40.6562
plot_30	WT15	fiorina	WT	85.5	Na	7.79752
plot_30	WT15	fiorina	WT	85.5	Al	1.28347
plot_30	WT15	fiorina	WT	85.5	V	0.00130507
plot_30	WT15	fiorina	WT	85.5	Cr	0.0533227
plot_30	WT15	fiorina	WT	85.5	Fe	28.7081
plot_30	WT15	fiorina	WT	85.5	Ni	0.11765
plot_30	WT15	fiorina	WT	85.5	Cu	7.42109
plot_30	WT15	fiorina	WT	85.5	Zn	22.8482
plot_30	WT15	fiorina	WT	85.5	Ga	0.894398
plot_30	WT15	fiorina	WT	85.5	As	0.00341839
plot_30	WT15	fiorina	WT	85.5	Rb	2.89728
plot_30	WT15	fiorina	WT	85.5	Sr	2.02063
plot_30	WT15	fiorina	WT	85.5	Cd	0.03075
plot_30	WT15	fiorina	WT	85.5	Cs	0.0015308
plot_30	WT15	fiorina	WT	85.5	Ba	2.97868
plot_30	WT15	fiorina	WT	85.5	Ce	0.000293363
plot_31	bx16	claro	bx1	4.5	Mg	1441.72
plot_31	bx16	claro	bx1	4.5	P	4113.09
plot_31	bx16	claro	bx1	4.5	K	4984.95
plot_31	bx16	claro	bx1	4.5	Ca	47.7331
plot_31	bx16	claro	bx1	4.5	Mn	51.5817
plot_31	bx16	claro	bx1	4.5	Na	9.32453
plot_31	bx16	claro	bx1	4.5	Al	2.32319
plot_31	bx16	claro	bx1	4.5	V	0.00199758
plot_31	bx16	claro	bx1	4.5	Cr	0.0569666
plot_31	bx16	claro	bx1	4.5	Fe	34.2885
plot_31	bx16	claro	bx1	4.5	Ni	0.238096
plot_31	bx16	claro	bx1	4.5	Cu	5.23178
plot_31	bx16	claro	bx1	4.5	Zn	27.8877
plot_31	bx16	claro	bx1	4.5	Ga	0.993377
plot_31	bx16	claro	bx1	4.5	As	0.00420586
plot_31	bx16	claro	bx1	4.5	Rb	3.86268
plot_31	bx16	claro	bx1	4.5	Sr	1.58595
plot_31	bx16	claro	bx1	4.5	Cd	0.0369235
plot_31	bx16	claro	bx1	4.5	Cs	0.00235473
plot_31	bx16	claro	bx1	4.5	Ba	3.30627
plot_31	bx16	claro	bx1	4.5	Ce	0.000482286
plot_32	WT16	claro	WT	13.5	Mg	1436.46
plot_32	WT16	claro	WT	13.5	P	4158.6
plot_32	WT16	claro	WT	13.5	K	4807.01
plot_32	WT16	claro	WT	13.5	Ca	46.9103
plot_32	WT16	claro	WT	13.5	Mn	40.6701
plot_32	WT16	claro	WT	13.5	Na	8.83066
plot_32	WT16	claro	WT	13.5	Al	1.93006
plot_32	WT16	claro	WT	13.5	V	0.00255564
plot_32	WT16	claro	WT	13.5	Cr	0.0842951
plot_32	WT16	claro	WT	13.5	Fe	34.4996
plot_32	WT16	claro	WT	13.5	Ni	0.146092
plot_32	WT16	claro	WT	13.5	Cu	4.65594
plot_32	WT16	claro	WT	13.5	Zn	21.3091
plot_32	WT16	claro	WT	13.5	Ga	0.911887
plot_32	WT16	claro	WT	13.5	As	0.00471675
plot_32	WT16	claro	WT	13.5	Rb	3.12217
plot_32	WT16	claro	WT	13.5	Sr	1.82247
plot_32	WT16	claro	WT	13.5	Cd	0.0267485
plot_32	WT16	claro	WT	13.5	Cs	0.00162007
plot_32	WT16	claro	WT	13.5	Ba	3.11242
plot_32	WT16	claro	WT	13.5	Ce	0.000550904
plot_33	bx17	claro	bx1	22.5	Mg	1730.5
plot_33	bx17	claro	bx1	22.5	P	4871.92
plot_33	bx17	claro	bx1	22.5	K	5754.94
plot_33	bx17	claro	bx1	22.5	Ca	45.2795
plot_33	bx17	claro	bx1	22.5	Mn	55.0831
plot_33	bx17	claro	bx1	22.5	Na	8.75441
plot_33	bx17	claro	bx1	22.5	Al	1.75956
plot_33	bx17	claro	bx1	22.5	V	0.00278165
plot_33	bx17	claro	bx1	22.5	Cr	0.0875408
plot_33	bx17	claro	bx1	22.5	Fe	42.1705
plot_33	bx17	claro	bx1	22.5	Ni	0.151975
plot_33	bx17	claro	bx1	22.5	Cu	5.1242
plot_33	bx17	claro	bx1	22.5	Zn	25.0514
plot_33	bx17	claro	bx1	22.5	Ga	0.91309
plot_33	bx17	claro	bx1	22.5	As	0.00516387
plot_33	bx17	claro	bx1	22.5	Rb	2.4209
plot_33	bx17	claro	bx1	22.5	Sr	2.08134
plot_33	bx17	claro	bx1	22.5	Cd	0.0260606
plot_33	bx17	claro	bx1	22.5	Cs	0.00114126
plot_33	bx17	claro	bx1	22.5	Ba	3.17148
plot_33	bx17	claro	bx1	22.5	Ce	0.000737865
plot_34	WT17	claro	WT	31.5	Mg	1496.1
plot_34	WT17	claro	WT	31.5	P	4310.59
plot_34	WT17	claro	WT	31.5	K	5053.93
plot_34	WT17	claro	WT	31.5	Ca	37.3663
plot_34	WT17	claro	WT	31.5	Mn	44.3402
plot_34	WT17	claro	WT	31.5	Na	8.32839
plot_34	WT17	claro	WT	31.5	Al	0.839626
plot_34	WT17	claro	WT	31.5	V	NA
plot_34	WT17	claro	WT	31.5	Cr	0.104036
plot_34	WT17	claro	WT	31.5	Fe	34.6919
plot_34	WT17	claro	WT	31.5	Ni	0.161051
plot_34	WT17	claro	WT	31.5	Cu	5.07754
plot_34	WT17	claro	WT	31.5	Zn	23.5286
plot_34	WT17	claro	WT	31.5	Ga	0.944468
plot_34	WT17	claro	WT	31.5	As	0.00481511
plot_34	WT17	claro	WT	31.5	Rb	1.54123
plot_34	WT17	claro	WT	31.5	Sr	1.93819
plot_34	WT17	claro	WT	31.5	Cd	NA
plot_34	WT17	claro	WT	31.5	Cs	NA
plot_34	WT17	claro	WT	31.5	Ba	NA
plot_34	WT17	claro	WT	31.5	Ce	NA
plot_35	bx18	claro	bx1	40.5	Mg	1330.52
plot_35	bx18	claro	bx1	40.5	P	3818.31
plot_35	bx18	claro	bx1	40.5	K	4682.58
plot_35	bx18	claro	bx1	40.5	Ca	34.8149
plot_35	bx18	claro	bx1	40.5	Mn	36.464
plot_35	bx18	claro	bx1	40.5	Na	8.02502
plot_35	bx18	claro	bx1	40.5	Al	1.11429
plot_35	bx18	claro	bx1	40.5	V	0.0016136
plot_35	bx18	claro	bx1	40.5	Cr	0.0561992
plot_35	bx18	claro	bx1	40.5	Fe	27.9231
plot_35	bx18	claro	bx1	40.5	Ni	0.149179
plot_35	bx18	claro	bx1	40.5	Cu	4.31076
plot_35	bx18	claro	bx1	40.5	Zn	19.1954
plot_35	bx18	claro	bx1	40.5	Ga	0.82548
plot_35	bx18	claro	bx1	40.5	As	0.00480797
plot_35	bx18	claro	bx1	40.5	Rb	1.32755
plot_35	bx18	claro	bx1	40.5	Sr	1.71279
plot_35	bx18	claro	bx1	40.5	Cd	0.021549
plot_35	bx18	claro	bx1	40.5	Cs	NA
plot_35	bx18	claro	bx1	40.5	Ba	2.7887
plot_35	bx18	claro	bx1	40.5	Ce	0.000364199
plot_36	WT18	claro	WT	49.5	Mg	1532.48
plot_36	WT18	claro	WT	49.5	P	4295.73
plot_36	WT18	claro	WT	49.5	K	5217.47
plot_36	WT18	claro	WT	49.5	Ca	36.1701
plot_36	WT18	claro	WT	49.5	Mn	40.203
plot_36	WT18	claro	WT	49.5	Na	8.94495
plot_36	WT18	claro	WT	49.5	Al	1.40499
plot_36	WT18	claro	WT	49.5	V	0.00221475
plot_36	WT18	claro	WT	49.5	Cr	0.0653594
plot_36	WT18	claro	WT	49.5	Fe	31.7303
plot_36	WT18	claro	WT	49.5	Ni	0.166186
plot_36	WT18	claro	WT	49.5	Cu	5.01586
plot_36	WT18	claro	WT	49.5	Zn	22.8625
plot_36	WT18	claro	WT	49.5	Ga	0.837898
plot_36	WT18	claro	WT	49.5	As	0.0040168
plot_36	WT18	claro	WT	49.5	Rb	1.37381
plot_36	WT18	claro	WT	49.5	Sr	1.80901
plot_36	WT18	claro	WT	49.5	Cd	0.0196401
plot_36	WT18	claro	WT	49.5	Cs	0.000739118
plot_36	WT18	claro	WT	49.5	Ba	2.78944
plot_36	WT18	claro	WT	49.5	Ce	0.000356709
plot_37	bx19	claro	bx1	58.5	Mg	1636.77
plot_37	bx19	claro	bx1	58.5	P	4713.79
plot_37	bx19	claro	bx1	58.5	K	5665.55
plot_37	bx19	claro	bx1	58.5	Ca	46.7321
plot_37	bx19	claro	bx1	58.5	Mn	47.7383
plot_37	bx19	claro	bx1	58.5	Na	8.70945
plot_37	bx19	claro	bx1	58.5	Al	1.3817
plot_37	bx19	claro	bx1	58.5	V	0.00184518
plot_37	bx19	claro	bx1	58.5	Cr	0.0826118
plot_37	bx19	claro	bx1	58.5	Fe	37.6046
plot_37	bx19	claro	bx1	58.5	Ni	0.173792
plot_37	bx19	claro	bx1	58.5	Cu	5.09434
plot_37	bx19	claro	bx1	58.5	Zn	24.3081
plot_37	bx19	claro	bx1	58.5	Ga	0.960276
plot_37	bx19	claro	bx1	58.5	As	0.00471493
plot_37	bx19	claro	bx1	58.5	Rb	2.14147
plot_37	bx19	claro	bx1	58.5	Sr	2.1582
plot_37	bx19	claro	bx1	58.5	Cd	0.0269027
plot_37	bx19	claro	bx1	58.5	Cs	0.00101813
plot_37	bx19	claro	bx1	58.5	Ba	3.32844
plot_37	bx19	claro	bx1	58.5	Ce	0.000477418
plot_38	WT19	claro	WT	67.5	Mg	1385.77
plot_38	WT19	claro	WT	67.5	P	4064.34
plot_38	WT19	claro	WT	67.5	K	4809.88
plot_38	WT19	claro	WT	67.5	Ca	40.3505
plot_38	WT19	claro	WT	67.5	Mn	38.4647
plot_38	WT19	claro	WT	67.5	Na	7.66525
plot_38	WT19	claro	WT	67.5	Al	0.980572
plot_38	WT19	claro	WT	67.5	V	0.00203273
plot_38	WT19	claro	WT	67.5	Cr	0.0492083
plot_38	WT19	claro	WT	67.5	Fe	30.0857
plot_38	WT19	claro	WT	67.5	Ni	0.0908266
plot_38	WT19	claro	WT	67.5	Cu	4.3117
plot_38	WT19	claro	WT	67.5	Zn	20.2576
plot_38	WT19	claro	WT	67.5	Ga	0.655698
plot_38	WT19	claro	WT	67.5	As	0.00332962
plot_38	WT19	claro	WT	67.5	Rb	1.87957
plot_38	WT19	claro	WT	67.5	Sr	2.00842
plot_38	WT19	claro	WT	67.5	Cd	0.0203622
plot_38	WT19	claro	WT	67.5	Cs	NA
plot_38	WT19	claro	WT	67.5	Ba	2.21698
plot_38	WT19	claro	WT	67.5	Ce	0.000373009
plot_39	bx20	claro	bx1	76.5	Mg	1569.71
plot_39	bx20	claro	bx1	76.5	P	4498.16
plot_39	bx20	claro	bx1	76.5	K	5542.59
plot_39	bx20	claro	bx1	76.5	Ca	45.6868
plot_39	bx20	claro	bx1	76.5	Mn	49.1271
plot_39	bx20	claro	bx1	76.5	Na	9.06373
plot_39	bx20	claro	bx1	76.5	Al	1.75697
plot_39	bx20	claro	bx1	76.5	V	0.00390621
plot_39	bx20	claro	bx1	76.5	Cr	0.114514
plot_39	bx20	claro	bx1	76.5	Fe	36.5944
plot_39	bx20	claro	bx1	76.5	Ni	0.13608
plot_39	bx20	claro	bx1	76.5	Cu	5.07367
plot_39	bx20	claro	bx1	76.5	Zn	25.6853
plot_39	bx20	claro	bx1	76.5	Ga	0.843019
plot_39	bx20	claro	bx1	76.5	As	0.00420677
plot_39	bx20	claro	bx1	76.5	Rb	2.89104
plot_39	bx20	claro	bx1	76.5	Sr	2.30404
plot_39	bx20	claro	bx1	76.5	Cd	0.0234766
plot_39	bx20	claro	bx1	76.5	Cs	0.00122314
plot_39	bx20	claro	bx1	76.5	Ba	2.88344
plot_39	bx20	claro	bx1	76.5	Ce	0.000669309
plot_40	WT20	claro	WT	85.5	Mg	1467.86
plot_40	WT20	claro	WT	85.5	P	4240.99
plot_40	WT20	claro	WT	85.5	K	5039.34
plot_40	WT20	claro	WT	85.5	Ca	41.8172
plot_40	WT20	claro	WT	85.5	Mn	40.556
plot_40	WT20	claro	WT	85.5	Na	8.64841
plot_40	WT20	claro	WT	85.5	Al	1.67038
plot_40	WT20	claro	WT	85.5	V	0.00239705
plot_40	WT20	claro	WT	85.5	Cr	0.0793803
plot_40	WT20	claro	WT	85.5	Fe	34.2475
plot_40	WT20	claro	WT	85.5	Ni	0.174217
plot_40	WT20	claro	WT	85.5	Cu	4.85811
plot_40	WT20	claro	WT	85.5	Zn	22.3589
plot_40	WT20	claro	WT	85.5	Ga	0.903022
plot_40	WT20	claro	WT	85.5	As	0.00397455
plot_40	WT20	claro	WT	85.5	Rb	2.69957
plot_40	WT20	claro	WT	85.5	Sr	1.72863
plot_40	WT20	claro	WT	85.5	Cd	0.0321131
plot_40	WT20	claro	WT	85.5	Cs	0.00132417
plot_40	WT20	claro	WT	85.5	Ba	3.09716
plot_40	WT20	claro	WT	85.5	Ce	0.000641112

## Sheet: Figure_6 - fig. sup. 1A-B
sample_nr	plot_id	sample_id	wheat_var	genotype	pos_y	nr_kernels_per_tiller	weight_kernels_per_tiller
Exp_9_01	plot_01	bx01_a	fiorina	bx1	4.5	36.8	1.6694
Exp_9_02	plot_01	bx01_b	fiorina	bx1	4.5	38	1.6598
Exp_9_03	plot_02	WT01_a	fiorina	WT	13.5	45.8	2.0806
Exp_9_04	plot_02	WT01_b	fiorina	WT	13.5	42.6	1.7982
Exp_9_05	plot_03	bx02_a	fiorina	bx1	22.5	36	1.7184
Exp_9_06	plot_03	bx02_b	fiorina	bx1	22.5	24.6	1.1532
Exp_9_07	plot_04	WT02_a	fiorina	WT	31.5	43.8	1.8962
Exp_9_08	plot_04	WT02_b	fiorina	WT	31.5	39.8	1.4906
Exp_9_09	plot_05	bx03_a	fiorina	bx1	40.5	37.8	1.781
Exp_9_10	plot_05	bx03_b	fiorina	bx1	40.5	37.8	1.657
Exp_9_11	plot_06	WT03_a	fiorina	WT	49.5	42.8	1.862
Exp_9_12	plot_06	WT03_b	fiorina	WT	49.5	39.6	1.5396
Exp_9_13	plot_07	bx04_a	fiorina	bx1	58.5	35.2	1.3704
Exp_9_14	plot_07	bx04_b	fiorina	bx1	58.5	44.6	1.7508
Exp_9_15	plot_08	WT04_a	fiorina	WT	67.5	36.4	1.5374
Exp_9_16	plot_08	WT04_b	fiorina	WT	67.5	39.8	1.5494
Exp_9_17	plot_09	bx05_a	fiorina	bx1	76.5	33.6	1.2954
Exp_9_18	plot_09	bx05_b	fiorina	bx1	76.5	36	1.2298
Exp_9_19	plot_10	WT05_a	fiorina	WT	85.5	44.8	1.8198
Exp_9_20	plot_10	WT05_b	fiorina	WT	85.5	39	1.5362
Exp_9_21	plot_11	bx06_a	claro	bx1	4.5	45.6	1.9856
Exp_9_22	plot_11	bx06_b	claro	bx1	4.5	49	2.229
Exp_9_23	plot_12	WT06_a	claro	WT	13.5	47.8	1.8838
Exp_9_24	plot_12	WT06_b	claro	WT	13.5	45.6	1.768
Exp_9_25	plot_13	bx07_a	claro	bx1	22.5	47	1.8694
Exp_9_26	plot_13	bx07_b	claro	bx1	22.5	45	1.8662
Exp_9_27	plot_14	WT07_a	claro	WT	31.5	50.8	2.135
Exp_9_28	plot_14	WT07_b	claro	WT	31.5	40.6	1.6656
Exp_9_29	plot_15	bx08_a	claro	bx1	40.5	47.8	1.974
Exp_9_30	plot_15	bx08_b	claro	bx1	40.5	47.2	1.8876
Exp_9_31	plot_16	WT08_a	claro	WT	49.5	36.6	1.4444
Exp_9_32	plot_16	WT08_b	claro	WT	49.5	42.8	1.6694
Exp_9_33	plot_17	bx09_a	claro	bx1	58.5	47.2	1.9234
Exp_9_34	plot_17	bx09_b	claro	bx1	58.5	48.2	2.0214
Exp_9_35	plot_18	WT09_a	claro	WT	67.5	48.4	2.0316
Exp_9_36	plot_18	WT09_b	claro	WT	67.5	52.2	1.987
Exp_9_37	plot_19	bx10_a	claro	bx1	76.5	50.8	2.0346
Exp_9_38	plot_19	bx10_b	claro	bx1	76.5	39.2	1.4428
Exp_9_39	plot_20	WT10_a	claro	WT	85.5	52.8	2.1516
Exp_9_40	plot_20	WT10_b	claro	WT	85.5	38.4	1.5196
Exp_9_41	plot_21	bx11_a	fiorina	bx1	4.5	40.4	1.7798
Exp_9_42	plot_21	bx11_b	fiorina	bx1	4.5	38.4	1.6578
Exp_9_43	plot_22	WT11_a	fiorina	WT	13.5	38.6	1.6266
Exp_9_44	plot_22	WT11_b	fiorina	WT	13.5	36.6	1.5078
Exp_9_45	plot_23	bx12_a	fiorina	bx1	22.5	42.2	1.8084
Exp_9_46	plot_23	bx12_b	fiorina	bx1	22.5	39.8	1.7056
Exp_9_47	plot_24	WT12_a	fiorina	WT	31.5	36.4	1.476
Exp_9_48	plot_24	WT12_b	fiorina	WT	31.5	46	1.9954
Exp_9_49	plot_25	bx13_a	fiorina	bx1	40.5	43	1.9274
Exp_9_50	plot_25	bx13_b	fiorina	bx1	40.5	39	1.6824
Exp_9_51	plot_26	WT13_a	fiorina	WT	49.5	41.4	1.8242
Exp_9_52	plot_26	WT13_b	fiorina	WT	49.5	33.2	1.2668
Exp_9_53	plot_27	bx14_a	fiorina	bx1	58.5	35	1.6368
Exp_9_54	plot_27	bx14_b	fiorina	bx1	58.5	37	1.6168
Exp_9_55	plot_28	WT14_a	fiorina	WT	67.5	39	1.634
Exp_9_56	plot_28	WT14_b	fiorina	WT	67.5	33.6	1.5152
Exp_9_57	plot_29	bx15_a	fiorina	bx1	76.5	41.4	1.628
Exp_9_58	plot_29	bx15_b	fiorina	bx1	76.5	34.6	1.4144
Exp_9_59	plot_30	WT15_a	fiorina	WT	85.5	38.8	1.355
Exp_9_60	plot_30	WT15_b	fiorina	WT	85.5	45.2	1.5804
Exp_9_61	plot_31	bx16_a	claro	bx1	4.5	47.2	2.0906
Exp_9_62	plot_31	bx16_b	claro	bx1	4.5	44.8	1.987
Exp_9_63	plot_32	WT16_a	claro	WT	13.5	47	1.8644
Exp_9_64	plot_32	WT16_b	claro	WT	13.5	44.8	2.0314
Exp_9_65	plot_33	bx17_a	claro	bx1	22.5	52.6	2.442
Exp_9_66	plot_33	bx17_b	claro	bx1	22.5	46.2	2.0772
Exp_9_67	plot_34	WT17_a	claro	WT	31.5	46.6	1.8568
Exp_9_68	plot_34	WT17_b	claro	WT	31.5	55.2	2.398
Exp_9_69	plot_35	bx18_a	claro	bx1	40.5	46	2.0536
Exp_9_70	plot_35	bx18_b	claro	bx1	40.5	39.6	1.7506
Exp_9_71	plot_36	WT18_a	claro	WT	49.5	44.4	1.9928
Exp_9_72	plot_36	WT18_b	claro	WT	49.5	40	1.8828
Exp_9_73	plot_37	bx19_a	claro	bx1	58.5	44	1.739
Exp_9_74	plot_37	bx19_b	claro	bx1	58.5	44.6	1.9312
Exp_9_75	plot_38	WT19_a	claro	WT	67.5	41.2	1.7812
Exp_9_76	plot_38	WT19_b	claro	WT	67.5	51.4	2.3006
Exp_9_77	plot_39	bx20_a	claro	bx1	76.5	47.6	1.8532
Exp_9_78	plot_39	bx20_b	claro	bx1	76.5	44	1.852
Exp_9_79	plot_40	WT20_a	claro	WT	85.5	43	1.703
Exp_9_80	plot_40	WT20_b	claro	WT	85.5	49.6	2.1672
Exp_9_81	plot_41	bx21_a	sailor	bx1	4.5	53.8	2.1136
Exp_9_82	plot_41	bx21_b	sailor	bx1	4.5	41.2	1.0692
Exp_9_83	plot_42	WT21_a	sailor	WT	13.5	45.4	1.6264
Exp_9_84	plot_42	WT21_b	sailor	WT	13.5	57.2	2.2108
Exp_9_85	plot_43	bx22_a	sailor	bx1	22.5	50.6	1.929
Exp_9_86	plot_43	bx22_b	sailor	bx1	22.5	53.6	1.978
Exp_9_87	plot_44	WT22_a	sailor	WT	31.5	44.2	1.3992
Exp_9_88	plot_44	WT22_b	sailor	WT	31.5	50	1.6768
Exp_9_89	plot_45	bx23_a	sailor	bx1	40.5	58.2	1.9936
Exp_9_90	plot_45	bx23_b	sailor	bx1	40.5	38.2	1.3718
Exp_9_91	plot_46	WT23_a	sailor	WT	49.5	48.8	1.8212
Exp_9_92	plot_46	WT23_b	sailor	WT	49.5	51.4	1.8616
Exp_9_93	plot_47	bx24_a	sailor	bx1	58.5	48.8	1.6788
Exp_9_94	plot_47	bx24_b	sailor	bx1	58.5	36	1.1796
Exp_9_95	plot_48	WT24_a	sailor	WT	67.5	48.6	1.3084
Exp_9_96	plot_48	WT24_b	sailor	WT	67.5	44.2	1.3996
Exp_9_97	plot_49	bx25_a	sailor	bx1	76.5	52.4	1.7746
Exp_9_98	plot_49	bx25_b	sailor	bx1	76.5	41.4	1.2084
Exp_9_99	plot_50	WT25_a	sailor	WT	85.5	50	1.4392
Exp_9_100	plot_50	WT25_b	sailor	WT	85.5	44.6	1.383
Exp_9_101	plot_51	bx26_a	sailor	bx1	4.5	48.4	2.12
Exp_9_102	plot_51	bx26_b	sailor	bx1	4.5	50.4	1.9394
Exp_9_103	plot_52	WT26_a	sailor	WT	13.5	47.6	1.8106
Exp_9_104	plot_52	WT26_b	sailor	WT	13.5	47.2	2.0056
Exp_9_105	plot_53	bx27_a	sailor	bx1	22.5	49.2	1.8652
Exp_9_106	plot_53	bx27_b	sailor	bx1	22.5	44.8	2.0794
Exp_9_107	plot_54	WT27_a	sailor	WT	31.5	49.6	1.7958
Exp_9_108	plot_54	WT27_b	sailor	WT	31.5	40.4	1.2552
Exp_9_109	plot_55	bx28_a	sailor	bx1	40.5	61	2.0346
Exp_9_110	plot_55	bx28_b	sailor	bx1	40.5	45.8	1.3766
Exp_9_111	plot_56	WT28_a	sailor	WT	49.5	57.6	2.1692
Exp_9_112	plot_56	WT28_b	sailor	WT	49.5	49.6	2.1132
Exp_9_113	plot_57	bx29_a	sailor	bx1	58.5	54.2	1.6648
Exp_9_114	plot_57	bx29_b	sailor	bx1	58.5	38.4	1.411
Exp_9_115	plot_58	WT29_a	sailor	WT	67.5	55.8	2.231
Exp_9_116	plot_58	WT29_b	sailor	WT	67.5	50.2	1.448
Exp_9_117	plot_59	bx30_a	sailor	bx1	76.5	60	1.6588
Exp_9_118	plot_59	bx30_b	sailor	bx1	76.5	55.8	1.836
Exp_9_119	plot_60	WT30_a	sailor	WT	85.5	51	1.9836
Exp_9_120	plot_60	WT30_b	sailor	WT	85.5	38	1.2182

## Sheet: Figure_6 - fig. sup. 1C-I
plot_id	wheat_var	conditioning	pos_y	sample_id	vol_weight	kernel_area	kernel_length	kernel_width	falling_number	water_absorption	dough_softening
plot_01	fiorina	bx1	4.5	bx01	85.4	17.3	6.7	3.6	380	66	NA
plot_02	fiorina	WT	13.5	WT01	82.6	17.1	6.7	3.5	371	66	150
plot_03	fiorina	bx1	22.5	bx02	82.3	17.3	6.7	3.5	353	64.5	65
plot_04	fiorina	WT	31.5	WT02	84.5	16.7	6.6	3.5	385	65.3	55
plot_05	fiorina	bx1	40.5	bx03	81.7	16.3	6.6	3.4	394	64.7	60
plot_06	fiorina	WT	49.5	WT03	84.1	16.8	6.7	3.5	423	65	70
plot_07	fiorina	bx1	58.5	bx04	81.9	15.8	6.5	3.4	410	65.5	65
plot_08	fiorina	WT	67.5	WT04	82.8	16.4	6.6	3.4	396	63.6	55
plot_09	fiorina	bx1	76.5	bx05	80.6	16.3	6.6	3.4	383	64.3	25
plot_10	fiorina	WT	85.5	WT05	81.4	16.5	6.6	3.4	376	65.4	60
plot_11	claro	bx1	4.5	bx06	79.2	15.8	6.3	3.5	370	65.8	95
plot_12	claro	WT	13.5	WT06	82.1	16.1	6.3	3.6	396	65.9	5
plot_13	claro	bx1	22.5	bx07	81	16	6.3	3.6	358	65.9	15
plot_14	claro	WT	31.5	WT07	81.3	15.8	6.3	3.5	363	66.4	85
plot_15	claro	bx1	40.5	bx08	81.4	15.8	6.3	3.5	374	65.5	40
plot_16	claro	WT	49.5	WT08	78.3	15.4	6.3	3.5	386	67.3	65
plot_17	claro	bx1	58.5	bx09	79.3	15.3	6.2	3.5	377	65.8	40
plot_18	claro	WT	67.5	WT09	79	15.4	6.3	3.5	400	66.8	55
plot_19	claro	bx1	76.5	bx10	81	15.5	6.3	3.5	389	67.4	60
plot_20	claro	WT	85.5	WT10	82.2	16.4	6.6	3.4	389	67.9	60
plot_21	fiorina	bx1	4.5	bx11	79.2	16.5	6.6	3.4	371	66.8	115
plot_22	fiorina	WT	13.5	WT11	82	16.7	6.6	3.5	389	67.3	70
plot_23	fiorina	bx1	22.5	bx12	80.2	17	6.7	3.5	384	66.4	70
plot_24	fiorina	WT	31.5	WT12	80.9	15.6	6.5	3.3	406	63.8	60
plot_25	fiorina	bx1	40.5	bx13	80.8	16.7	6.7	3.5	386	66.6	75
plot_26	fiorina	WT	49.5	WT13	81.9	16.2	6.6	3.4	356	65.2	70
plot_27	fiorina	bx1	58.5	bx14	79.5	15.4	6.5	3.3	392	64.3	100
plot_28	fiorina	WT	67.5	WT14	81	16	6.3	3.6	377	63.6	65
plot_29	fiorina	bx1	76.5	bx15	81.1	16.1	6.3	3.6	387	63.8	65
plot_30	fiorina	WT	85.5	WT15	79.8	16.2	6.3	3.6	369	65	50
plot_31	claro	bx1	4.5	bx16	81.5	16.4	6.3	3.6	395	64.6	45
plot_32	claro	WT	13.5	WT16	82.7	16.4	6.4	3.6	405	66.2	70
plot_33	claro	bx1	22.5	bx17	82.4	16.1	6.3	3.6	372	66.9	50
plot_34	claro	WT	31.5	WT17	82	15.5	6.2	3.5		65.5	30
plot_35	claro	bx1	40.5	bx18	80.8	15.6	6.3	3.5	376	64.7	20
plot_36	claro	WT	49.5	WT18	83.5	16.3	6.2	3.6	381	64.7	45
plot_37	claro	bx1	58.5	bx19	80.2	16.2	6.3	3.6	387	66.3	55
plot_38	claro	WT	67.5	WT19	79.9	16.2	6.3	3.6	383	67.4	125
plot_39	claro	bx1	76.5	bx20	82.3	16.3	6.3	3.6	391	66.2	40
plot_40	claro	WT	85.5	WT20	80.8	16.4	6.3	3.6	348	65.8	65

## Sheet: Figure_6 - fig. sup. 2
Same data as for Figure 6F
