# Supplementary material for: Plant secondary metabolite-dependent plant-soil feedbacks can improve crop yield in the field
Source: eLife. 2023 Aug 1;12:e84988. doi: 10.7554/eLife.84988 (PMC10393292; doi:10.7554/eLife.84988)
Supplement: Supplementary file 1. [file elife-84988-supp1.xlsx]

## Sheet: Sheet 1
Sample type	Library type	Sequencing Run	Number of sample	Purification method
Soil + Control	16S (Bacteria)	BE09	43	Beads
Rhizosphere	16S (Bacteria)	BE09	38	Agarose gel
Root	16S (Bacteria)	BE09	40	Agarose gel
Soil + Control	16S (Bacteria)	BE10	47	Beads
Rhizosphere	16S (Bacteria)	BE10	42	Agarose gel
Root	16S (Bacteria)	BE10	40	Agarose gel
Soil + Control	ITS (Fungi)	BE09	43	Beads
Rhizosphere	ITS (Fungi)	BE09	38	Beads
Root	ITS (Fungi)	BE09	40	Beads
Soil + Control	ITS (Fungi)	BE10	47	Beads
Rhizosphere	ITS (Fungi)	BE10	42	Beads
Root	ITS (Fungi)	BE10	40	Beads
