# Supplementary material for: Plant secondary metabolite-dependent plant-soil feedbacks can improve crop yield in the field
Source: eLife. 2023 Aug 1;12:e84988. doi: 10.7554/eLife.84988 (PMC10393292; doi:10.7554/eLife.84988)
Supplement: Supplementary file 2. [file elife-84988-supp2.xlsx]

## Sheet: barcode-to-sample assignments
sample_name	taxa	run_nbr	dual_bc	padding	f_bc_ID	f_bc_seq	f_primer_ID	f_primer_seq	r_bc_ID	r_bc_seq	r_primer_ID	r_primer_seq
maize_rhizosphere_m_bx02	b	runBE09	T	GGTAG	F72	ACACGAGA	799F	AACMGGATTAGATACCCKG	R49	CTGAACGT	1193R	ACGTCATCCCCACCTTCC
maize_rhizosphere_m_WT02	b	runBE09	T	GGTAG	F73	CTAGCAGT	799F	AACMGGATTAGATACCCKG	R43	TAGCTGAG	1193R	ACGTCATCCCCACCTTCC
maize_rhizosphere_m_bx05	b	runBE09	T	GGTAG	F72	ACACGAGA	799F	AACMGGATTAGATACCCKG	R42	GATACCTG	1193R	ACGTCATCCCCACCTTCC
maize_rhizosphere_m_WT05	b	runBE09	T	GGTAG	F70	GTAGCGTA	799F	AACMGGATTAGATACCCKG	R40	ACTGCACT	1193R	ACGTCATCCCCACCTTCC
maize_rhizosphere_m_bx06	b	runBE09	T	GGTAG	F62	GACTACGA	799F	AACMGGATTAGATACCCKG	R47	TCGCTATC	1193R	ACGTCATCCCCACCTTCC
maize_rhizosphere_m_WT06	b	runBE09	T	GGTAG	F66	GCATCCTA	799F	AACMGGATTAGATACCCKG	R48	ATGCGTCA	1193R	ACGTCATCCCCACCTTCC
maize_rhizosphere_m_bx08	b	runBE09	T	GGTAG	F69	CTATGCCT	799F	AACMGGATTAGATACCCKG	R40	ACTGCACT	1193R	ACGTCATCCCCACCTTCC
maize_rhizosphere_m_WT08	b	runBE09	T	GGTAG	F69	CTATGCCT	799F	AACMGGATTAGATACCCKG	R46	GCTACTCT	1193R	ACGTCATCCCCACCTTCC
maize_root_m_bx02	b	runBE09	T	GGTAG	F73	CTAGCAGT	799F	AACMGGATTAGATACCCKG	R40	ACTGCACT	1193R	ACGTCATCCCCACCTTCC
maize_root_m_WT02	b	runBE09	T	GGTAG	F70	GTAGCGTA	799F	AACMGGATTAGATACCCKG	R47	TCGCTATC	1193R	ACGTCATCCCCACCTTCC
maize_root_m_bx03	b	runBE09	T	GGTAG	F62	GACTACGA	799F	AACMGGATTAGATACCCKG	R49	CTGAACGT	1193R	ACGTCATCCCCACCTTCC
maize_root_m_WT03	b	runBE09	T	GGTAG	F64	AGCGTGTA	799F	AACMGGATTAGATACCCKG	R48	ATGCGTCA	1193R	ACGTCATCCCCACCTTCC
maize_root_m_bx05	b	runBE09	T	GGTAG	F69	CTATGCCT	799F	AACMGGATTAGATACCCKG	R45	CGTGTGAT	1193R	ACGTCATCCCCACCTTCC
maize_root_m_WT05	b	runBE09	T	GGTAG	F71	TGAGCTGT	799F	AACMGGATTAGATACCCKG	R40	ACTGCACT	1193R	ACGTCATCCCCACCTTCC
maize_root_m_bx08	b	runBE09	T	GGTAG	F75	TCGTCTGA	799F	AACMGGATTAGATACCCKG	R40	ACTGCACT	1193R	ACGTCATCCCCACCTTCC
maize_root_m_WT08	b	runBE09	T	GGTAG	F70	GTAGCGTA	799F	AACMGGATTAGATACCCKG	R44	AGTACACG	1193R	ACGTCATCCCCACCTTCC
maize_root_m_bx09	b	runBE09	T	GGTAG	F62	GACTACGA	799F	AACMGGATTAGATACCCKG	R48	ATGCGTCA	1193R	ACGTCATCCCCACCTTCC
maize_root_m_WT09	b	runBE09	T	GGTAG	F64	AGCGTGTA	799F	AACMGGATTAGATACCCKG	R49	CTGAACGT	1193R	ACGTCATCCCCACCTTCC
maize_soil_m_bx02	b	runBE09	T	GGTAG	F71	TGAGCTGT	799F	AACMGGATTAGATACCCKG	R47	TCGCTATC	1193R	ACGTCATCCCCACCTTCC
maize_soil_m_WT02	b	runBE09	T	GGTAG	F74	GCATAGTC	799F	AACMGGATTAGATACCCKG	R44	AGTACACG	1193R	ACGTCATCCCCACCTTCC
maize_soil_m_bx05	b	runBE09	T	GGTAG	F74	GCATAGTC	799F	AACMGGATTAGATACCCKG	R48	ATGCGTCA	1193R	ACGTCATCCCCACCTTCC
maize_soil_m_WT05	b	runBE09	T	GGTAG	F71	TGAGCTGT	799F	AACMGGATTAGATACCCKG	R41	CATGTGTG	1193R	ACGTCATCCCCACCTTCC
maize_soil_m_bx06	b	runBE09	T	GGTAG	F60	ACGCAGTA	799F	AACMGGATTAGATACCCKG	R50	GTCATCGT	1193R	ACGTCATCCCCACCTTCC
maize_soil_m_WT06	b	runBE09	T	GGTAG	F67	TCAGACAC	799F	AACMGGATTAGATACCCKG	R48	ATGCGTCA	1193R	ACGTCATCCCCACCTTCC
maize_soil_m_bx08	b	runBE09	T	GGTAG	F71	TGAGCTGT	799F	AACMGGATTAGATACCCKG	R43	TAGCTGAG	1193R	ACGTCATCCCCACCTTCC
maize_soil_m_WT08	b	runBE09	T	GGTAG	F73	CTAGCAGT	799F	AACMGGATTAGATACCCKG	R44	AGTACACG	1193R	ACGTCATCCCCACCTTCC
wheat_soil_bx02	b	runBE09	T	GGTAG	F74	GCATAGTC	799F	AACMGGATTAGATACCCKG	R43	TAGCTGAG	1193R	ACGTCATCCCCACCTTCC
wheat_soil_WT02	b	runBE09	T	GGTAG	F73	CTAGCAGT	799F	AACMGGATTAGATACCCKG	R45	CGTGTGAT	1193R	ACGTCATCCCCACCTTCC
wheat_soil_bx03	b	runBE09	T	GGTAG	F65	CGATCGAT	799F	AACMGGATTAGATACCCKG	R49	CTGAACGT	1193R	ACGTCATCCCCACCTTCC
wheat_soil_WT03	b	runBE09	T	GGTAG	F61	CAGTCACA	799F	AACMGGATTAGATACCCKG	R47	TCGCTATC	1193R	ACGTCATCCCCACCTTCC
wheat_soil_bx05	b	runBE09	T	GGTAG	F74	GCATAGTC	799F	AACMGGATTAGATACCCKG	R46	GCTACTCT	1193R	ACGTCATCCCCACCTTCC
wheat_soil_WT05	b	runBE09	T	GGTAG	F75	TCGTCTGA	799F	AACMGGATTAGATACCCKG	R47	TCGCTATC	1193R	ACGTCATCCCCACCTTCC
wheat_soil_bx08	b	runBE09	T	GGTAG	F73	CTAGCAGT	799F	AACMGGATTAGATACCCKG	R49	CTGAACGT	1193R	ACGTCATCCCCACCTTCC
wheat_soil_WT08	b	runBE09	T	GGTAG	F75	TCGTCTGA	799F	AACMGGATTAGATACCCKG	R41	CATGTGTG	1193R	ACGTCATCCCCACCTTCC
wheat_soil_bx09	b	runBE09	T	GGTAG	F66	GCATCCTA	799F	AACMGGATTAGATACCCKG	R49	CTGAACGT	1193R	ACGTCATCCCCACCTTCC
wheat_soil_WT09	b	runBE09	T	GGTAG	F66	GCATCCTA	799F	AACMGGATTAGATACCCKG	R46	GCTACTCT	1193R	ACGTCATCCCCACCTTCC
wheat_soil_bx11	b	runBE09	T	GGTAG	F71	TGAGCTGT	799F	AACMGGATTAGATACCCKG	R49	CTGAACGT	1193R	ACGTCATCCCCACCTTCC
wheat_soil_WT11	b	runBE09	T	GGTAG	F68	ATCGTCTC	799F	AACMGGATTAGATACCCKG	R49	CTGAACGT	1193R	ACGTCATCCCCACCTTCC
wheat_soil_bx14	b	runBE09	T	GGTAG	F75	TCGTCTGA	799F	AACMGGATTAGATACCCKG	R45	CGTGTGAT	1193R	ACGTCATCCCCACCTTCC
wheat_soil_WT14	b	runBE09	T	GGTAG	F72	ACACGAGA	799F	AACMGGATTAGATACCCKG	R44	AGTACACG	1193R	ACGTCATCCCCACCTTCC
wheat_soil_bx15	b	runBE09	T	GGTAG	F67	TCAGACAC	799F	AACMGGATTAGATACCCKG	R47	TCGCTATC	1193R	ACGTCATCCCCACCTTCC
wheat_soil_WT15	b	runBE09	T	GGTAG	F65	CGATCGAT	799F	AACMGGATTAGATACCCKG	R48	ATGCGTCA	1193R	ACGTCATCCCCACCTTCC
wheat_soil_bx17	b	runBE09	T	GGTAG	F69	CTATGCCT	799F	AACMGGATTAGATACCCKG	R49	CTGAACGT	1193R	ACGTCATCCCCACCTTCC
wheat_soil_WT17	b	runBE09	T	GGTAG	F68	ATCGTCTC	799F	AACMGGATTAGATACCCKG	R47	TCGCTATC	1193R	ACGTCATCCCCACCTTCC
wheat_soil_bx20	b	runBE09	T	GGTAG	F70	GTAGCGTA	799F	AACMGGATTAGATACCCKG	R48	ATGCGTCA	1193R	ACGTCATCCCCACCTTCC
wheat_soil_WT20	b	runBE09	T	GGTAG	F74	GCATAGTC	799F	AACMGGATTAGATACCCKG	R41	CATGTGTG	1193R	ACGTCATCCCCACCTTCC
wheat_soil_bx21	b	runBE09	T	GGTAG	F62	GACTACGA	799F	AACMGGATTAGATACCCKG	R46	GCTACTCT	1193R	ACGTCATCCCCACCTTCC
wheat_soil_WT21	b	runBE09	T	GGTAG	F60	ACGCAGTA	799F	AACMGGATTAGATACCCKG	R47	TCGCTATC	1193R	ACGTCATCCCCACCTTCC
wheat_soil_bx23	b	runBE09	T	GGTAG	F75	TCGTCTGA	799F	AACMGGATTAGATACCCKG	R42	GATACCTG	1193R	ACGTCATCCCCACCTTCC
wheat_soil_WT23	b	runBE09	T	GGTAG	F69	CTATGCCT	799F	AACMGGATTAGATACCCKG	R47	TCGCTATC	1193R	ACGTCATCCCCACCTTCC
wheat_soil_bx26	b	runBE09	T	GGTAG	F72	ACACGAGA	799F	AACMGGATTAGATACCCKG	R41	CATGTGTG	1193R	ACGTCATCCCCACCTTCC
wheat_soil_WT26	b	runBE09	T	GGTAG	F74	GCATAGTC	799F	AACMGGATTAGATACCCKG	R45	CGTGTGAT	1193R	ACGTCATCCCCACCTTCC
wheat_soil_bx27	b	runBE09	T	GGTAG	F63	TACTAGCG	799F	AACMGGATTAGATACCCKG	R50	GTCATCGT	1193R	ACGTCATCCCCACCTTCC
wheat_soil_WT27	b	runBE09	T	GGTAG	F64	AGCGTGTA	799F	AACMGGATTAGATACCCKG	R50	GTCATCGT	1193R	ACGTCATCCCCACCTTCC
wheat_soil_bx29	b	runBE09	T	GGTAG	F69	CTATGCCT	799F	AACMGGATTAGATACCCKG	R44	AGTACACG	1193R	ACGTCATCCCCACCTTCC
wheat_soil_WT29	b	runBE09	T	GGTAG	F70	GTAGCGTA	799F	AACMGGATTAGATACCCKG	R49	CTGAACGT	1193R	ACGTCATCCCCACCTTCC
wheat_rhizosphere_bx02	b	runBE09	T	GGTAG	F68	ATCGTCTC	799F	AACMGGATTAGATACCCKG	R46	GCTACTCT	1193R	ACGTCATCCCCACCTTCC
wheat_rhizosphere_WT02	b	runBE09	T	GGTAG	F75	TCGTCTGA	799F	AACMGGATTAGATACCCKG	R46	GCTACTCT	1193R	ACGTCATCCCCACCTTCC
wheat_rhizosphere_bx03	b	runBE09	T	GGTAG	F61	CAGTCACA	799F	AACMGGATTAGATACCCKG	R46	GCTACTCT	1193R	ACGTCATCCCCACCTTCC
wheat_rhizosphere_WT03	b	runBE09	T	GGTAG	F60	ACGCAGTA	799F	AACMGGATTAGATACCCKG	R48	ATGCGTCA	1193R	ACGTCATCCCCACCTTCC
wheat_rhizosphere_bx05	b	runBE09	T	GGTAG	F75	TCGTCTGA	799F	AACMGGATTAGATACCCKG	R48	ATGCGTCA	1193R	ACGTCATCCCCACCTTCC
wheat_rhizosphere_WT05	b	runBE09	T	GGTAG	F69	CTATGCCT	799F	AACMGGATTAGATACCCKG	R41	CATGTGTG	1193R	ACGTCATCCCCACCTTCC
wheat_rhizosphere_bx08	b	runBE09	T	GGTAG	F71	TGAGCTGT	799F	AACMGGATTAGATACCCKG	R45	CGTGTGAT	1193R	ACGTCATCCCCACCTTCC
wheat_rhizosphere_WT08	b	runBE09	T	GGTAG	F74	GCATAGTC	799F	AACMGGATTAGATACCCKG	R49	CTGAACGT	1193R	ACGTCATCCCCACCTTCC
wheat_rhizosphere_bx09	b	runBE09	T	GGTAG	F66	GCATCCTA	799F	AACMGGATTAGATACCCKG	R47	TCGCTATC	1193R	ACGTCATCCCCACCTTCC
wheat_rhizosphere_WT09	b	runBE09	T	GGTAG	F60	ACGCAGTA	799F	AACMGGATTAGATACCCKG	R46	GCTACTCT	1193R	ACGTCATCCCCACCTTCC
wheat_rhizosphere_bx11	b	runBE09	T	GGTAG	F75	TCGTCTGA	799F	AACMGGATTAGATACCCKG	R49	CTGAACGT	1193R	ACGTCATCCCCACCTTCC
wheat_rhizosphere_WT11	b	runBE09	T	GGTAG	F73	CTAGCAGT	799F	AACMGGATTAGATACCCKG	R46	GCTACTCT	1193R	ACGTCATCCCCACCTTCC
wheat_rhizosphere_bx14	b	runBE09	T	GGTAG	F75	TCGTCTGA	799F	AACMGGATTAGATACCCKG	R43	TAGCTGAG	1193R	ACGTCATCCCCACCTTCC
wheat_rhizosphere_WT14	b	runBE09	T	GGTAG	F70	GTAGCGTA	799F	AACMGGATTAGATACCCKG	R42	GATACCTG	1193R	ACGTCATCCCCACCTTCC
wheat_rhizosphere_bx15	b	runBE09	T	GGTAG	F63	TACTAGCG	799F	AACMGGATTAGATACCCKG	R47	TCGCTATC	1193R	ACGTCATCCCCACCTTCC
wheat_rhizosphere_WT15	b	runBE09	T	GGTAG	F63	TACTAGCG	799F	AACMGGATTAGATACCCKG	R49	CTGAACGT	1193R	ACGTCATCCCCACCTTCC
wheat_rhizosphere_bx17	b	runBE09	T	GGTAG	F72	ACACGAGA	799F	AACMGGATTAGATACCCKG	R40	ACTGCACT	1193R	ACGTCATCCCCACCTTCC
wheat_rhizosphere_WT17	b	runBE09	T	GGTAG	F68	ATCGTCTC	799F	AACMGGATTAGATACCCKG	R41	CATGTGTG	1193R	ACGTCATCCCCACCTTCC
wheat_rhizosphere_bx20	b	runBE09	T	GGTAG	F72	ACACGAGA	799F	AACMGGATTAGATACCCKG	R48	ATGCGTCA	1193R	ACGTCATCCCCACCTTCC
wheat_rhizosphere_WT20	b	runBE09	T	GGTAG	F75	TCGTCTGA	799F	AACMGGATTAGATACCCKG	R44	AGTACACG	1193R	ACGTCATCCCCACCTTCC
wheat_rhizosphere_bx21	b	runBE09	T	GGTAG	F61	CAGTCACA	799F	AACMGGATTAGATACCCKG	R50	GTCATCGT	1193R	ACGTCATCCCCACCTTCC
wheat_rhizosphere_WT21	b	runBE09	T	GGTAG	F63	TACTAGCG	799F	AACMGGATTAGATACCCKG	R48	ATGCGTCA	1193R	ACGTCATCCCCACCTTCC
wheat_rhizosphere_bx23	b	runBE09	T	GGTAG	F72	ACACGAGA	799F	AACMGGATTAGATACCCKG	R47	TCGCTATC	1193R	ACGTCATCCCCACCTTCC
wheat_rhizosphere_WT23	b	runBE09	T	GGTAG	F71	TGAGCTGT	799F	AACMGGATTAGATACCCKG	R44	AGTACACG	1193R	ACGTCATCCCCACCTTCC
wheat_rhizosphere_bx26	b	runBE09	T	GGTAG	F74	GCATAGTC	799F	AACMGGATTAGATACCCKG	R42	GATACCTG	1193R	ACGTCATCCCCACCTTCC
wheat_rhizosphere_WT26	b	runBE09	T	GGTAG	F71	TGAGCTGT	799F	AACMGGATTAGATACCCKG	R46	GCTACTCT	1193R	ACGTCATCCCCACCTTCC
wheat_rhizosphere_bx27	b	runBE09	T	GGTAG	F66	GCATCCTA	799F	AACMGGATTAGATACCCKG	R50	GTCATCGT	1193R	ACGTCATCCCCACCTTCC
wheat_rhizosphere_WT27	b	runBE09	T	GGTAG	F62	GACTACGA	799F	AACMGGATTAGATACCCKG	R50	GTCATCGT	1193R	ACGTCATCCCCACCTTCC
wheat_rhizosphere_bx29	b	runBE09	T	GGTAG	F74	GCATAGTC	799F	AACMGGATTAGATACCCKG	R40	ACTGCACT	1193R	ACGTCATCCCCACCTTCC
wheat_rhizosphere_WT29	b	runBE09	T	GGTAG	F69	CTATGCCT	799F	AACMGGATTAGATACCCKG	R48	ATGCGTCA	1193R	ACGTCATCCCCACCTTCC
wheat_root_bx02	b	runBE09	T	GGTAG	F68	ATCGTCTC	799F	AACMGGATTAGATACCCKG	R48	ATGCGTCA	1193R	ACGTCATCCCCACCTTCC
wheat_root_WT02	b	runBE09	T	GGTAG	F72	ACACGAGA	799F	AACMGGATTAGATACCCKG	R46	GCTACTCT	1193R	ACGTCATCCCCACCTTCC
wheat_root_bx03	b	runBE09	T	GGTAG	F63	TACTAGCG	799F	AACMGGATTAGATACCCKG	R46	GCTACTCT	1193R	ACGTCATCCCCACCTTCC
wheat_root_WT03	b	runBE09	T	GGTAG	F64	AGCGTGTA	799F	AACMGGATTAGATACCCKG	R47	TCGCTATC	1193R	ACGTCATCCCCACCTTCC
wheat_root_bx05	b	runBE09	T	GGTAG	F69	CTATGCCT	799F	AACMGGATTAGATACCCKG	R43	TAGCTGAG	1193R	ACGTCATCCCCACCTTCC
wheat_root_WT05	b	runBE09	T	GGTAG	F73	CTAGCAGT	799F	AACMGGATTAGATACCCKG	R42	GATACCTG	1193R	ACGTCATCCCCACCTTCC
wheat_root_bx08	b	runBE09	T	GGTAG	F70	GTAGCGTA	799F	AACMGGATTAGATACCCKG	R46	GCTACTCT	1193R	ACGTCATCCCCACCTTCC
wheat_root_WT08	b	runBE09	T	GGTAG	F73	CTAGCAGT	799F	AACMGGATTAGATACCCKG	R47	TCGCTATC	1193R	ACGTCATCCCCACCTTCC
wheat_root_bx09	b	runBE09	T	GGTAG	F67	TCAGACAC	799F	AACMGGATTAGATACCCKG	R49	CTGAACGT	1193R	ACGTCATCCCCACCTTCC
wheat_root_WT09	b	runBE09	T	GGTAG	F67	TCAGACAC	799F	AACMGGATTAGATACCCKG	R46	GCTACTCT	1193R	ACGTCATCCCCACCTTCC
wheat_root_bx11	b	runBE09	T	GGTAG	F70	GTAGCGTA	799F	AACMGGATTAGATACCCKG	R45	CGTGTGAT	1193R	ACGTCATCCCCACCTTCC
wheat_root_WT11	b	runBE09	T	GGTAG	F74	GCATAGTC	799F	AACMGGATTAGATACCCKG	R47	TCGCTATC	1193R	ACGTCATCCCCACCTTCC
wheat_root_bx14	b	runBE09	T	GGTAG	F73	CTAGCAGT	799F	AACMGGATTAGATACCCKG	R41	CATGTGTG	1193R	ACGTCATCCCCACCTTCC
wheat_root_WT14	b	runBE09	T	GGTAG	F71	TGAGCTGT	799F	AACMGGATTAGATACCCKG	R42	GATACCTG	1193R	ACGTCATCCCCACCTTCC
wheat_root_bx15	b	runBE09	T	GGTAG	F65	CGATCGAT	799F	AACMGGATTAGATACCCKG	R46	GCTACTCT	1193R	ACGTCATCCCCACCTTCC
wheat_root_WT15	b	runBE09	T	GGTAG	F65	CGATCGAT	799F	AACMGGATTAGATACCCKG	R47	TCGCTATC	1193R	ACGTCATCCCCACCTTCC
wheat_root_bx17	b	runBE09	T	GGTAG	F72	ACACGAGA	799F	AACMGGATTAGATACCCKG	R43	TAGCTGAG	1193R	ACGTCATCCCCACCTTCC
wheat_root_WT17	b	runBE09	T	GGTAG	F70	GTAGCGTA	799F	AACMGGATTAGATACCCKG	R43	TAGCTGAG	1193R	ACGTCATCCCCACCTTCC
wheat_root_bx20	b	runBE09	T	GGTAG	F71	TGAGCTGT	799F	AACMGGATTAGATACCCKG	R48	ATGCGTCA	1193R	ACGTCATCCCCACCTTCC
wheat_root_WT20	b	runBE09	T	GGTAG	F70	GTAGCGTA	799F	AACMGGATTAGATACCCKG	R41	CATGTGTG	1193R	ACGTCATCCCCACCTTCC
wheat_root_bx21	b	runBE09	T	GGTAG	F64	AGCGTGTA	799F	AACMGGATTAGATACCCKG	R46	GCTACTCT	1193R	ACGTCATCCCCACCTTCC
wheat_root_WT21	b	runBE09	T	GGTAG	F60	ACGCAGTA	799F	AACMGGATTAGATACCCKG	R49	CTGAACGT	1193R	ACGTCATCCCCACCTTCC
wheat_root_bx23	b	runBE09	T	GGTAG	F73	CTAGCAGT	799F	AACMGGATTAGATACCCKG	R48	ATGCGTCA	1193R	ACGTCATCCCCACCTTCC
wheat_root_WT23	b	runBE09	T	GGTAG	F68	ATCGTCTC	799F	AACMGGATTAGATACCCKG	R43	TAGCTGAG	1193R	ACGTCATCCCCACCTTCC
wheat_root_bx26	b	runBE09	T	GGTAG	F68	ATCGTCTC	799F	AACMGGATTAGATACCCKG	R44	AGTACACG	1193R	ACGTCATCCCCACCTTCC
wheat_root_WT26	b	runBE09	T	GGTAG	F68	ATCGTCTC	799F	AACMGGATTAGATACCCKG	R42	GATACCTG	1193R	ACGTCATCCCCACCTTCC
wheat_root_bx27	b	runBE09	T	GGTAG	F61	CAGTCACA	799F	AACMGGATTAGATACCCKG	R49	CTGAACGT	1193R	ACGTCATCCCCACCTTCC
wheat_root_WT27	b	runBE09	T	GGTAG	F65	CGATCGAT	799F	AACMGGATTAGATACCCKG	R50	GTCATCGT	1193R	ACGTCATCCCCACCTTCC
wheat_root_bx29	b	runBE09	T	GGTAG	F68	ATCGTCTC	799F	AACMGGATTAGATACCCKG	R45	CGTGTGAT	1193R	ACGTCATCCCCACCTTCC
wheat_root_WT29	b	runBE09	T	GGTAG	F68	ATCGTCTC	799F	AACMGGATTAGATACCCKG	R40	ACTGCACT	1193R	ACGTCATCCCCACCTTCC
Empty_extraction	b	runBE09	T	GGTAG	F72	ACACGAGA	799F	AACMGGATTAGATACCCKG	R45	CGTGTGAT	1193R	ACGTCATCCCCACCTTCC
Empty_extraction	b	runBE09	T	GGTAG	F69	CTATGCCT	799F	AACMGGATTAGATACCCKG	R42	GATACCTG	1193R	ACGTCATCCCCACCTTCC
Empty_extraction	b	runBE09	T	GGTAG	F61	CAGTCACA	799F	AACMGGATTAGATACCCKG	R48	ATGCGTCA	1193R	ACGTCATCCCCACCTTCC
PCR_empty_control	b	runBE09	T	GGTAG	F68	ATCGTCTC	799F	AACMGGATTAGATACCCKG	R50	GTCATCGT	1193R	ACGTCATCCCCACCTTCC
PCR_empty_control	b	runBE09	T	GGTAG	F67	TCAGACAC	799F	AACMGGATTAGATACCCKG	R50	GTCATCGT	1193R	ACGTCATCCCCACCTTCC
maize_rhizosphere_m_bx02	f	runBE09	T	GGTAG	F13	AGTTGTGC	ITS1F	CTTGGTCATTTAGAGGAAGTAA	R10	CATGAGCA	ITS2	GCTGCGTTCTTCATCGATGC
maize_rhizosphere_m_WT02	f	runBE09	T	GGTAG	F14	ACAGGCAT	ITS1F	CTTGGTCATTTAGAGGAAGTAA	R4	GGTACTTC	ITS2	GCTGCGTTCTTCATCGATGC
maize_rhizosphere_m_bx05	f	runBE09	T	GGTAG	F13	AGTTGTGC	ITS1F	CTTGGTCATTTAGAGGAAGTAA	R3	GTGATCCA	ITS2	GCTGCGTTCTTCATCGATGC
maize_rhizosphere_m_WT05	f	runBE09	T	GGTAG	F11	TTCGGCTA	ITS1F	CTTGGTCATTTAGAGGAAGTAA	R1	TCTTCGAC	ITS2	GCTGCGTTCTTCATCGATGC
maize_rhizosphere_m_bx06	f	runBE09	T	GGTAG	F3	GCCAATAC	ITS1F	CTTGGTCATTTAGAGGAAGTAA	R8	CGTCTTCA	ITS2	GCTGCGTTCTTCATCGATGC
maize_rhizosphere_m_WT06	f	runBE09	T	GGTAG	F7	AAGACGAG	ITS1F	CTTGGTCATTTAGAGGAAGTAA	R9	CCTTGGAA	ITS2	GCTGCGTTCTTCATCGATGC
maize_rhizosphere_m_bx08	f	runBE09	T	GGTAG	F10	TCGATGAC	ITS1F	CTTGGTCATTTAGAGGAAGTAA	R1	TCTTCGAC	ITS2	GCTGCGTTCTTCATCGATGC
maize_rhizosphere_m_WT08	f	runBE09	T	GGTAG	F10	TCGATGAC	ITS1F	CTTGGTCATTTAGAGGAAGTAA	R7	CTGTATGC	ITS2	GCTGCGTTCTTCATCGATGC
maize_root_m_bx02	f	runBE09	T	GGTAG	F14	ACAGGCAT	ITS1F	CTTGGTCATTTAGAGGAAGTAA	R1	TCTTCGAC	ITS2	GCTGCGTTCTTCATCGATGC
maize_root_m_WT02	f	runBE09	T	GGTAG	F11	TTCGGCTA	ITS1F	CTTGGTCATTTAGAGGAAGTAA	R8	CGTCTTCA	ITS2	GCTGCGTTCTTCATCGATGC
maize_root_m_bx03	f	runBE09	T	GGTAG	F3	GCCAATAC	ITS1F	CTTGGTCATTTAGAGGAAGTAA	R10	CATGAGCA	ITS2	GCTGCGTTCTTCATCGATGC
maize_root_m_WT03	f	runBE09	T	GGTAG	F5	AACAACCG	ITS1F	CTTGGTCATTTAGAGGAAGTAA	R9	CCTTGGAA	ITS2	GCTGCGTTCTTCATCGATGC
maize_root_m_bx05	f	runBE09	T	GGTAG	F10	TCGATGAC	ITS1F	CTTGGTCATTTAGAGGAAGTAA	R6	GATCTCAG	ITS2	GCTGCGTTCTTCATCGATGC
maize_root_m_WT05	f	runBE09	T	GGTAG	F12	TGTCACAC	ITS1F	CTTGGTCATTTAGAGGAAGTAA	R1	TCTTCGAC	ITS2	GCTGCGTTCTTCATCGATGC
maize_root_m_bx08	f	runBE09	T	GGTAG	F16	ATCCTTCC	ITS1F	CTTGGTCATTTAGAGGAAGTAA	R1	TCTTCGAC	ITS2	GCTGCGTTCTTCATCGATGC
maize_root_m_WT08	f	runBE09	T	GGTAG	F11	TTCGGCTA	ITS1F	CTTGGTCATTTAGAGGAAGTAA	R5	GCTTCACA	ITS2	GCTGCGTTCTTCATCGATGC
maize_root_m_bx09	f	runBE09	T	GGTAG	F3	GCCAATAC	ITS1F	CTTGGTCATTTAGAGGAAGTAA	R9	CCTTGGAA	ITS2	GCTGCGTTCTTCATCGATGC
maize_root_m_WT09	f	runBE09	T	GGTAG	F5	AACAACCG	ITS1F	CTTGGTCATTTAGAGGAAGTAA	R10	CATGAGCA	ITS2	GCTGCGTTCTTCATCGATGC
maize_soil_m_bx02	f	runBE09	T	GGTAG	F12	TGTCACAC	ITS1F	CTTGGTCATTTAGAGGAAGTAA	R8	CGTCTTCA	ITS2	GCTGCGTTCTTCATCGATGC
maize_soil_m_WT02	f	runBE09	T	GGTAG	F15	AGAACCAG	ITS1F	CTTGGTCATTTAGAGGAAGTAA	R5	GCTTCACA	ITS2	GCTGCGTTCTTCATCGATGC
maize_soil_m_bx05	f	runBE09	T	GGTAG	F15	AGAACCAG	ITS1F	CTTGGTCATTTAGAGGAAGTAA	R9	CCTTGGAA	ITS2	GCTGCGTTCTTCATCGATGC
maize_soil_m_WT05	f	runBE09	T	GGTAG	F12	TGTCACAC	ITS1F	CTTGGTCATTTAGAGGAAGTAA	R2	TATGCGGT	ITS2	GCTGCGTTCTTCATCGATGC
maize_soil_m_bx06	f	runBE09	T	GGTAG	F1	ACAACAGC	ITS1F	CTTGGTCATTTAGAGGAAGTAA	R11	TTCCAGGT	ITS2	GCTGCGTTCTTCATCGATGC
maize_soil_m_WT06	f	runBE09	T	GGTAG	F8	CCTACCTA	ITS1F	CTTGGTCATTTAGAGGAAGTAA	R9	CCTTGGAA	ITS2	GCTGCGTTCTTCATCGATGC
maize_soil_m_bx08	f	runBE09	T	GGTAG	F12	TGTCACAC	ITS1F	CTTGGTCATTTAGAGGAAGTAA	R4	GGTACTTC	ITS2	GCTGCGTTCTTCATCGATGC
maize_soil_m_WT08	f	runBE09	T	GGTAG	F14	ACAGGCAT	ITS1F	CTTGGTCATTTAGAGGAAGTAA	R5	GCTTCACA	ITS2	GCTGCGTTCTTCATCGATGC
wheat_soil_bx02	f	runBE09	T	GGTAG	F15	AGAACCAG	ITS1F	CTTGGTCATTTAGAGGAAGTAA	R4	GGTACTTC	ITS2	GCTGCGTTCTTCATCGATGC
wheat_soil_WT02	f	runBE09	T	GGTAG	F14	ACAGGCAT	ITS1F	CTTGGTCATTTAGAGGAAGTAA	R6	GATCTCAG	ITS2	GCTGCGTTCTTCATCGATGC
wheat_soil_bx03	f	runBE09	T	GGTAG	F6	CCACATTG	ITS1F	CTTGGTCATTTAGAGGAAGTAA	R10	CATGAGCA	ITS2	GCTGCGTTCTTCATCGATGC
wheat_soil_WT03	f	runBE09	T	GGTAG	F2	CAACACAG	ITS1F	CTTGGTCATTTAGAGGAAGTAA	R8	CGTCTTCA	ITS2	GCTGCGTTCTTCATCGATGC
wheat_soil_bx05	f	runBE09	T	GGTAG	F15	AGAACCAG	ITS1F	CTTGGTCATTTAGAGGAAGTAA	R7	CTGTATGC	ITS2	GCTGCGTTCTTCATCGATGC
wheat_soil_WT05	f	runBE09	T	GGTAG	F16	ATCCTTCC	ITS1F	CTTGGTCATTTAGAGGAAGTAA	R8	CGTCTTCA	ITS2	GCTGCGTTCTTCATCGATGC
wheat_soil_bx08	f	runBE09	T	GGTAG	F14	ACAGGCAT	ITS1F	CTTGGTCATTTAGAGGAAGTAA	R10	CATGAGCA	ITS2	GCTGCGTTCTTCATCGATGC
wheat_soil_WT08	f	runBE09	T	GGTAG	F16	ATCCTTCC	ITS1F	CTTGGTCATTTAGAGGAAGTAA	R2	TATGCGGT	ITS2	GCTGCGTTCTTCATCGATGC
wheat_soil_bx09	f	runBE09	T	GGTAG	F7	AAGACGAG	ITS1F	CTTGGTCATTTAGAGGAAGTAA	R10	CATGAGCA	ITS2	GCTGCGTTCTTCATCGATGC
wheat_soil_WT09	f	runBE09	T	GGTAG	F7	AAGACGAG	ITS1F	CTTGGTCATTTAGAGGAAGTAA	R7	CTGTATGC	ITS2	GCTGCGTTCTTCATCGATGC
wheat_soil_bx11	f	runBE09	T	GGTAG	F12	TGTCACAC	ITS1F	CTTGGTCATTTAGAGGAAGTAA	R10	CATGAGCA	ITS2	GCTGCGTTCTTCATCGATGC
wheat_soil_WT11	f	runBE09	T	GGTAG	F9	GTATCGAG	ITS1F	CTTGGTCATTTAGAGGAAGTAA	R10	CATGAGCA	ITS2	GCTGCGTTCTTCATCGATGC
wheat_soil_bx14	f	runBE09	T	GGTAG	F16	ATCCTTCC	ITS1F	CTTGGTCATTTAGAGGAAGTAA	R6	GATCTCAG	ITS2	GCTGCGTTCTTCATCGATGC
wheat_soil_WT14	f	runBE09	T	GGTAG	F13	AGTTGTGC	ITS1F	CTTGGTCATTTAGAGGAAGTAA	R5	GCTTCACA	ITS2	GCTGCGTTCTTCATCGATGC
wheat_soil_bx15	f	runBE09	T	GGTAG	F8	CCTACCTA	ITS1F	CTTGGTCATTTAGAGGAAGTAA	R8	CGTCTTCA	ITS2	GCTGCGTTCTTCATCGATGC
wheat_soil_WT15	f	runBE09	T	GGTAG	F6	CCACATTG	ITS1F	CTTGGTCATTTAGAGGAAGTAA	R9	CCTTGGAA	ITS2	GCTGCGTTCTTCATCGATGC
wheat_soil_bx17	f	runBE09	T	GGTAG	F10	TCGATGAC	ITS1F	CTTGGTCATTTAGAGGAAGTAA	R10	CATGAGCA	ITS2	GCTGCGTTCTTCATCGATGC
wheat_soil_WT17	f	runBE09	T	GGTAG	F9	GTATCGAG	ITS1F	CTTGGTCATTTAGAGGAAGTAA	R8	CGTCTTCA	ITS2	GCTGCGTTCTTCATCGATGC
wheat_soil_bx20	f	runBE09	T	GGTAG	F11	TTCGGCTA	ITS1F	CTTGGTCATTTAGAGGAAGTAA	R9	CCTTGGAA	ITS2	GCTGCGTTCTTCATCGATGC
wheat_soil_WT20	f	runBE09	T	GGTAG	F15	AGAACCAG	ITS1F	CTTGGTCATTTAGAGGAAGTAA	R2	TATGCGGT	ITS2	GCTGCGTTCTTCATCGATGC
wheat_soil_bx21	f	runBE09	T	GGTAG	F3	GCCAATAC	ITS1F	CTTGGTCATTTAGAGGAAGTAA	R7	CTGTATGC	ITS2	GCTGCGTTCTTCATCGATGC
wheat_soil_WT21	f	runBE09	T	GGTAG	F1	ACAACAGC	ITS1F	CTTGGTCATTTAGAGGAAGTAA	R8	CGTCTTCA	ITS2	GCTGCGTTCTTCATCGATGC
wheat_soil_bx23	f	runBE09	T	GGTAG	F16	ATCCTTCC	ITS1F	CTTGGTCATTTAGAGGAAGTAA	R3	GTGATCCA	ITS2	GCTGCGTTCTTCATCGATGC
wheat_soil_WT23	f	runBE09	T	GGTAG	F10	TCGATGAC	ITS1F	CTTGGTCATTTAGAGGAAGTAA	R8	CGTCTTCA	ITS2	GCTGCGTTCTTCATCGATGC
wheat_soil_bx26	f	runBE09	T	GGTAG	F13	AGTTGTGC	ITS1F	CTTGGTCATTTAGAGGAAGTAA	R2	TATGCGGT	ITS2	GCTGCGTTCTTCATCGATGC
wheat_soil_WT26	f	runBE09	T	GGTAG	F15	AGAACCAG	ITS1F	CTTGGTCATTTAGAGGAAGTAA	R6	GATCTCAG	ITS2	GCTGCGTTCTTCATCGATGC
wheat_soil_bx27	f	runBE09	T	GGTAG	F4	TAACGTCG	ITS1F	CTTGGTCATTTAGAGGAAGTAA	R11	TTCCAGGT	ITS2	GCTGCGTTCTTCATCGATGC
wheat_soil_WT27	f	runBE09	T	GGTAG	F5	AACAACCG	ITS1F	CTTGGTCATTTAGAGGAAGTAA	R11	TTCCAGGT	ITS2	GCTGCGTTCTTCATCGATGC
wheat_soil_bx29	f	runBE09	T	GGTAG	F10	TCGATGAC	ITS1F	CTTGGTCATTTAGAGGAAGTAA	R5	GCTTCACA	ITS2	GCTGCGTTCTTCATCGATGC
wheat_soil_WT29	f	runBE09	T	GGTAG	F11	TTCGGCTA	ITS1F	CTTGGTCATTTAGAGGAAGTAA	R10	CATGAGCA	ITS2	GCTGCGTTCTTCATCGATGC
wheat_rhizosphere_bx02	f	runBE09	T	GGTAG	F9	GTATCGAG	ITS1F	CTTGGTCATTTAGAGGAAGTAA	R7	CTGTATGC	ITS2	GCTGCGTTCTTCATCGATGC
wheat_rhizosphere_WT02	f	runBE09	T	GGTAG	F16	ATCCTTCC	ITS1F	CTTGGTCATTTAGAGGAAGTAA	R7	CTGTATGC	ITS2	GCTGCGTTCTTCATCGATGC
wheat_rhizosphere_bx03	f	runBE09	T	GGTAG	F2	CAACACAG	ITS1F	CTTGGTCATTTAGAGGAAGTAA	R7	CTGTATGC	ITS2	GCTGCGTTCTTCATCGATGC
wheat_rhizosphere_WT03	f	runBE09	T	GGTAG	F1	ACAACAGC	ITS1F	CTTGGTCATTTAGAGGAAGTAA	R9	CCTTGGAA	ITS2	GCTGCGTTCTTCATCGATGC
wheat_rhizosphere_bx05	f	runBE09	T	GGTAG	F16	ATCCTTCC	ITS1F	CTTGGTCATTTAGAGGAAGTAA	R9	CCTTGGAA	ITS2	GCTGCGTTCTTCATCGATGC
wheat_rhizosphere_WT05	f	runBE09	T	GGTAG	F10	TCGATGAC	ITS1F	CTTGGTCATTTAGAGGAAGTAA	R2	TATGCGGT	ITS2	GCTGCGTTCTTCATCGATGC
wheat_rhizosphere_bx08	f	runBE09	T	GGTAG	F12	TGTCACAC	ITS1F	CTTGGTCATTTAGAGGAAGTAA	R6	GATCTCAG	ITS2	GCTGCGTTCTTCATCGATGC
wheat_rhizosphere_WT08	f	runBE09	T	GGTAG	F15	AGAACCAG	ITS1F	CTTGGTCATTTAGAGGAAGTAA	R10	CATGAGCA	ITS2	GCTGCGTTCTTCATCGATGC
wheat_rhizosphere_bx09	f	runBE09	T	GGTAG	F7	AAGACGAG	ITS1F	CTTGGTCATTTAGAGGAAGTAA	R8	CGTCTTCA	ITS2	GCTGCGTTCTTCATCGATGC
wheat_rhizosphere_WT09	f	runBE09	T	GGTAG	F1	ACAACAGC	ITS1F	CTTGGTCATTTAGAGGAAGTAA	R7	CTGTATGC	ITS2	GCTGCGTTCTTCATCGATGC
wheat_rhizosphere_bx11	f	runBE09	T	GGTAG	F16	ATCCTTCC	ITS1F	CTTGGTCATTTAGAGGAAGTAA	R10	CATGAGCA	ITS2	GCTGCGTTCTTCATCGATGC
wheat_rhizosphere_WT11	f	runBE09	T	GGTAG	F14	ACAGGCAT	ITS1F	CTTGGTCATTTAGAGGAAGTAA	R7	CTGTATGC	ITS2	GCTGCGTTCTTCATCGATGC
wheat_rhizosphere_bx14	f	runBE09	T	GGTAG	F16	ATCCTTCC	ITS1F	CTTGGTCATTTAGAGGAAGTAA	R4	GGTACTTC	ITS2	GCTGCGTTCTTCATCGATGC
wheat_rhizosphere_WT14	f	runBE09	T	GGTAG	F11	TTCGGCTA	ITS1F	CTTGGTCATTTAGAGGAAGTAA	R3	GTGATCCA	ITS2	GCTGCGTTCTTCATCGATGC
wheat_rhizosphere_bx15	f	runBE09	T	GGTAG	F4	TAACGTCG	ITS1F	CTTGGTCATTTAGAGGAAGTAA	R8	CGTCTTCA	ITS2	GCTGCGTTCTTCATCGATGC
wheat_rhizosphere_WT15	f	runBE09	T	GGTAG	F4	TAACGTCG	ITS1F	CTTGGTCATTTAGAGGAAGTAA	R10	CATGAGCA	ITS2	GCTGCGTTCTTCATCGATGC
wheat_rhizosphere_bx17	f	runBE09	T	GGTAG	F13	AGTTGTGC	ITS1F	CTTGGTCATTTAGAGGAAGTAA	R1	TCTTCGAC	ITS2	GCTGCGTTCTTCATCGATGC
wheat_rhizosphere_WT17	f	runBE09	T	GGTAG	F9	GTATCGAG	ITS1F	CTTGGTCATTTAGAGGAAGTAA	R2	TATGCGGT	ITS2	GCTGCGTTCTTCATCGATGC
wheat_rhizosphere_bx20	f	runBE09	T	GGTAG	F13	AGTTGTGC	ITS1F	CTTGGTCATTTAGAGGAAGTAA	R9	CCTTGGAA	ITS2	GCTGCGTTCTTCATCGATGC
wheat_rhizosphere_WT20	f	runBE09	T	GGTAG	F16	ATCCTTCC	ITS1F	CTTGGTCATTTAGAGGAAGTAA	R5	GCTTCACA	ITS2	GCTGCGTTCTTCATCGATGC
wheat_rhizosphere_bx21	f	runBE09	T	GGTAG	F2	CAACACAG	ITS1F	CTTGGTCATTTAGAGGAAGTAA	R11	TTCCAGGT	ITS2	GCTGCGTTCTTCATCGATGC
wheat_rhizosphere_WT21	f	runBE09	T	GGTAG	F4	TAACGTCG	ITS1F	CTTGGTCATTTAGAGGAAGTAA	R9	CCTTGGAA	ITS2	GCTGCGTTCTTCATCGATGC
wheat_rhizosphere_bx23	f	runBE09	T	GGTAG	F13	AGTTGTGC	ITS1F	CTTGGTCATTTAGAGGAAGTAA	R8	CGTCTTCA	ITS2	GCTGCGTTCTTCATCGATGC
wheat_rhizosphere_WT23	f	runBE09	T	GGTAG	F12	TGTCACAC	ITS1F	CTTGGTCATTTAGAGGAAGTAA	R5	GCTTCACA	ITS2	GCTGCGTTCTTCATCGATGC
wheat_rhizosphere_bx26	f	runBE09	T	GGTAG	F15	AGAACCAG	ITS1F	CTTGGTCATTTAGAGGAAGTAA	R3	GTGATCCA	ITS2	GCTGCGTTCTTCATCGATGC
wheat_rhizosphere_WT26	f	runBE09	T	GGTAG	F12	TGTCACAC	ITS1F	CTTGGTCATTTAGAGGAAGTAA	R7	CTGTATGC	ITS2	GCTGCGTTCTTCATCGATGC
wheat_rhizosphere_bx27	f	runBE09	T	GGTAG	F7	AAGACGAG	ITS1F	CTTGGTCATTTAGAGGAAGTAA	R11	TTCCAGGT	ITS2	GCTGCGTTCTTCATCGATGC
wheat_rhizosphere_WT27	f	runBE09	T	GGTAG	F3	GCCAATAC	ITS1F	CTTGGTCATTTAGAGGAAGTAA	R11	TTCCAGGT	ITS2	GCTGCGTTCTTCATCGATGC
wheat_rhizosphere_bx29	f	runBE09	T	GGTAG	F15	AGAACCAG	ITS1F	CTTGGTCATTTAGAGGAAGTAA	R1	TCTTCGAC	ITS2	GCTGCGTTCTTCATCGATGC
wheat_rhizosphere_WT29	f	runBE09	T	GGTAG	F10	TCGATGAC	ITS1F	CTTGGTCATTTAGAGGAAGTAA	R9	CCTTGGAA	ITS2	GCTGCGTTCTTCATCGATGC
wheat_root_bx02	f	runBE09	T	GGTAG	F9	GTATCGAG	ITS1F	CTTGGTCATTTAGAGGAAGTAA	R9	CCTTGGAA	ITS2	GCTGCGTTCTTCATCGATGC
wheat_root_WT02	f	runBE09	T	GGTAG	F13	AGTTGTGC	ITS1F	CTTGGTCATTTAGAGGAAGTAA	R7	CTGTATGC	ITS2	GCTGCGTTCTTCATCGATGC
wheat_root_bx03	f	runBE09	T	GGTAG	F4	TAACGTCG	ITS1F	CTTGGTCATTTAGAGGAAGTAA	R7	CTGTATGC	ITS2	GCTGCGTTCTTCATCGATGC
wheat_root_WT03	f	runBE09	T	GGTAG	F5	AACAACCG	ITS1F	CTTGGTCATTTAGAGGAAGTAA	R8	CGTCTTCA	ITS2	GCTGCGTTCTTCATCGATGC
wheat_root_bx05	f	runBE09	T	GGTAG	F10	TCGATGAC	ITS1F	CTTGGTCATTTAGAGGAAGTAA	R4	GGTACTTC	ITS2	GCTGCGTTCTTCATCGATGC
wheat_root_WT05	f	runBE09	T	GGTAG	F14	ACAGGCAT	ITS1F	CTTGGTCATTTAGAGGAAGTAA	R3	GTGATCCA	ITS2	GCTGCGTTCTTCATCGATGC
wheat_root_bx08	f	runBE09	T	GGTAG	F11	TTCGGCTA	ITS1F	CTTGGTCATTTAGAGGAAGTAA	R7	CTGTATGC	ITS2	GCTGCGTTCTTCATCGATGC
wheat_root_WT08	f	runBE09	T	GGTAG	F14	ACAGGCAT	ITS1F	CTTGGTCATTTAGAGGAAGTAA	R8	CGTCTTCA	ITS2	GCTGCGTTCTTCATCGATGC
wheat_root_bx09	f	runBE09	T	GGTAG	F8	CCTACCTA	ITS1F	CTTGGTCATTTAGAGGAAGTAA	R10	CATGAGCA	ITS2	GCTGCGTTCTTCATCGATGC
wheat_root_WT09	f	runBE09	T	GGTAG	F8	CCTACCTA	ITS1F	CTTGGTCATTTAGAGGAAGTAA	R7	CTGTATGC	ITS2	GCTGCGTTCTTCATCGATGC
wheat_root_bx11	f	runBE09	T	GGTAG	F11	TTCGGCTA	ITS1F	CTTGGTCATTTAGAGGAAGTAA	R6	GATCTCAG	ITS2	GCTGCGTTCTTCATCGATGC
wheat_root_WT11	f	runBE09	T	GGTAG	F15	AGAACCAG	ITS1F	CTTGGTCATTTAGAGGAAGTAA	R8	CGTCTTCA	ITS2	GCTGCGTTCTTCATCGATGC
wheat_root_bx14	f	runBE09	T	GGTAG	F14	ACAGGCAT	ITS1F	CTTGGTCATTTAGAGGAAGTAA	R2	TATGCGGT	ITS2	GCTGCGTTCTTCATCGATGC
wheat_root_WT14	f	runBE09	T	GGTAG	F12	TGTCACAC	ITS1F	CTTGGTCATTTAGAGGAAGTAA	R3	GTGATCCA	ITS2	GCTGCGTTCTTCATCGATGC
wheat_root_bx15	f	runBE09	T	GGTAG	F6	CCACATTG	ITS1F	CTTGGTCATTTAGAGGAAGTAA	R7	CTGTATGC	ITS2	GCTGCGTTCTTCATCGATGC
wheat_root_WT15	f	runBE09	T	GGTAG	F6	CCACATTG	ITS1F	CTTGGTCATTTAGAGGAAGTAA	R8	CGTCTTCA	ITS2	GCTGCGTTCTTCATCGATGC
wheat_root_bx17	f	runBE09	T	GGTAG	F13	AGTTGTGC	ITS1F	CTTGGTCATTTAGAGGAAGTAA	R4	GGTACTTC	ITS2	GCTGCGTTCTTCATCGATGC
wheat_root_WT17	f	runBE09	T	GGTAG	F11	TTCGGCTA	ITS1F	CTTGGTCATTTAGAGGAAGTAA	R4	GGTACTTC	ITS2	GCTGCGTTCTTCATCGATGC
wheat_root_bx20	f	runBE09	T	GGTAG	F12	TGTCACAC	ITS1F	CTTGGTCATTTAGAGGAAGTAA	R9	CCTTGGAA	ITS2	GCTGCGTTCTTCATCGATGC
wheat_root_WT20	f	runBE09	T	GGTAG	F11	TTCGGCTA	ITS1F	CTTGGTCATTTAGAGGAAGTAA	R2	TATGCGGT	ITS2	GCTGCGTTCTTCATCGATGC
wheat_root_bx21	f	runBE09	T	GGTAG	F5	AACAACCG	ITS1F	CTTGGTCATTTAGAGGAAGTAA	R7	CTGTATGC	ITS2	GCTGCGTTCTTCATCGATGC
wheat_root_WT21	f	runBE09	T	GGTAG	F1	ACAACAGC	ITS1F	CTTGGTCATTTAGAGGAAGTAA	R10	CATGAGCA	ITS2	GCTGCGTTCTTCATCGATGC
wheat_root_bx23	f	runBE09	T	GGTAG	F14	ACAGGCAT	ITS1F	CTTGGTCATTTAGAGGAAGTAA	R9	CCTTGGAA	ITS2	GCTGCGTTCTTCATCGATGC
wheat_root_WT23	f	runBE09	T	GGTAG	F9	GTATCGAG	ITS1F	CTTGGTCATTTAGAGGAAGTAA	R4	GGTACTTC	ITS2	GCTGCGTTCTTCATCGATGC
wheat_root_bx26	f	runBE09	T	GGTAG	F9	GTATCGAG	ITS1F	CTTGGTCATTTAGAGGAAGTAA	R5	GCTTCACA	ITS2	GCTGCGTTCTTCATCGATGC
wheat_root_WT26	f	runBE09	T	GGTAG	F9	GTATCGAG	ITS1F	CTTGGTCATTTAGAGGAAGTAA	R3	GTGATCCA	ITS2	GCTGCGTTCTTCATCGATGC
wheat_root_bx27	f	runBE09	T	GGTAG	F2	CAACACAG	ITS1F	CTTGGTCATTTAGAGGAAGTAA	R10	CATGAGCA	ITS2	GCTGCGTTCTTCATCGATGC
wheat_root_WT27	f	runBE09	T	GGTAG	F6	CCACATTG	ITS1F	CTTGGTCATTTAGAGGAAGTAA	R11	TTCCAGGT	ITS2	GCTGCGTTCTTCATCGATGC
wheat_root_bx29	f	runBE09	T	GGTAG	F9	GTATCGAG	ITS1F	CTTGGTCATTTAGAGGAAGTAA	R6	GATCTCAG	ITS2	GCTGCGTTCTTCATCGATGC
wheat_root_WT29	f	runBE09	T	GGTAG	F9	GTATCGAG	ITS1F	CTTGGTCATTTAGAGGAAGTAA	R1	TCTTCGAC	ITS2	GCTGCGTTCTTCATCGATGC
Empty_extraction	f	runBE09	T	GGTAG	F13	AGTTGTGC	ITS1F	CTTGGTCATTTAGAGGAAGTAA	R6	GATCTCAG	ITS2	GCTGCGTTCTTCATCGATGC
Empty_extraction	f	runBE09	T	GGTAG	F10	TCGATGAC	ITS1F	CTTGGTCATTTAGAGGAAGTAA	R3	GTGATCCA	ITS2	GCTGCGTTCTTCATCGATGC
Empty_extraction	f	runBE09	T	GGTAG	F2	CAACACAG	ITS1F	CTTGGTCATTTAGAGGAAGTAA	R9	CCTTGGAA	ITS2	GCTGCGTTCTTCATCGATGC
PCR_empty_control	f	runBE09	T	GGTAG	F9	GTATCGAG	ITS1F	CTTGGTCATTTAGAGGAAGTAA	R11	TTCCAGGT	ITS2	GCTGCGTTCTTCATCGATGC
PCR_empty_control	f	runBE09	T	GGTAG	F8	CCTACCTA	ITS1F	CTTGGTCATTTAGAGGAAGTAA	R11	TTCCAGGT	ITS2	GCTGCGTTCTTCATCGATGC
maize_rhizosphere_m_bx01	b	runBE10	T	GGTAG	F61	CAGTCACA	799F	AACMGGATTAGATACCCKG	R46	GCTACTCT	1193R	ACGTCATCCCCACCTTCC
maize_rhizosphere_m_WT01	b	runBE10	T	GGTAG	F64	AGCGTGTA	799F	AACMGGATTAGATACCCKG	R46	GCTACTCT	1193R	ACGTCATCCCCACCTTCC
maize_rhizosphere_m_bx03	b	runBE10	T	GGTAG	F69	CTATGCCT	799F	AACMGGATTAGATACCCKG	R43	TAGCTGAG	1193R	ACGTCATCCCCACCTTCC
maize_rhizosphere_m_WT03	b	runBE10	T	GGTAG	F74	GCATAGTC	799F	AACMGGATTAGATACCCKG	R40	ACTGCACT	1193R	ACGTCATCCCCACCTTCC
maize_rhizosphere_m_bx04	b	runBE10	T	GGTAG	F61	CAGTCACA	799F	AACMGGATTAGATACCCKG	R43	TAGCTGAG	1193R	ACGTCATCCCCACCTTCC
maize_rhizosphere_m_WT04	b	runBE10	T	GGTAG	F66	GCATCCTA	799F	AACMGGATTAGATACCCKG	R40	ACTGCACT	1193R	ACGTCATCCCCACCTTCC
maize_rhizosphere_m_bx07	b	runBE10	T	GGTAG	F66	GCATCCTA	799F	AACMGGATTAGATACCCKG	R47	TCGCTATC	1193R	ACGTCATCCCCACCTTCC
maize_rhizosphere_m_WT07	b	runBE10	T	GGTAG	F63	TACTAGCG	799F	AACMGGATTAGATACCCKG	R46	GCTACTCT	1193R	ACGTCATCCCCACCTTCC
maize_rhizosphere_m_bx09	b	runBE10	T	GGTAG	F68	ATCGTCTC	799F	AACMGGATTAGATACCCKG	R45	CGTGTGAT	1193R	ACGTCATCCCCACCTTCC
maize_rhizosphere_m_WT09	b	runBE10	T	GGTAG	F75	TCGTCTGA	799F	AACMGGATTAGATACCCKG	R41	CATGTGTG	1193R	ACGTCATCCCCACCTTCC
maize_rhizosphere_m_bx10	b	runBE10	T	GGTAG	F63	TACTAGCG	799F	AACMGGATTAGATACCCKG	R43	TAGCTGAG	1193R	ACGTCATCCCCACCTTCC
maize_rhizosphere_m_WT10	b	runBE10	T	GGTAG	F67	TCAGACAC	799F	AACMGGATTAGATACCCKG	R47	TCGCTATC	1193R	ACGTCATCCCCACCTTCC
maize_root_m_bx01	b	runBE10	T	GGTAG	F65	CGATCGAT	799F	AACMGGATTAGATACCCKG	R41	CATGTGTG	1193R	ACGTCATCCCCACCTTCC
maize_root_m_WT01	b	runBE10	T	GGTAG	F62	GACTACGA	799F	AACMGGATTAGATACCCKG	R47	TCGCTATC	1193R	ACGTCATCCCCACCTTCC
maize_root_m_bx04	b	runBE10	T	GGTAG	F60	ACGCAGTA	799F	AACMGGATTAGATACCCKG	R49	CTGAACGT	1193R	ACGTCATCCCCACCTTCC
maize_root_m_WT04	b	runBE10	T	GGTAG	F67	TCAGACAC	799F	AACMGGATTAGATACCCKG	R46	GCTACTCT	1193R	ACGTCATCCCCACCTTCC
maize_root_m_bx06	b	runBE10	T	GGTAG	F71	TGAGCTGT	799F	AACMGGATTAGATACCCKG	R41	CATGTGTG	1193R	ACGTCATCCCCACCTTCC
maize_root_m_WT06	b	runBE10	T	GGTAG	F72	ACACGAGA	799F	AACMGGATTAGATACCCKG	R42	GATACCTG	1193R	ACGTCATCCCCACCTTCC
maize_root_m_bx07	b	runBE10	T	GGTAG	F61	CAGTCACA	799F	AACMGGATTAGATACCCKG	R40	ACTGCACT	1193R	ACGTCATCCCCACCTTCC
maize_root_m_WT07	b	runBE10	T	GGTAG	F63	TACTAGCG	799F	AACMGGATTAGATACCCKG	R40	ACTGCACT	1193R	ACGTCATCCCCACCTTCC
maize_root_m_bx10	b	runBE10	T	GGTAG	F64	AGCGTGTA	799F	AACMGGATTAGATACCCKG	R47	TCGCTATC	1193R	ACGTCATCCCCACCTTCC
maize_root_m_WT10	b	runBE10	T	GGTAG	F67	TCAGACAC	799F	AACMGGATTAGATACCCKG	R40	ACTGCACT	1193R	ACGTCATCCCCACCTTCC
maize_soil_m_bx01	b	runBE10	T	GGTAG	F65	CGATCGAT	799F	AACMGGATTAGATACCCKG	R44	AGTACACG	1193R	ACGTCATCCCCACCTTCC
maize_soil_m_WT01	b	runBE10	T	GGTAG	F65	CGATCGAT	799F	AACMGGATTAGATACCCKG	R46	GCTACTCT	1193R	ACGTCATCCCCACCTTCC
maize_soil_m_bx03	b	runBE10	T	GGTAG	F70	GTAGCGTA	799F	AACMGGATTAGATACCCKG	R41	CATGTGTG	1193R	ACGTCATCCCCACCTTCC
maize_soil_m_WT03	b	runBE10	T	GGTAG	F75	TCGTCTGA	799F	AACMGGATTAGATACCCKG	R40	ACTGCACT	1193R	ACGTCATCCCCACCTTCC
maize_soil_m_bx04	b	runBE10	T	GGTAG	F66	GCATCCTA	799F	AACMGGATTAGATACCCKG	R44	AGTACACG	1193R	ACGTCATCCCCACCTTCC
maize_soil_m_WT04	b	runBE10	T	GGTAG	F65	CGATCGAT	799F	AACMGGATTAGATACCCKG	R48	ATGCGTCA	1193R	ACGTCATCCCCACCTTCC
maize_soil_m_bx07	b	runBE10	T	GGTAG	F66	GCATCCTA	799F	AACMGGATTAGATACCCKG	R42	GATACCTG	1193R	ACGTCATCCCCACCTTCC
maize_soil_m_WT07	b	runBE10	T	GGTAG	F60	ACGCAGTA	799F	AACMGGATTAGATACCCKG	R47	TCGCTATC	1193R	ACGTCATCCCCACCTTCC
maize_soil_m_bx09	b	runBE10	T	GGTAG	F72	ACACGAGA	799F	AACMGGATTAGATACCCKG	R44	AGTACACG	1193R	ACGTCATCCCCACCTTCC
maize_soil_m_WT09	b	runBE10	T	GGTAG	F71	TGAGCTGT	799F	AACMGGATTAGATACCCKG	R44	AGTACACG	1193R	ACGTCATCCCCACCTTCC
maize_soil_m_bx10	b	runBE10	T	GGTAG	F62	GACTACGA	799F	AACMGGATTAGATACCCKG	R46	GCTACTCT	1193R	ACGTCATCCCCACCTTCC
maize_soil_m_WT10	b	runBE10	T	GGTAG	F63	TACTAGCG	799F	AACMGGATTAGATACCCKG	R48	ATGCGTCA	1193R	ACGTCATCCCCACCTTCC
wheat_soil_bx01	b	runBE10	T	GGTAG	F62	GACTACGA	799F	AACMGGATTAGATACCCKG	R43	TAGCTGAG	1193R	ACGTCATCCCCACCTTCC
wheat_soil_WT01	b	runBE10	T	GGTAG	F65	CGATCGAT	799F	AACMGGATTAGATACCCKG	R42	GATACCTG	1193R	ACGTCATCCCCACCTTCC
wheat_soil_bx04	b	runBE10	T	GGTAG	F62	GACTACGA	799F	AACMGGATTAGATACCCKG	R49	CTGAACGT	1193R	ACGTCATCCCCACCTTCC
wheat_soil_WT04	b	runBE10	T	GGTAG	F62	GACTACGA	799F	AACMGGATTAGATACCCKG	R41	CATGTGTG	1193R	ACGTCATCCCCACCTTCC
wheat_soil_bx06	b	runBE10	T	GGTAG	F70	GTAGCGTA	799F	AACMGGATTAGATACCCKG	R40	ACTGCACT	1193R	ACGTCATCCCCACCTTCC
wheat_soil_WT06	b	runBE10	T	GGTAG	F73	CTAGCAGT	799F	AACMGGATTAGATACCCKG	R42	GATACCTG	1193R	ACGTCATCCCCACCTTCC
wheat_soil_bx07	b	runBE10	T	GGTAG	F65	CGATCGAT	799F	AACMGGATTAGATACCCKG	R47	TCGCTATC	1193R	ACGTCATCCCCACCTTCC
wheat_soil_WT07	b	runBE10	T	GGTAG	F60	ACGCAGTA	799F	AACMGGATTAGATACCCKG	R43	TAGCTGAG	1193R	ACGTCATCCCCACCTTCC
wheat_soil_bx10	b	runBE10	T	GGTAG	F60	ACGCAGTA	799F	AACMGGATTAGATACCCKG	R44	AGTACACG	1193R	ACGTCATCCCCACCTTCC
wheat_soil_WT10	b	runBE10	T	GGTAG	F65	CGATCGAT	799F	AACMGGATTAGATACCCKG	R50	GTCATCGT	1193R	ACGTCATCCCCACCTTCC
wheat_soil_bx12	b	runBE10	T	GGTAG	F69	CTATGCCT	799F	AACMGGATTAGATACCCKG	R42	GATACCTG	1193R	ACGTCATCCCCACCTTCC
wheat_soil_WT12	b	runBE10	T	GGTAG	F75	TCGTCTGA	799F	AACMGGATTAGATACCCKG	R44	AGTACACG	1193R	ACGTCATCCCCACCTTCC
wheat_soil_bx13	b	runBE10	T	GGTAG	F62	GACTACGA	799F	AACMGGATTAGATACCCKG	R45	CGTGTGAT	1193R	ACGTCATCCCCACCTTCC
wheat_soil_WT13	b	runBE10	T	GGTAG	F66	GCATCCTA	799F	AACMGGATTAGATACCCKG	R45	CGTGTGAT	1193R	ACGTCATCCCCACCTTCC
wheat_soil_bx16	b	runBE10	T	GGTAG	F64	AGCGTGTA	799F	AACMGGATTAGATACCCKG	R49	CTGAACGT	1193R	ACGTCATCCCCACCTTCC
wheat_soil_WT16	b	runBE10	T	GGTAG	F61	CAGTCACA	799F	AACMGGATTAGATACCCKG	R42	GATACCTG	1193R	ACGTCATCCCCACCTTCC
wheat_soil_bx18	b	runBE10	T	GGTAG	F68	ATCGTCTC	799F	AACMGGATTAGATACCCKG	R42	GATACCTG	1193R	ACGTCATCCCCACCTTCC
wheat_soil_WT18	b	runBE10	T	GGTAG	F73	CTAGCAGT	799F	AACMGGATTAGATACCCKG	R41	CATGTGTG	1193R	ACGTCATCCCCACCTTCC
wheat_soil_bx19	b	runBE10	T	GGTAG	F62	GACTACGA	799F	AACMGGATTAGATACCCKG	R48	ATGCGTCA	1193R	ACGTCATCCCCACCTTCC
wheat_soil_WT19	b	runBE10	T	GGTAG	F67	TCAGACAC	799F	AACMGGATTAGATACCCKG	R43	TAGCTGAG	1193R	ACGTCATCCCCACCTTCC
wheat_soil_bx22	b	runBE10	T	GGTAG	F66	GCATCCTA	799F	AACMGGATTAGATACCCKG	R41	CATGTGTG	1193R	ACGTCATCCCCACCTTCC
wheat_soil_WT22	b	runBE10	T	GGTAG	F64	AGCGTGTA	799F	AACMGGATTAGATACCCKG	R44	AGTACACG	1193R	ACGTCATCCCCACCTTCC
wheat_soil_bx24	b	runBE10	T	GGTAG	F69	CTATGCCT	799F	AACMGGATTAGATACCCKG	R41	CATGTGTG	1193R	ACGTCATCCCCACCTTCC
wheat_soil_WT24	b	runBE10	T	GGTAG	F72	ACACGAGA	799F	AACMGGATTAGATACCCKG	R41	CATGTGTG	1193R	ACGTCATCCCCACCTTCC
wheat_soil_bx25	b	runBE10	T	GGTAG	F60	ACGCAGTA	799F	AACMGGATTAGATACCCKG	R46	GCTACTCT	1193R	ACGTCATCCCCACCTTCC
wheat_soil_WT25	b	runBE10	T	GGTAG	F61	CAGTCACA	799F	AACMGGATTAGATACCCKG	R48	ATGCGTCA	1193R	ACGTCATCCCCACCTTCC
wheat_soil_bx28	b	runBE10	T	GGTAG	F60	ACGCAGTA	799F	AACMGGATTAGATACCCKG	R40	ACTGCACT	1193R	ACGTCATCCCCACCTTCC
wheat_soil_WT28	b	runBE10	T	GGTAG	F66	GCATCCTA	799F	AACMGGATTAGATACCCKG	R46	GCTACTCT	1193R	ACGTCATCCCCACCTTCC
wheat_soil_bx30	b	runBE10	T	GGTAG	F73	CTAGCAGT	799F	AACMGGATTAGATACCCKG	R40	ACTGCACT	1193R	ACGTCATCCCCACCTTCC
wheat_soil_WT30	b	runBE10	T	GGTAG	F73	CTAGCAGT	799F	AACMGGATTAGATACCCKG	R43	TAGCTGAG	1193R	ACGTCATCCCCACCTTCC
wheat_rhizosphere_bx01	b	runBE10	T	GGTAG	F60	ACGCAGTA	799F	AACMGGATTAGATACCCKG	R42	GATACCTG	1193R	ACGTCATCCCCACCTTCC
wheat_rhizosphere_WT01	b	runBE10	T	GGTAG	F63	TACTAGCG	799F	AACMGGATTAGATACCCKG	R47	TCGCTATC	1193R	ACGTCATCCCCACCTTCC
wheat_rhizosphere_bx04	b	runBE10	T	GGTAG	F67	TCAGACAC	799F	AACMGGATTAGATACCCKG	R41	CATGTGTG	1193R	ACGTCATCCCCACCTTCC
wheat_rhizosphere_WT04	b	runBE10	T	GGTAG	F61	CAGTCACA	799F	AACMGGATTAGATACCCKG	R47	TCGCTATC	1193R	ACGTCATCCCCACCTTCC
wheat_rhizosphere_bx06	b	runBE10	T	GGTAG	F68	ATCGTCTC	799F	AACMGGATTAGATACCCKG	R41	CATGTGTG	1193R	ACGTCATCCCCACCTTCC
wheat_rhizosphere_WT06	b	runBE10	T	GGTAG	F74	GCATAGTC	799F	AACMGGATTAGATACCCKG	R42	GATACCTG	1193R	ACGTCATCCCCACCTTCC
wheat_rhizosphere_bx07	b	runBE10	T	GGTAG	F66	GCATCCTA	799F	AACMGGATTAGATACCCKG	R43	TAGCTGAG	1193R	ACGTCATCCCCACCTTCC
wheat_rhizosphere_WT07	b	runBE10	T	GGTAG	F64	AGCGTGTA	799F	AACMGGATTAGATACCCKG	R48	ATGCGTCA	1193R	ACGTCATCCCCACCTTCC
wheat_rhizosphere_bx10	b	runBE10	T	GGTAG	F60	ACGCAGTA	799F	AACMGGATTAGATACCCKG	R45	CGTGTGAT	1193R	ACGTCATCCCCACCTTCC
wheat_rhizosphere_WT10	b	runBE10	T	GGTAG	F63	TACTAGCG	799F	AACMGGATTAGATACCCKG	R44	AGTACACG	1193R	ACGTCATCCCCACCTTCC
wheat_rhizosphere_bx12	b	runBE10	T	GGTAG	F75	TCGTCTGA	799F	AACMGGATTAGATACCCKG	R42	GATACCTG	1193R	ACGTCATCCCCACCTTCC
wheat_rhizosphere_WT12	b	runBE10	T	GGTAG	F68	ATCGTCTC	799F	AACMGGATTAGATACCCKG	R40	ACTGCACT	1193R	ACGTCATCCCCACCTTCC
wheat_rhizosphere_bx13	b	runBE10	T	GGTAG	F61	CAGTCACA	799F	AACMGGATTAGATACCCKG	R41	CATGTGTG	1193R	ACGTCATCCCCACCTTCC
wheat_rhizosphere_WT13	b	runBE10	T	GGTAG	F66	GCATCCTA	799F	AACMGGATTAGATACCCKG	R48	ATGCGTCA	1193R	ACGTCATCCCCACCTTCC
wheat_rhizosphere_bx16	b	runBE10	T	GGTAG	F63	TACTAGCG	799F	AACMGGATTAGATACCCKG	R49	CTGAACGT	1193R	ACGTCATCCCCACCTTCC
wheat_rhizosphere_WT16	b	runBE10	T	GGTAG	F60	ACGCAGTA	799F	AACMGGATTAGATACCCKG	R50	GTCATCGT	1193R	ACGTCATCCCCACCTTCC
wheat_rhizosphere_bx18	b	runBE10	T	GGTAG	F69	CTATGCCT	799F	AACMGGATTAGATACCCKG	R40	ACTGCACT	1193R	ACGTCATCCCCACCTTCC
wheat_rhizosphere_WT18	b	runBE10	T	GGTAG	F68	ATCGTCTC	799F	AACMGGATTAGATACCCKG	R43	TAGCTGAG	1193R	ACGTCATCCCCACCTTCC
wheat_rhizosphere_bx19	b	runBE10	T	GGTAG	F64	AGCGTGTA	799F	AACMGGATTAGATACCCKG	R45	CGTGTGAT	1193R	ACGTCATCCCCACCTTCC
wheat_rhizosphere_WT19	b	runBE10	T	GGTAG	F60	ACGCAGTA	799F	AACMGGATTAGATACCCKG	R48	ATGCGTCA	1193R	ACGTCATCCCCACCTTCC
wheat_rhizosphere_bx22	b	runBE10	T	GGTAG	F63	TACTAGCG	799F	AACMGGATTAGATACCCKG	R42	GATACCTG	1193R	ACGTCATCCCCACCTTCC
wheat_rhizosphere_WT22	b	runBE10	T	GGTAG	F62	GACTACGA	799F	AACMGGATTAGATACCCKG	R42	GATACCTG	1193R	ACGTCATCCCCACCTTCC
wheat_rhizosphere_bx24	b	runBE10	T	GGTAG	F75	TCGTCTGA	799F	AACMGGATTAGATACCCKG	R43	TAGCTGAG	1193R	ACGTCATCCCCACCTTCC
wheat_rhizosphere_WT24	b	runBE10	T	GGTAG	F73	CTAGCAGT	799F	AACMGGATTAGATACCCKG	R44	AGTACACG	1193R	ACGTCATCCCCACCTTCC
wheat_rhizosphere_bx25	b	runBE10	T	GGTAG	F67	TCAGACAC	799F	AACMGGATTAGATACCCKG	R44	AGTACACG	1193R	ACGTCATCCCCACCTTCC
wheat_rhizosphere_WT25	b	runBE10	T	GGTAG	F67	TCAGACAC	799F	AACMGGATTAGATACCCKG	R48	ATGCGTCA	1193R	ACGTCATCCCCACCTTCC
wheat_rhizosphere_bx28	b	runBE10	T	GGTAG	F61	CAGTCACA	799F	AACMGGATTAGATACCCKG	R49	CTGAACGT	1193R	ACGTCATCCCCACCTTCC
wheat_rhizosphere_WT28	b	runBE10	T	GGTAG	F61	CAGTCACA	799F	AACMGGATTAGATACCCKG	R45	CGTGTGAT	1193R	ACGTCATCCCCACCTTCC
wheat_rhizosphere_bx30	b	runBE10	T	GGTAG	F70	GTAGCGTA	799F	AACMGGATTAGATACCCKG	R44	AGTACACG	1193R	ACGTCATCCCCACCTTCC
wheat_rhizosphere_WT30	b	runBE10	T	GGTAG	F74	GCATAGTC	799F	AACMGGATTAGATACCCKG	R41	CATGTGTG	1193R	ACGTCATCCCCACCTTCC
wheat_root_bx01	b	runBE10	T	GGTAG	F63	TACTAGCG	799F	AACMGGATTAGATACCCKG	R45	CGTGTGAT	1193R	ACGTCATCCCCACCTTCC
wheat_root_WT01	b	runBE10	T	GGTAG	F67	TCAGACAC	799F	AACMGGATTAGATACCCKG	R42	GATACCTG	1193R	ACGTCATCCCCACCTTCC
wheat_root_bx04	b	runBE10	T	GGTAG	F63	TACTAGCG	799F	AACMGGATTAGATACCCKG	R50	GTCATCGT	1193R	ACGTCATCCCCACCTTCC
wheat_root_WT04	b	runBE10	T	GGTAG	F62	GACTACGA	799F	AACMGGATTAGATACCCKG	R50	GTCATCGT	1193R	ACGTCATCCCCACCTTCC
wheat_root_bx06	b	runBE10	T	GGTAG	F74	GCATAGTC	799F	AACMGGATTAGATACCCKG	R44	AGTACACG	1193R	ACGTCATCCCCACCTTCC
wheat_root_WT06	b	runBE10	T	GGTAG	F72	ACACGAGA	799F	AACMGGATTAGATACCCKG	R43	TAGCTGAG	1193R	ACGTCATCCCCACCTTCC
wheat_root_bx07	b	runBE10	T	GGTAG	F62	GACTACGA	799F	AACMGGATTAGATACCCKG	R40	ACTGCACT	1193R	ACGTCATCCCCACCTTCC
wheat_root_WT07	b	runBE10	T	GGTAG	F62	GACTACGA	799F	AACMGGATTAGATACCCKG	R44	AGTACACG	1193R	ACGTCATCCCCACCTTCC
wheat_root_bx10	b	runBE10	T	GGTAG	F64	AGCGTGTA	799F	AACMGGATTAGATACCCKG	R43	TAGCTGAG	1193R	ACGTCATCCCCACCTTCC
wheat_root_WT10	b	runBE10	T	GGTAG	F64	AGCGTGTA	799F	AACMGGATTAGATACCCKG	R42	GATACCTG	1193R	ACGTCATCCCCACCTTCC
wheat_root_bx12	b	runBE10	T	GGTAG	F68	ATCGTCTC	799F	AACMGGATTAGATACCCKG	R44	AGTACACG	1193R	ACGTCATCCCCACCTTCC
wheat_root_WT12	b	runBE10	T	GGTAG	F70	GTAGCGTA	799F	AACMGGATTAGATACCCKG	R42	GATACCTG	1193R	ACGTCATCCCCACCTTCC
wheat_root_bx13	b	runBE10	T	GGTAG	F61	CAGTCACA	799F	AACMGGATTAGATACCCKG	R44	AGTACACG	1193R	ACGTCATCCCCACCTTCC
wheat_root_WT13	b	runBE10	T	GGTAG	F66	GCATCCTA	799F	AACMGGATTAGATACCCKG	R49	CTGAACGT	1193R	ACGTCATCCCCACCTTCC
wheat_root_bx16	b	runBE10	T	GGTAG	F64	AGCGTGTA	799F	AACMGGATTAGATACCCKG	R50	GTCATCGT	1193R	ACGTCATCCCCACCTTCC
wheat_root_WT16	b	runBE10	T	GGTAG	F67	TCAGACAC	799F	AACMGGATTAGATACCCKG	R49	CTGAACGT	1193R	ACGTCATCCCCACCTTCC
wheat_root_bx18	b	runBE10	T	GGTAG	F69	CTATGCCT	799F	AACMGGATTAGATACCCKG	R44	AGTACACG	1193R	ACGTCATCCCCACCTTCC
wheat_root_WT18	b	runBE10	T	GGTAG	F74	GCATAGTC	799F	AACMGGATTAGATACCCKG	R43	TAGCTGAG	1193R	ACGTCATCCCCACCTTCC
wheat_root_bx19	b	runBE10	T	GGTAG	F65	CGATCGAT	799F	AACMGGATTAGATACCCKG	R45	CGTGTGAT	1193R	ACGTCATCCCCACCTTCC
wheat_root_WT19	b	runBE10	T	GGTAG	F61	CAGTCACA	799F	AACMGGATTAGATACCCKG	R50	GTCATCGT	1193R	ACGTCATCCCCACCTTCC
wheat_root_bx22	b	runBE10	T	GGTAG	F65	CGATCGAT	799F	AACMGGATTAGATACCCKG	R40	ACTGCACT	1193R	ACGTCATCCCCACCTTCC
wheat_root_WT22	b	runBE10	T	GGTAG	F67	TCAGACAC	799F	AACMGGATTAGATACCCKG	R45	CGTGTGAT	1193R	ACGTCATCCCCACCTTCC
wheat_root_bx24	b	runBE10	T	GGTAG	F71	TGAGCTGT	799F	AACMGGATTAGATACCCKG	R42	GATACCTG	1193R	ACGTCATCCCCACCTTCC
wheat_root_WT24	b	runBE10	T	GGTAG	F71	TGAGCTGT	799F	AACMGGATTAGATACCCKG	R40	ACTGCACT	1193R	ACGTCATCCCCACCTTCC
wheat_root_bx25	b	runBE10	T	GGTAG	F60	ACGCAGTA	799F	AACMGGATTAGATACCCKG	R41	CATGTGTG	1193R	ACGTCATCCCCACCTTCC
wheat_root_WT25	b	runBE10	T	GGTAG	F64	AGCGTGTA	799F	AACMGGATTAGATACCCKG	R41	CATGTGTG	1193R	ACGTCATCCCCACCTTCC
wheat_root_bx28	b	runBE10	T	GGTAG	F63	TACTAGCG	799F	AACMGGATTAGATACCCKG	R41	CATGTGTG	1193R	ACGTCATCCCCACCTTCC
wheat_root_WT28	b	runBE10	T	GGTAG	F65	CGATCGAT	799F	AACMGGATTAGATACCCKG	R43	TAGCTGAG	1193R	ACGTCATCCCCACCTTCC
wheat_root_bx30	b	runBE10	T	GGTAG	F72	ACACGAGA	799F	AACMGGATTAGATACCCKG	R40	ACTGCACT	1193R	ACGTCATCCCCACCTTCC
wheat_root_WT30	b	runBE10	T	GGTAG	F70	GTAGCGTA	799F	AACMGGATTAGATACCCKG	R43	TAGCTGAG	1193R	ACGTCATCCCCACCTTCC
Empty_extraction	b	runBE10	T	GGTAG	F65	CGATCGAT	799F	AACMGGATTAGATACCCKG	R49	CTGAACGT	1193R	ACGTCATCCCCACCTTCC
Empty_extraction	b	runBE10	T	GGTAG	F71	TGAGCTGT	799F	AACMGGATTAGATACCCKG	R43	TAGCTGAG	1193R	ACGTCATCCCCACCTTCC
Empty_extraction	b	runBE10	T	GGTAG	F64	AGCGTGTA	799F	AACMGGATTAGATACCCKG	R40	ACTGCACT	1193R	ACGTCATCCCCACCTTCC
PCR_empty_control	b	runBE10	T	GGTAG	F66	GCATCCTA	799F	AACMGGATTAGATACCCKG	R50	GTCATCGT	1193R	ACGTCATCCCCACCTTCC
PCR_empty_control	b	runBE10	T	GGTAG	F69	CTATGCCT	799F	AACMGGATTAGATACCCKG	R45	CGTGTGAT	1193R	ACGTCATCCCCACCTTCC
maize_rhizosphere_m_bx01	f	runBE10	T	GGTAG	F2	CAACACAG	ITS1F	CTTGGTCATTTAGAGGAAGTAA	R7	CTGTATGC	ITS2	GCTGCGTTCTTCATCGATGC
maize_rhizosphere_m_WT01	f	runBE10	T	GGTAG	F5	AACAACCG	ITS1F	CTTGGTCATTTAGAGGAAGTAA	R7	CTGTATGC	ITS2	GCTGCGTTCTTCATCGATGC
maize_rhizosphere_m_bx03	f	runBE10	T	GGTAG	F10	TCGATGAC	ITS1F	CTTGGTCATTTAGAGGAAGTAA	R4	GGTACTTC	ITS2	GCTGCGTTCTTCATCGATGC
maize_rhizosphere_m_WT03	f	runBE10	T	GGTAG	F15	AGAACCAG	ITS1F	CTTGGTCATTTAGAGGAAGTAA	R1	TCTTCGAC	ITS2	GCTGCGTTCTTCATCGATGC
maize_rhizosphere_m_bx04	f	runBE10	T	GGTAG	F2	CAACACAG	ITS1F	CTTGGTCATTTAGAGGAAGTAA	R4	GGTACTTC	ITS2	GCTGCGTTCTTCATCGATGC
maize_rhizosphere_m_WT04	f	runBE10	T	GGTAG	F7	AAGACGAG	ITS1F	CTTGGTCATTTAGAGGAAGTAA	R1	TCTTCGAC	ITS2	GCTGCGTTCTTCATCGATGC
maize_rhizosphere_m_bx07	f	runBE10	T	GGTAG	F7	AAGACGAG	ITS1F	CTTGGTCATTTAGAGGAAGTAA	R8	CGTCTTCA	ITS2	GCTGCGTTCTTCATCGATGC
maize_rhizosphere_m_WT07	f	runBE10	T	GGTAG	F4	TAACGTCG	ITS1F	CTTGGTCATTTAGAGGAAGTAA	R7	CTGTATGC	ITS2	GCTGCGTTCTTCATCGATGC
maize_rhizosphere_m_bx09	f	runBE10	T	GGTAG	F9	GTATCGAG	ITS1F	CTTGGTCATTTAGAGGAAGTAA	R6	GATCTCAG	ITS2	GCTGCGTTCTTCATCGATGC
maize_rhizosphere_m_WT09	f	runBE10	T	GGTAG	F16	ATCCTTCC	ITS1F	CTTGGTCATTTAGAGGAAGTAA	R2	TATGCGGT	ITS2	GCTGCGTTCTTCATCGATGC
maize_rhizosphere_m_bx10	f	runBE10	T	GGTAG	F4	TAACGTCG	ITS1F	CTTGGTCATTTAGAGGAAGTAA	R4	GGTACTTC	ITS2	GCTGCGTTCTTCATCGATGC
maize_rhizosphere_m_WT10	f	runBE10	T	GGTAG	F8	CCTACCTA	ITS1F	CTTGGTCATTTAGAGGAAGTAA	R8	CGTCTTCA	ITS2	GCTGCGTTCTTCATCGATGC
maize_root_m_bx01	f	runBE10	T	GGTAG	F6	CCACATTG	ITS1F	CTTGGTCATTTAGAGGAAGTAA	R2	TATGCGGT	ITS2	GCTGCGTTCTTCATCGATGC
maize_root_m_WT01	f	runBE10	T	GGTAG	F3	GCCAATAC	ITS1F	CTTGGTCATTTAGAGGAAGTAA	R8	CGTCTTCA	ITS2	GCTGCGTTCTTCATCGATGC
maize_root_m_bx04	f	runBE10	T	GGTAG	F1	ACAACAGC	ITS1F	CTTGGTCATTTAGAGGAAGTAA	R10	CATGAGCA	ITS2	GCTGCGTTCTTCATCGATGC
maize_root_m_WT04	f	runBE10	T	GGTAG	F8	CCTACCTA	ITS1F	CTTGGTCATTTAGAGGAAGTAA	R7	CTGTATGC	ITS2	GCTGCGTTCTTCATCGATGC
maize_root_m_bx06	f	runBE10	T	GGTAG	F12	TGTCACAC	ITS1F	CTTGGTCATTTAGAGGAAGTAA	R2	TATGCGGT	ITS2	GCTGCGTTCTTCATCGATGC
maize_root_m_WT06	f	runBE10	T	GGTAG	F13	AGTTGTGC	ITS1F	CTTGGTCATTTAGAGGAAGTAA	R3	GTGATCCA	ITS2	GCTGCGTTCTTCATCGATGC
maize_root_m_bx07	f	runBE10	T	GGTAG	F2	CAACACAG	ITS1F	CTTGGTCATTTAGAGGAAGTAA	R1	TCTTCGAC	ITS2	GCTGCGTTCTTCATCGATGC
maize_root_m_WT07	f	runBE10	T	GGTAG	F4	TAACGTCG	ITS1F	CTTGGTCATTTAGAGGAAGTAA	R1	TCTTCGAC	ITS2	GCTGCGTTCTTCATCGATGC
maize_root_m_bx10	f	runBE10	T	GGTAG	F5	AACAACCG	ITS1F	CTTGGTCATTTAGAGGAAGTAA	R8	CGTCTTCA	ITS2	GCTGCGTTCTTCATCGATGC
maize_root_m_WT10	f	runBE10	T	GGTAG	F8	CCTACCTA	ITS1F	CTTGGTCATTTAGAGGAAGTAA	R1	TCTTCGAC	ITS2	GCTGCGTTCTTCATCGATGC
maize_soil_m_bx01	f	runBE10	T	GGTAG	F6	CCACATTG	ITS1F	CTTGGTCATTTAGAGGAAGTAA	R5	GCTTCACA	ITS2	GCTGCGTTCTTCATCGATGC
maize_soil_m_WT01	f	runBE10	T	GGTAG	F6	CCACATTG	ITS1F	CTTGGTCATTTAGAGGAAGTAA	R7	CTGTATGC	ITS2	GCTGCGTTCTTCATCGATGC
maize_soil_m_bx03	f	runBE10	T	GGTAG	F11	TTCGGCTA	ITS1F	CTTGGTCATTTAGAGGAAGTAA	R2	TATGCGGT	ITS2	GCTGCGTTCTTCATCGATGC
maize_soil_m_WT03	f	runBE10	T	GGTAG	F16	ATCCTTCC	ITS1F	CTTGGTCATTTAGAGGAAGTAA	R1	TCTTCGAC	ITS2	GCTGCGTTCTTCATCGATGC
maize_soil_m_bx04	f	runBE10	T	GGTAG	F7	AAGACGAG	ITS1F	CTTGGTCATTTAGAGGAAGTAA	R5	GCTTCACA	ITS2	GCTGCGTTCTTCATCGATGC
maize_soil_m_WT04	f	runBE10	T	GGTAG	F6	CCACATTG	ITS1F	CTTGGTCATTTAGAGGAAGTAA	R9	CCTTGGAA	ITS2	GCTGCGTTCTTCATCGATGC
maize_soil_m_bx07	f	runBE10	T	GGTAG	F7	AAGACGAG	ITS1F	CTTGGTCATTTAGAGGAAGTAA	R3	GTGATCCA	ITS2	GCTGCGTTCTTCATCGATGC
maize_soil_m_WT07	f	runBE10	T	GGTAG	F1	ACAACAGC	ITS1F	CTTGGTCATTTAGAGGAAGTAA	R8	CGTCTTCA	ITS2	GCTGCGTTCTTCATCGATGC
maize_soil_m_bx09	f	runBE10	T	GGTAG	F13	AGTTGTGC	ITS1F	CTTGGTCATTTAGAGGAAGTAA	R5	GCTTCACA	ITS2	GCTGCGTTCTTCATCGATGC
maize_soil_m_WT09	f	runBE10	T	GGTAG	F12	TGTCACAC	ITS1F	CTTGGTCATTTAGAGGAAGTAA	R5	GCTTCACA	ITS2	GCTGCGTTCTTCATCGATGC
maize_soil_m_bx10	f	runBE10	T	GGTAG	F3	GCCAATAC	ITS1F	CTTGGTCATTTAGAGGAAGTAA	R7	CTGTATGC	ITS2	GCTGCGTTCTTCATCGATGC
maize_soil_m_WT10	f	runBE10	T	GGTAG	F4	TAACGTCG	ITS1F	CTTGGTCATTTAGAGGAAGTAA	R9	CCTTGGAA	ITS2	GCTGCGTTCTTCATCGATGC
wheat_soil_bx01	f	runBE10	T	GGTAG	F3	GCCAATAC	ITS1F	CTTGGTCATTTAGAGGAAGTAA	R4	GGTACTTC	ITS2	GCTGCGTTCTTCATCGATGC
wheat_soil_WT01	f	runBE10	T	GGTAG	F6	CCACATTG	ITS1F	CTTGGTCATTTAGAGGAAGTAA	R3	GTGATCCA	ITS2	GCTGCGTTCTTCATCGATGC
wheat_soil_bx04	f	runBE10	T	GGTAG	F3	GCCAATAC	ITS1F	CTTGGTCATTTAGAGGAAGTAA	R10	CATGAGCA	ITS2	GCTGCGTTCTTCATCGATGC
wheat_soil_WT04	f	runBE10	T	GGTAG	F3	GCCAATAC	ITS1F	CTTGGTCATTTAGAGGAAGTAA	R2	TATGCGGT	ITS2	GCTGCGTTCTTCATCGATGC
wheat_soil_bx06	f	runBE10	T	GGTAG	F11	TTCGGCTA	ITS1F	CTTGGTCATTTAGAGGAAGTAA	R1	TCTTCGAC	ITS2	GCTGCGTTCTTCATCGATGC
wheat_soil_WT06	f	runBE10	T	GGTAG	F14	ACAGGCAT	ITS1F	CTTGGTCATTTAGAGGAAGTAA	R3	GTGATCCA	ITS2	GCTGCGTTCTTCATCGATGC
wheat_soil_bx07	f	runBE10	T	GGTAG	F6	CCACATTG	ITS1F	CTTGGTCATTTAGAGGAAGTAA	R8	CGTCTTCA	ITS2	GCTGCGTTCTTCATCGATGC
wheat_soil_WT07	f	runBE10	T	GGTAG	F1	ACAACAGC	ITS1F	CTTGGTCATTTAGAGGAAGTAA	R4	GGTACTTC	ITS2	GCTGCGTTCTTCATCGATGC
wheat_soil_bx10	f	runBE10	T	GGTAG	F1	ACAACAGC	ITS1F	CTTGGTCATTTAGAGGAAGTAA	R5	GCTTCACA	ITS2	GCTGCGTTCTTCATCGATGC
wheat_soil_WT10	f	runBE10	T	GGTAG	F6	CCACATTG	ITS1F	CTTGGTCATTTAGAGGAAGTAA	R11	TTCCAGGT	ITS2	GCTGCGTTCTTCATCGATGC
wheat_soil_bx12	f	runBE10	T	GGTAG	F10	TCGATGAC	ITS1F	CTTGGTCATTTAGAGGAAGTAA	R3	GTGATCCA	ITS2	GCTGCGTTCTTCATCGATGC
wheat_soil_WT12	f	runBE10	T	GGTAG	F16	ATCCTTCC	ITS1F	CTTGGTCATTTAGAGGAAGTAA	R5	GCTTCACA	ITS2	GCTGCGTTCTTCATCGATGC
wheat_soil_bx13	f	runBE10	T	GGTAG	F3	GCCAATAC	ITS1F	CTTGGTCATTTAGAGGAAGTAA	R6	GATCTCAG	ITS2	GCTGCGTTCTTCATCGATGC
wheat_soil_WT13	f	runBE10	T	GGTAG	F7	AAGACGAG	ITS1F	CTTGGTCATTTAGAGGAAGTAA	R6	GATCTCAG	ITS2	GCTGCGTTCTTCATCGATGC
wheat_soil_bx16	f	runBE10	T	GGTAG	F5	AACAACCG	ITS1F	CTTGGTCATTTAGAGGAAGTAA	R10	CATGAGCA	ITS2	GCTGCGTTCTTCATCGATGC
wheat_soil_WT16	f	runBE10	T	GGTAG	F2	CAACACAG	ITS1F	CTTGGTCATTTAGAGGAAGTAA	R3	GTGATCCA	ITS2	GCTGCGTTCTTCATCGATGC
wheat_soil_bx18	f	runBE10	T	GGTAG	F9	GTATCGAG	ITS1F	CTTGGTCATTTAGAGGAAGTAA	R3	GTGATCCA	ITS2	GCTGCGTTCTTCATCGATGC
wheat_soil_WT18	f	runBE10	T	GGTAG	F14	ACAGGCAT	ITS1F	CTTGGTCATTTAGAGGAAGTAA	R2	TATGCGGT	ITS2	GCTGCGTTCTTCATCGATGC
wheat_soil_bx19	f	runBE10	T	GGTAG	F3	GCCAATAC	ITS1F	CTTGGTCATTTAGAGGAAGTAA	R9	CCTTGGAA	ITS2	GCTGCGTTCTTCATCGATGC
wheat_soil_WT19	f	runBE10	T	GGTAG	F8	CCTACCTA	ITS1F	CTTGGTCATTTAGAGGAAGTAA	R4	GGTACTTC	ITS2	GCTGCGTTCTTCATCGATGC
wheat_soil_bx22	f	runBE10	T	GGTAG	F7	AAGACGAG	ITS1F	CTTGGTCATTTAGAGGAAGTAA	R2	TATGCGGT	ITS2	GCTGCGTTCTTCATCGATGC
wheat_soil_WT22	f	runBE10	T	GGTAG	F5	AACAACCG	ITS1F	CTTGGTCATTTAGAGGAAGTAA	R5	GCTTCACA	ITS2	GCTGCGTTCTTCATCGATGC
wheat_soil_bx24	f	runBE10	T	GGTAG	F10	TCGATGAC	ITS1F	CTTGGTCATTTAGAGGAAGTAA	R2	TATGCGGT	ITS2	GCTGCGTTCTTCATCGATGC
wheat_soil_WT24	f	runBE10	T	GGTAG	F13	AGTTGTGC	ITS1F	CTTGGTCATTTAGAGGAAGTAA	R2	TATGCGGT	ITS2	GCTGCGTTCTTCATCGATGC
wheat_soil_bx25	f	runBE10	T	GGTAG	F1	ACAACAGC	ITS1F	CTTGGTCATTTAGAGGAAGTAA	R7	CTGTATGC	ITS2	GCTGCGTTCTTCATCGATGC
wheat_soil_WT25	f	runBE10	T	GGTAG	F2	CAACACAG	ITS1F	CTTGGTCATTTAGAGGAAGTAA	R9	CCTTGGAA	ITS2	GCTGCGTTCTTCATCGATGC
wheat_soil_bx28	f	runBE10	T	GGTAG	F1	ACAACAGC	ITS1F	CTTGGTCATTTAGAGGAAGTAA	R1	TCTTCGAC	ITS2	GCTGCGTTCTTCATCGATGC
wheat_soil_WT28	f	runBE10	T	GGTAG	F7	AAGACGAG	ITS1F	CTTGGTCATTTAGAGGAAGTAA	R7	CTGTATGC	ITS2	GCTGCGTTCTTCATCGATGC
wheat_soil_bx30	f	runBE10	T	GGTAG	F14	ACAGGCAT	ITS1F	CTTGGTCATTTAGAGGAAGTAA	R1	TCTTCGAC	ITS2	GCTGCGTTCTTCATCGATGC
wheat_soil_WT30	f	runBE10	T	GGTAG	F14	ACAGGCAT	ITS1F	CTTGGTCATTTAGAGGAAGTAA	R4	GGTACTTC	ITS2	GCTGCGTTCTTCATCGATGC
wheat_rhizosphere_bx01	f	runBE10	T	GGTAG	F1	ACAACAGC	ITS1F	CTTGGTCATTTAGAGGAAGTAA	R3	GTGATCCA	ITS2	GCTGCGTTCTTCATCGATGC
wheat_rhizosphere_WT01	f	runBE10	T	GGTAG	F4	TAACGTCG	ITS1F	CTTGGTCATTTAGAGGAAGTAA	R8	CGTCTTCA	ITS2	GCTGCGTTCTTCATCGATGC
wheat_rhizosphere_bx04	f	runBE10	T	GGTAG	F8	CCTACCTA	ITS1F	CTTGGTCATTTAGAGGAAGTAA	R2	TATGCGGT	ITS2	GCTGCGTTCTTCATCGATGC
wheat_rhizosphere_WT04	f	runBE10	T	GGTAG	F2	CAACACAG	ITS1F	CTTGGTCATTTAGAGGAAGTAA	R8	CGTCTTCA	ITS2	GCTGCGTTCTTCATCGATGC
wheat_rhizosphere_bx06	f	runBE10	T	GGTAG	F9	GTATCGAG	ITS1F	CTTGGTCATTTAGAGGAAGTAA	R2	TATGCGGT	ITS2	GCTGCGTTCTTCATCGATGC
wheat_rhizosphere_WT06	f	runBE10	T	GGTAG	F15	AGAACCAG	ITS1F	CTTGGTCATTTAGAGGAAGTAA	R3	GTGATCCA	ITS2	GCTGCGTTCTTCATCGATGC
wheat_rhizosphere_bx07	f	runBE10	T	GGTAG	F7	AAGACGAG	ITS1F	CTTGGTCATTTAGAGGAAGTAA	R4	GGTACTTC	ITS2	GCTGCGTTCTTCATCGATGC
wheat_rhizosphere_WT07	f	runBE10	T	GGTAG	F5	AACAACCG	ITS1F	CTTGGTCATTTAGAGGAAGTAA	R9	CCTTGGAA	ITS2	GCTGCGTTCTTCATCGATGC
wheat_rhizosphere_bx10	f	runBE10	T	GGTAG	F1	ACAACAGC	ITS1F	CTTGGTCATTTAGAGGAAGTAA	R6	GATCTCAG	ITS2	GCTGCGTTCTTCATCGATGC
wheat_rhizosphere_WT10	f	runBE10	T	GGTAG	F4	TAACGTCG	ITS1F	CTTGGTCATTTAGAGGAAGTAA	R5	GCTTCACA	ITS2	GCTGCGTTCTTCATCGATGC
wheat_rhizosphere_bx12	f	runBE10	T	GGTAG	F16	ATCCTTCC	ITS1F	CTTGGTCATTTAGAGGAAGTAA	R3	GTGATCCA	ITS2	GCTGCGTTCTTCATCGATGC
wheat_rhizosphere_WT12	f	runBE10	T	GGTAG	F9	GTATCGAG	ITS1F	CTTGGTCATTTAGAGGAAGTAA	R1	TCTTCGAC	ITS2	GCTGCGTTCTTCATCGATGC
wheat_rhizosphere_bx13	f	runBE10	T	GGTAG	F2	CAACACAG	ITS1F	CTTGGTCATTTAGAGGAAGTAA	R2	TATGCGGT	ITS2	GCTGCGTTCTTCATCGATGC
wheat_rhizosphere_WT13	f	runBE10	T	GGTAG	F7	AAGACGAG	ITS1F	CTTGGTCATTTAGAGGAAGTAA	R9	CCTTGGAA	ITS2	GCTGCGTTCTTCATCGATGC
wheat_rhizosphere_bx16	f	runBE10	T	GGTAG	F4	TAACGTCG	ITS1F	CTTGGTCATTTAGAGGAAGTAA	R10	CATGAGCA	ITS2	GCTGCGTTCTTCATCGATGC
wheat_rhizosphere_WT16	f	runBE10	T	GGTAG	F1	ACAACAGC	ITS1F	CTTGGTCATTTAGAGGAAGTAA	R11	TTCCAGGT	ITS2	GCTGCGTTCTTCATCGATGC
wheat_rhizosphere_bx18	f	runBE10	T	GGTAG	F10	TCGATGAC	ITS1F	CTTGGTCATTTAGAGGAAGTAA	R1	TCTTCGAC	ITS2	GCTGCGTTCTTCATCGATGC
wheat_rhizosphere_WT18	f	runBE10	T	GGTAG	F9	GTATCGAG	ITS1F	CTTGGTCATTTAGAGGAAGTAA	R4	GGTACTTC	ITS2	GCTGCGTTCTTCATCGATGC
wheat_rhizosphere_bx19	f	runBE10	T	GGTAG	F5	AACAACCG	ITS1F	CTTGGTCATTTAGAGGAAGTAA	R6	GATCTCAG	ITS2	GCTGCGTTCTTCATCGATGC
wheat_rhizosphere_WT19	f	runBE10	T	GGTAG	F1	ACAACAGC	ITS1F	CTTGGTCATTTAGAGGAAGTAA	R9	CCTTGGAA	ITS2	GCTGCGTTCTTCATCGATGC
wheat_rhizosphere_bx22	f	runBE10	T	GGTAG	F4	TAACGTCG	ITS1F	CTTGGTCATTTAGAGGAAGTAA	R3	GTGATCCA	ITS2	GCTGCGTTCTTCATCGATGC
wheat_rhizosphere_WT22	f	runBE10	T	GGTAG	F3	GCCAATAC	ITS1F	CTTGGTCATTTAGAGGAAGTAA	R3	GTGATCCA	ITS2	GCTGCGTTCTTCATCGATGC
wheat_rhizosphere_bx24	f	runBE10	T	GGTAG	F16	ATCCTTCC	ITS1F	CTTGGTCATTTAGAGGAAGTAA	R4	GGTACTTC	ITS2	GCTGCGTTCTTCATCGATGC
wheat_rhizosphere_WT24	f	runBE10	T	GGTAG	F14	ACAGGCAT	ITS1F	CTTGGTCATTTAGAGGAAGTAA	R5	GCTTCACA	ITS2	GCTGCGTTCTTCATCGATGC
wheat_rhizosphere_bx25	f	runBE10	T	GGTAG	F8	CCTACCTA	ITS1F	CTTGGTCATTTAGAGGAAGTAA	R5	GCTTCACA	ITS2	GCTGCGTTCTTCATCGATGC
wheat_rhizosphere_WT25	f	runBE10	T	GGTAG	F8	CCTACCTA	ITS1F	CTTGGTCATTTAGAGGAAGTAA	R9	CCTTGGAA	ITS2	GCTGCGTTCTTCATCGATGC
wheat_rhizosphere_bx28	f	runBE10	T	GGTAG	F2	CAACACAG	ITS1F	CTTGGTCATTTAGAGGAAGTAA	R10	CATGAGCA	ITS2	GCTGCGTTCTTCATCGATGC
wheat_rhizosphere_WT28	f	runBE10	T	GGTAG	F2	CAACACAG	ITS1F	CTTGGTCATTTAGAGGAAGTAA	R6	GATCTCAG	ITS2	GCTGCGTTCTTCATCGATGC
wheat_rhizosphere_bx30	f	runBE10	T	GGTAG	F11	TTCGGCTA	ITS1F	CTTGGTCATTTAGAGGAAGTAA	R5	GCTTCACA	ITS2	GCTGCGTTCTTCATCGATGC
wheat_rhizosphere_WT30	f	runBE10	T	GGTAG	F15	AGAACCAG	ITS1F	CTTGGTCATTTAGAGGAAGTAA	R2	TATGCGGT	ITS2	GCTGCGTTCTTCATCGATGC
wheat_root_bx01	f	runBE10	T	GGTAG	F4	TAACGTCG	ITS1F	CTTGGTCATTTAGAGGAAGTAA	R6	GATCTCAG	ITS2	GCTGCGTTCTTCATCGATGC
wheat_root_WT01	f	runBE10	T	GGTAG	F8	CCTACCTA	ITS1F	CTTGGTCATTTAGAGGAAGTAA	R3	GTGATCCA	ITS2	GCTGCGTTCTTCATCGATGC
wheat_root_bx04	f	runBE10	T	GGTAG	F4	TAACGTCG	ITS1F	CTTGGTCATTTAGAGGAAGTAA	R11	TTCCAGGT	ITS2	GCTGCGTTCTTCATCGATGC
wheat_root_WT04	f	runBE10	T	GGTAG	F3	GCCAATAC	ITS1F	CTTGGTCATTTAGAGGAAGTAA	R11	TTCCAGGT	ITS2	GCTGCGTTCTTCATCGATGC
wheat_root_bx06	f	runBE10	T	GGTAG	F15	AGAACCAG	ITS1F	CTTGGTCATTTAGAGGAAGTAA	R5	GCTTCACA	ITS2	GCTGCGTTCTTCATCGATGC
wheat_root_WT06	f	runBE10	T	GGTAG	F13	AGTTGTGC	ITS1F	CTTGGTCATTTAGAGGAAGTAA	R4	GGTACTTC	ITS2	GCTGCGTTCTTCATCGATGC
wheat_root_bx07	f	runBE10	T	GGTAG	F3	GCCAATAC	ITS1F	CTTGGTCATTTAGAGGAAGTAA	R1	TCTTCGAC	ITS2	GCTGCGTTCTTCATCGATGC
wheat_root_WT07	f	runBE10	T	GGTAG	F3	GCCAATAC	ITS1F	CTTGGTCATTTAGAGGAAGTAA	R5	GCTTCACA	ITS2	GCTGCGTTCTTCATCGATGC
wheat_root_bx10	f	runBE10	T	GGTAG	F5	AACAACCG	ITS1F	CTTGGTCATTTAGAGGAAGTAA	R4	GGTACTTC	ITS2	GCTGCGTTCTTCATCGATGC
wheat_root_WT10	f	runBE10	T	GGTAG	F5	AACAACCG	ITS1F	CTTGGTCATTTAGAGGAAGTAA	R3	GTGATCCA	ITS2	GCTGCGTTCTTCATCGATGC
wheat_root_bx12	f	runBE10	T	GGTAG	F9	GTATCGAG	ITS1F	CTTGGTCATTTAGAGGAAGTAA	R5	GCTTCACA	ITS2	GCTGCGTTCTTCATCGATGC
wheat_root_WT12	f	runBE10	T	GGTAG	F11	TTCGGCTA	ITS1F	CTTGGTCATTTAGAGGAAGTAA	R3	GTGATCCA	ITS2	GCTGCGTTCTTCATCGATGC
wheat_root_bx13	f	runBE10	T	GGTAG	F2	CAACACAG	ITS1F	CTTGGTCATTTAGAGGAAGTAA	R5	GCTTCACA	ITS2	GCTGCGTTCTTCATCGATGC
wheat_root_WT13	f	runBE10	T	GGTAG	F7	AAGACGAG	ITS1F	CTTGGTCATTTAGAGGAAGTAA	R10	CATGAGCA	ITS2	GCTGCGTTCTTCATCGATGC
wheat_root_bx16	f	runBE10	T	GGTAG	F5	AACAACCG	ITS1F	CTTGGTCATTTAGAGGAAGTAA	R11	TTCCAGGT	ITS2	GCTGCGTTCTTCATCGATGC
wheat_root_WT16	f	runBE10	T	GGTAG	F8	CCTACCTA	ITS1F	CTTGGTCATTTAGAGGAAGTAA	R10	CATGAGCA	ITS2	GCTGCGTTCTTCATCGATGC
wheat_root_bx18	f	runBE10	T	GGTAG	F10	TCGATGAC	ITS1F	CTTGGTCATTTAGAGGAAGTAA	R5	GCTTCACA	ITS2	GCTGCGTTCTTCATCGATGC
wheat_root_WT18	f	runBE10	T	GGTAG	F15	AGAACCAG	ITS1F	CTTGGTCATTTAGAGGAAGTAA	R4	GGTACTTC	ITS2	GCTGCGTTCTTCATCGATGC
wheat_root_bx19	f	runBE10	T	GGTAG	F6	CCACATTG	ITS1F	CTTGGTCATTTAGAGGAAGTAA	R6	GATCTCAG	ITS2	GCTGCGTTCTTCATCGATGC
wheat_root_WT19	f	runBE10	T	GGTAG	F2	CAACACAG	ITS1F	CTTGGTCATTTAGAGGAAGTAA	R11	TTCCAGGT	ITS2	GCTGCGTTCTTCATCGATGC
wheat_root_bx22	f	runBE10	T	GGTAG	F6	CCACATTG	ITS1F	CTTGGTCATTTAGAGGAAGTAA	R1	TCTTCGAC	ITS2	GCTGCGTTCTTCATCGATGC
wheat_root_WT22	f	runBE10	T	GGTAG	F8	CCTACCTA	ITS1F	CTTGGTCATTTAGAGGAAGTAA	R6	GATCTCAG	ITS2	GCTGCGTTCTTCATCGATGC
wheat_root_bx24	f	runBE10	T	GGTAG	F12	TGTCACAC	ITS1F	CTTGGTCATTTAGAGGAAGTAA	R3	GTGATCCA	ITS2	GCTGCGTTCTTCATCGATGC
wheat_root_WT24	f	runBE10	T	GGTAG	F12	TGTCACAC	ITS1F	CTTGGTCATTTAGAGGAAGTAA	R1	TCTTCGAC	ITS2	GCTGCGTTCTTCATCGATGC
wheat_root_bx25	f	runBE10	T	GGTAG	F1	ACAACAGC	ITS1F	CTTGGTCATTTAGAGGAAGTAA	R2	TATGCGGT	ITS2	GCTGCGTTCTTCATCGATGC
wheat_root_WT25	f	runBE10	T	GGTAG	F5	AACAACCG	ITS1F	CTTGGTCATTTAGAGGAAGTAA	R2	TATGCGGT	ITS2	GCTGCGTTCTTCATCGATGC
wheat_root_bx28	f	runBE10	T	GGTAG	F4	TAACGTCG	ITS1F	CTTGGTCATTTAGAGGAAGTAA	R2	TATGCGGT	ITS2	GCTGCGTTCTTCATCGATGC
wheat_root_WT28	f	runBE10	T	GGTAG	F6	CCACATTG	ITS1F	CTTGGTCATTTAGAGGAAGTAA	R4	GGTACTTC	ITS2	GCTGCGTTCTTCATCGATGC
wheat_root_bx30	f	runBE10	T	GGTAG	F13	AGTTGTGC	ITS1F	CTTGGTCATTTAGAGGAAGTAA	R1	TCTTCGAC	ITS2	GCTGCGTTCTTCATCGATGC
wheat_root_WT30	f	runBE10	T	GGTAG	F11	TTCGGCTA	ITS1F	CTTGGTCATTTAGAGGAAGTAA	R4	GGTACTTC	ITS2	GCTGCGTTCTTCATCGATGC
Empty_extraction	f	runBE10	T	GGTAG	F6	CCACATTG	ITS1F	CTTGGTCATTTAGAGGAAGTAA	R10	CATGAGCA	ITS2	GCTGCGTTCTTCATCGATGC
Empty_extraction	f	runBE10	T	GGTAG	F12	TGTCACAC	ITS1F	CTTGGTCATTTAGAGGAAGTAA	R4	GGTACTTC	ITS2	GCTGCGTTCTTCATCGATGC
Empty_extraction	f	runBE10	T	GGTAG	F5	AACAACCG	ITS1F	CTTGGTCATTTAGAGGAAGTAA	R1	TCTTCGAC	ITS2	GCTGCGTTCTTCATCGATGC
PCR_empty_control	f	runBE10	T	GGTAG	F7	AAGACGAG	ITS1F	CTTGGTCATTTAGAGGAAGTAA	R11	TTCCAGGT	ITS2	GCTGCGTTCTTCATCGATGC
PCR_empty_control	f	runBE10	T	GGTAG	F10	TCGATGAC	ITS1F	CTTGGTCATTTAGAGGAAGTAA	R6	GATCTCAG	ITS2	GCTGCGTTCTTCATCGATGC

## Sheet: metadata
SampleID	Run	SampleType	Genotype	Conditioning	Species	Variety	bac_f_bc	bac_r_bc	fun_f_bc	fun_r_bc
maize_rhizosphere_m_bx01	runBE10	rhizosphere	bx1	BX-	maize	W22	F61	R46	F2	R7
maize_rhizosphere_m_WT01	runBE10	rhizosphere	WT	BX+	maize	W22	F64	R46	F5	R7
maize_rhizosphere_m_bx02	runBE09	rhizosphere	bx1	BX-	maize	W22	F72	R49	F13	R10
maize_rhizosphere_m_WT02	runBE09	rhizosphere	WT	BX+	maize	W22	F73	R43	F14	R4
maize_rhizosphere_m_bx03	runBE10	rhizosphere	bx1	BX-	maize	W22	F69	R43	F10	R4
maize_rhizosphere_m_WT03	runBE10	rhizosphere	WT	BX+	maize	W22	F74	R40	F15	R1
maize_rhizosphere_m_bx04	runBE10	rhizosphere	bx1	BX-	maize	W22	F61	R43	F2	R4
maize_rhizosphere_m_WT04	runBE10	rhizosphere	WT	BX+	maize	W22	F66	R40	F7	R1
maize_rhizosphere_m_bx05	runBE09	rhizosphere	bx1	BX-	maize	W22	F72	R42	F13	R3
maize_rhizosphere_m_WT05	runBE09	rhizosphere	WT	BX+	maize	W22	F70	R40	F11	R1
maize_rhizosphere_m_bx06	runBE09	rhizosphere	bx1	BX-	maize	W22	F62	R47	F3	R8
maize_rhizosphere_m_WT06	runBE09	rhizosphere	WT	BX+	maize	W22	F66	R48	F7	R9
maize_rhizosphere_m_bx07	runBE10	rhizosphere	bx1	BX-	maize	W22	F66	R47	F7	R8
maize_rhizosphere_m_WT07	runBE10	rhizosphere	WT	BX+	maize	W22	F63	R46	F4	R7
maize_rhizosphere_m_bx08	runBE09	rhizosphere	bx1	BX-	maize	W22	F69	R40	F10	R1
maize_rhizosphere_m_WT08	runBE09	rhizosphere	WT	BX+	maize	W22	F69	R46	F10	R7
maize_rhizosphere_m_bx09	runBE10	rhizosphere	bx1	BX-	maize	W22	F68	R45	F9	R6
maize_rhizosphere_m_WT09	runBE10	rhizosphere	WT	BX+	maize	W22	F75	R41	F16	R2
maize_rhizosphere_m_bx10	runBE10	rhizosphere	bx1	BX-	maize	W22	F63	R43	F4	R4
maize_rhizosphere_m_WT10	runBE10	rhizosphere	WT	BX+	maize	W22	F67	R47	F8	R8
maize_root_m_bx01	runBE10	root	bx1	BX-	maize	W22	F65	R41	F6	R2
maize_root_m_WT01	runBE10	root	WT	BX+	maize	W22	F62	R47	F3	R8
maize_root_m_bx02	runBE09	root	bx1	BX-	maize	W22	F73	R40	F14	R1
maize_root_m_WT02	runBE09	root	WT	BX+	maize	W22	F70	R47	F11	R8
maize_root_m_bx03	runBE09	root	bx1	BX-	maize	W22	F62	R49	F3	R10
maize_root_m_WT03	runBE09	root	WT	BX+	maize	W22	F64	R48	F5	R9
maize_root_m_bx04	runBE10	root	bx1	BX-	maize	W22	F60	R49	F1	R10
maize_root_m_WT04	runBE10	root	WT	BX+	maize	W22	F67	R46	F8	R7
maize_root_m_bx05	runBE09	root	bx1	BX-	maize	W22	F69	R45	F10	R6
maize_root_m_WT05	runBE09	root	WT	BX+	maize	W22	F71	R40	F12	R1
maize_root_m_bx06	runBE10	root	bx1	BX-	maize	W22	F71	R41	F12	R2
maize_root_m_WT06	runBE10	root	WT	BX+	maize	W22	F72	R42	F13	R3
maize_root_m_bx07	runBE10	root	bx1	BX-	maize	W22	F61	R40	F2	R1
maize_root_m_WT07	runBE10	root	WT	BX+	maize	W22	F63	R40	F4	R1
maize_root_m_bx08	runBE09	root	bx1	BX-	maize	W22	F75	R40	F16	R1
maize_root_m_WT08	runBE09	root	WT	BX+	maize	W22	F70	R44	F11	R5
maize_root_m_bx09	runBE09	root	bx1	BX-	maize	W22	F62	R48	F3	R9
maize_root_m_WT09	runBE09	root	WT	BX+	maize	W22	F64	R49	F5	R10
maize_root_m_bx10	runBE10	root	bx1	BX-	maize	W22	F64	R47	F5	R8
maize_root_m_WT10	runBE10	root	WT	BX+	maize	W22	F67	R40	F8	R1
maize_soil_m_bx01	runBE10	soil	bx1	BX-	maize	W22	F65	R44	F6	R5
maize_soil_m_WT01	runBE10	soil	WT	BX+	maize	W22	F65	R46	F6	R7
maize_soil_m_bx02	runBE09	soil	bx1	BX-	maize	W22	F71	R47	F12	R8
maize_soil_m_WT02	runBE09	soil	WT	BX+	maize	W22	F74	R44	F15	R5
maize_soil_m_bx03	runBE10	soil	bx1	BX-	maize	W22	F70	R41	F11	R2
maize_soil_m_WT03	runBE10	soil	WT	BX+	maize	W22	F75	R40	F16	R1
maize_soil_m_bx04	runBE10	soil	bx1	BX-	maize	W22	F66	R44	F7	R5
maize_soil_m_WT04	runBE10	soil	WT	BX+	maize	W22	F65	R48	F6	R9
maize_soil_m_bx05	runBE09	soil	bx1	BX-	maize	W22	F74	R48	F15	R9
maize_soil_m_WT05	runBE09	soil	WT	BX+	maize	W22	F71	R41	F12	R2
maize_soil_m_bx06	runBE09	soil	bx1	BX-	maize	W22	F60	R50	F1	R11
maize_soil_m_WT06	runBE09	soil	WT	BX+	maize	W22	F67	R48	F8	R9
maize_soil_m_bx07	runBE10	soil	bx1	BX-	maize	W22	F66	R42	F7	R3
maize_soil_m_WT07	runBE10	soil	WT	BX+	maize	W22	F60	R47	F1	R8
maize_soil_m_bx08	runBE09	soil	bx1	BX-	maize	W22	F71	R43	F12	R4
maize_soil_m_WT08	runBE09	soil	WT	BX+	maize	W22	F73	R44	F14	R5
maize_soil_m_bx09	runBE10	soil	bx1	BX-	maize	W22	F72	R44	F13	R5
maize_soil_m_WT09	runBE10	soil	WT	BX+	maize	W22	F71	R44	F12	R5
maize_soil_m_bx10	runBE10	soil	bx1	BX-	maize	W22	F62	R46	F3	R7
maize_soil_m_WT10	runBE10	soil	WT	BX+	maize	W22	F63	R48	F4	R9
wheat_soil_bx01	runBE10	soil	bx1	BX-	wheat	fiorina	F62	R43	F3	R4
wheat_soil_WT01	runBE10	soil	WT	BX+	wheat	fiorina	F65	R42	F6	R3
wheat_soil_bx02	runBE09	soil	bx1	BX-	wheat	fiorina	F74	R43	F15	R4
wheat_soil_WT02	runBE09	soil	WT	BX+	wheat	fiorina	F73	R45	F14	R6
wheat_soil_bx03	runBE09	soil	bx1	BX-	wheat	fiorina	F65	R49	F6	R10
wheat_soil_WT03	runBE09	soil	WT	BX+	wheat	fiorina	F61	R47	F2	R8
wheat_soil_bx04	runBE10	soil	bx1	BX-	wheat	fiorina	F62	R49	F3	R10
wheat_soil_WT04	runBE10	soil	WT	BX+	wheat	fiorina	F62	R41	F3	R2
wheat_soil_bx05	runBE09	soil	bx1	BX-	wheat	fiorina	F74	R46	F15	R7
wheat_soil_WT05	runBE09	soil	WT	BX+	wheat	fiorina	F75	R47	F16	R8
wheat_soil_bx06	runBE10	soil	bx1	BX-	wheat	claro	F70	R40	F11	R1
wheat_soil_WT06	runBE10	soil	WT	BX+	wheat	claro	F73	R42	F14	R3
wheat_soil_bx07	runBE10	soil	bx1	BX-	wheat	claro	F65	R47	F6	R8
wheat_soil_WT07	runBE10	soil	WT	BX+	wheat	claro	F60	R43	F1	R4
wheat_soil_bx08	runBE09	soil	bx1	BX-	wheat	claro	F73	R49	F14	R10
wheat_soil_WT08	runBE09	soil	WT	BX+	wheat	claro	F75	R41	F16	R2
wheat_soil_bx09	runBE09	soil	bx1	BX-	wheat	claro	F66	R49	F7	R10
wheat_soil_WT09	runBE09	soil	WT	BX+	wheat	claro	F66	R46	F7	R7
wheat_soil_bx10	runBE10	soil	bx1	BX-	wheat	claro	F60	R44	F1	R5
wheat_soil_WT10	runBE10	soil	WT	BX+	wheat	claro	F65	R50	F6	R11
wheat_soil_bx11	runBE09	soil	bx1	BX-	wheat	fiorina	F71	R49	F12	R10
wheat_soil_WT11	runBE09	soil	WT	BX+	wheat	fiorina	F68	R49	F9	R10
wheat_soil_bx12	runBE10	soil	bx1	BX-	wheat	fiorina	F69	R42	F10	R3
wheat_soil_WT12	runBE10	soil	WT	BX+	wheat	fiorina	F75	R44	F16	R5
wheat_soil_bx13	runBE10	soil	bx1	BX-	wheat	fiorina	F62	R45	F3	R6
wheat_soil_WT13	runBE10	soil	WT	BX+	wheat	fiorina	F66	R45	F7	R6
wheat_soil_bx14	runBE09	soil	bx1	BX-	wheat	fiorina	F75	R45	F16	R6
wheat_soil_WT14	runBE09	soil	WT	BX+	wheat	fiorina	F72	R44	F13	R5
wheat_soil_bx15	runBE09	soil	bx1	BX-	wheat	fiorina	F67	R47	F8	R8
wheat_soil_WT15	runBE09	soil	WT	BX+	wheat	fiorina	F65	R48	F6	R9
wheat_soil_bx16	runBE10	soil	bx1	BX-	wheat	claro	F64	R49	F5	R10
wheat_soil_WT16	runBE10	soil	WT	BX+	wheat	claro	F61	R42	F2	R3
wheat_soil_bx17	runBE09	soil	bx1	BX-	wheat	claro	F69	R49	F10	R10
wheat_soil_WT17	runBE09	soil	WT	BX+	wheat	claro	F68	R47	F9	R8
wheat_soil_bx18	runBE10	soil	bx1	BX-	wheat	claro	F68	R42	F9	R3
wheat_soil_WT18	runBE10	soil	WT	BX+	wheat	claro	F73	R41	F14	R2
wheat_soil_bx19	runBE10	soil	bx1	BX-	wheat	claro	F62	R48	F3	R9
wheat_soil_WT19	runBE10	soil	WT	BX+	wheat	claro	F67	R43	F8	R4
wheat_soil_bx20	runBE09	soil	bx1	BX-	wheat	claro	F70	R48	F11	R9
wheat_soil_WT20	runBE09	soil	WT	BX+	wheat	claro	F74	R41	F15	R2
wheat_soil_bx21	runBE09	soil	bx1	BX-	wheat	sailor	F62	R46	F3	R7
wheat_soil_WT21	runBE09	soil	WT	BX+	wheat	sailor	F60	R47	F1	R8
wheat_soil_bx22	runBE10	soil	bx1	BX-	wheat	sailor	F66	R41	F7	R2
wheat_soil_WT22	runBE10	soil	WT	BX+	wheat	sailor	F64	R44	F5	R5
wheat_soil_bx23	runBE09	soil	bx1	BX-	wheat	sailor	F75	R42	F16	R3
wheat_soil_WT23	runBE09	soil	WT	BX+	wheat	sailor	F69	R47	F10	R8
wheat_soil_bx24	runBE10	soil	bx1	BX-	wheat	sailor	F69	R41	F10	R2
wheat_soil_WT24	runBE10	soil	WT	BX+	wheat	sailor	F72	R41	F13	R2
wheat_soil_bx25	runBE10	soil	bx1	BX-	wheat	sailor	F60	R46	F1	R7
wheat_soil_WT25	runBE10	soil	WT	BX+	wheat	sailor	F61	R48	F2	R9
wheat_soil_bx26	runBE09	soil	bx1	BX-	wheat	sailor	F72	R41	F13	R2
wheat_soil_WT26	runBE09	soil	WT	BX+	wheat	sailor	F74	R45	F15	R6
wheat_soil_bx27	runBE09	soil	bx1	BX-	wheat	sailor	F63	R50	F4	R11
wheat_soil_WT27	runBE09	soil	WT	BX+	wheat	sailor	F64	R50	F5	R11
wheat_soil_bx28	runBE10	soil	bx1	BX-	wheat	sailor	F60	R40	F1	R1
wheat_soil_WT28	runBE10	soil	WT	BX+	wheat	sailor	F66	R46	F7	R7
wheat_soil_bx29	runBE09	soil	bx1	BX-	wheat	sailor	F69	R44	F10	R5
wheat_soil_WT29	runBE09	soil	WT	BX+	wheat	sailor	F70	R49	F11	R10
wheat_soil_bx30	runBE10	soil	bx1	BX-	wheat	sailor	F73	R40	F14	R1
wheat_soil_WT30	runBE10	soil	WT	BX+	wheat	sailor	F73	R43	F14	R4
wheat_rhizosphere_bx01	runBE10	rhizosphere	bx1	BX-	wheat	fiorina	F60	R42	F1	R3
wheat_rhizosphere_WT01	runBE10	rhizosphere	WT	BX+	wheat	fiorina	F63	R47	F4	R8
wheat_rhizosphere_bx02	runBE09	rhizosphere	bx1	BX-	wheat	fiorina	F68	R46	F9	R7
wheat_rhizosphere_WT02	runBE09	rhizosphere	WT	BX+	wheat	fiorina	F75	R46	F16	R7
wheat_rhizosphere_bx03	runBE09	rhizosphere	bx1	BX-	wheat	fiorina	F61	R46	F2	R7
wheat_rhizosphere_WT03	runBE09	rhizosphere	WT	BX+	wheat	fiorina	F60	R48	F1	R9
wheat_rhizosphere_bx04	runBE10	rhizosphere	bx1	BX-	wheat	fiorina	F67	R41	F8	R2
wheat_rhizosphere_WT04	runBE10	rhizosphere	WT	BX+	wheat	fiorina	F61	R47	F2	R8
wheat_rhizosphere_bx05	runBE09	rhizosphere	bx1	BX-	wheat	fiorina	F75	R48	F16	R9
wheat_rhizosphere_WT05	runBE09	rhizosphere	WT	BX+	wheat	fiorina	F69	R41	F10	R2
wheat_rhizosphere_bx06	runBE10	rhizosphere	bx1	BX-	wheat	claro	F68	R41	F9	R2
wheat_rhizosphere_WT06	runBE10	rhizosphere	WT	BX+	wheat	claro	F74	R42	F15	R3
wheat_rhizosphere_bx07	runBE10	rhizosphere	bx1	BX-	wheat	claro	F66	R43	F7	R4
wheat_rhizosphere_WT07	runBE10	rhizosphere	WT	BX+	wheat	claro	F64	R48	F5	R9
wheat_rhizosphere_bx08	runBE09	rhizosphere	bx1	BX-	wheat	claro	F71	R45	F12	R6
wheat_rhizosphere_WT08	runBE09	rhizosphere	WT	BX+	wheat	claro	F74	R49	F15	R10
wheat_rhizosphere_bx09	runBE09	rhizosphere	bx1	BX-	wheat	claro	F66	R47	F7	R8
wheat_rhizosphere_WT09	runBE09	rhizosphere	WT	BX+	wheat	claro	F60	R46	F1	R7
wheat_rhizosphere_bx10	runBE10	rhizosphere	bx1	BX-	wheat	claro	F60	R45	F1	R6
wheat_rhizosphere_WT10	runBE10	rhizosphere	WT	BX+	wheat	claro	F63	R44	F4	R5
wheat_rhizosphere_bx11	runBE09	rhizosphere	bx1	BX-	wheat	fiorina	F75	R49	F16	R10
wheat_rhizosphere_WT11	runBE09	rhizosphere	WT	BX+	wheat	fiorina	F73	R46	F14	R7
wheat_rhizosphere_bx12	runBE10	rhizosphere	bx1	BX-	wheat	fiorina	F75	R42	F16	R3
wheat_rhizosphere_WT12	runBE10	rhizosphere	WT	BX+	wheat	fiorina	F68	R40	F9	R1
wheat_rhizosphere_bx13	runBE10	rhizosphere	bx1	BX-	wheat	fiorina	F61	R41	F2	R2
wheat_rhizosphere_WT13	runBE10	rhizosphere	WT	BX+	wheat	fiorina	F66	R48	F7	R9
wheat_rhizosphere_bx14	runBE09	rhizosphere	bx1	BX-	wheat	fiorina	F75	R43	F16	R4
wheat_rhizosphere_WT14	runBE09	rhizosphere	WT	BX+	wheat	fiorina	F70	R42	F11	R3
wheat_rhizosphere_bx15	runBE09	rhizosphere	bx1	BX-	wheat	fiorina	F63	R47	F4	R8
wheat_rhizosphere_WT15	runBE09	rhizosphere	WT	BX+	wheat	fiorina	F63	R49	F4	R10
wheat_rhizosphere_bx16	runBE10	rhizosphere	bx1	BX-	wheat	claro	F63	R49	F4	R10
wheat_rhizosphere_WT16	runBE10	rhizosphere	WT	BX+	wheat	claro	F60	R50	F1	R11
wheat_rhizosphere_bx17	runBE09	rhizosphere	bx1	BX-	wheat	claro	F72	R40	F13	R1
wheat_rhizosphere_WT17	runBE09	rhizosphere	WT	BX+	wheat	claro	F68	R41	F9	R2
wheat_rhizosphere_bx18	runBE10	rhizosphere	bx1	BX-	wheat	claro	F69	R40	F10	R1
wheat_rhizosphere_WT18	runBE10	rhizosphere	WT	BX+	wheat	claro	F68	R43	F9	R4
wheat_rhizosphere_bx19	runBE10	rhizosphere	bx1	BX-	wheat	claro	F64	R45	F5	R6
wheat_rhizosphere_WT19	runBE10	rhizosphere	WT	BX+	wheat	claro	F60	R48	F1	R9
wheat_rhizosphere_bx20	runBE09	rhizosphere	bx1	BX-	wheat	claro	F72	R48	F13	R9
wheat_rhizosphere_WT20	runBE09	rhizosphere	WT	BX+	wheat	claro	F75	R44	F16	R5
wheat_rhizosphere_bx21	runBE09	rhizosphere	bx1	BX-	wheat	sailor	F61	R50	F2	R11
wheat_rhizosphere_WT21	runBE09	rhizosphere	WT	BX+	wheat	sailor	F63	R48	F4	R9
wheat_rhizosphere_bx22	runBE10	rhizosphere	bx1	BX-	wheat	sailor	F63	R42	F4	R3
wheat_rhizosphere_WT22	runBE10	rhizosphere	WT	BX+	wheat	sailor	F62	R42	F3	R3
wheat_rhizosphere_bx23	runBE09	rhizosphere	bx1	BX-	wheat	sailor	F72	R47	F13	R8
wheat_rhizosphere_WT23	runBE09	rhizosphere	WT	BX+	wheat	sailor	F71	R44	F12	R5
wheat_rhizosphere_bx24	runBE10	rhizosphere	bx1	BX-	wheat	sailor	F75	R43	F16	R4
wheat_rhizosphere_WT24	runBE10	rhizosphere	WT	BX+	wheat	sailor	F73	R44	F14	R5
wheat_rhizosphere_bx25	runBE10	rhizosphere	bx1	BX-	wheat	sailor	F67	R44	F8	R5
wheat_rhizosphere_WT25	runBE10	rhizosphere	WT	BX+	wheat	sailor	F67	R48	F8	R9
wheat_rhizosphere_bx26	runBE09	rhizosphere	bx1	BX-	wheat	sailor	F74	R42	F15	R3
wheat_rhizosphere_WT26	runBE09	rhizosphere	WT	BX+	wheat	sailor	F71	R46	F12	R7
wheat_rhizosphere_bx27	runBE09	rhizosphere	bx1	BX-	wheat	sailor	F66	R50	F7	R11
wheat_rhizosphere_WT27	runBE09	rhizosphere	WT	BX+	wheat	sailor	F62	R50	F3	R11
wheat_rhizosphere_bx28	runBE10	rhizosphere	bx1	BX-	wheat	sailor	F61	R49	F2	R10
wheat_rhizosphere_WT28	runBE10	rhizosphere	WT	BX+	wheat	sailor	F61	R45	F2	R6
wheat_rhizosphere_bx29	runBE09	rhizosphere	bx1	BX-	wheat	sailor	F74	R40	F15	R1
wheat_rhizosphere_WT29	runBE09	rhizosphere	WT	BX+	wheat	sailor	F69	R48	F10	R9
wheat_rhizosphere_bx30	runBE10	rhizosphere	bx1	BX-	wheat	sailor	F70	R44	F11	R5
wheat_rhizosphere_WT30	runBE10	rhizosphere	WT	BX+	wheat	sailor	F74	R41	F15	R2
wheat_root_bx01	runBE10	root	bx1	BX-	wheat	fiorina	F63	R45	F4	R6
wheat_root_WT01	runBE10	root	WT	BX+	wheat	fiorina	F67	R42	F8	R3
wheat_root_bx02	runBE09	root	bx1	BX-	wheat	fiorina	F68	R48	F9	R9
wheat_root_WT02	runBE09	root	WT	BX+	wheat	fiorina	F72	R46	F13	R7
wheat_root_bx03	runBE09	root	bx1	BX-	wheat	fiorina	F63	R46	F4	R7
wheat_root_WT03	runBE09	root	WT	BX+	wheat	fiorina	F64	R47	F5	R8
wheat_root_bx04	runBE10	root	bx1	BX-	wheat	fiorina	F63	R50	F4	R11
wheat_root_WT04	runBE10	root	WT	BX+	wheat	fiorina	F62	R50	F3	R11
wheat_root_bx05	runBE09	root	bx1	BX-	wheat	fiorina	F69	R43	F10	R4
wheat_root_WT05	runBE09	root	WT	BX+	wheat	fiorina	F73	R42	F14	R3
wheat_root_bx06	runBE10	root	bx1	BX-	wheat	claro	F74	R44	F15	R5
wheat_root_WT06	runBE10	root	WT	BX+	wheat	claro	F72	R43	F13	R4
wheat_root_bx07	runBE10	root	bx1	BX-	wheat	claro	F62	R40	F3	R1
wheat_root_WT07	runBE10	root	WT	BX+	wheat	claro	F62	R44	F3	R5
wheat_root_bx08	runBE09	root	bx1	BX-	wheat	claro	F70	R46	F11	R7
wheat_root_WT08	runBE09	root	WT	BX+	wheat	claro	F73	R47	F14	R8
wheat_root_bx09	runBE09	root	bx1	BX-	wheat	claro	F67	R49	F8	R10
wheat_root_WT09	runBE09	root	WT	BX+	wheat	claro	F67	R46	F8	R7
wheat_root_bx10	runBE10	root	bx1	BX-	wheat	claro	F64	R43	F5	R4
wheat_root_WT10	runBE10	root	WT	BX+	wheat	claro	F64	R42	F5	R3
wheat_root_bx11	runBE09	root	bx1	BX-	wheat	fiorina	F70	R45	F11	R6
wheat_root_WT11	runBE09	root	WT	BX+	wheat	fiorina	F74	R47	F15	R8
wheat_root_bx12	runBE10	root	bx1	BX-	wheat	fiorina	F68	R44	F9	R5
wheat_root_WT12	runBE10	root	WT	BX+	wheat	fiorina	F70	R42	F11	R3
wheat_root_bx13	runBE10	root	bx1	BX-	wheat	fiorina	F61	R44	F2	R5
wheat_root_WT13	runBE10	root	WT	BX+	wheat	fiorina	F66	R49	F7	R10
wheat_root_bx14	runBE09	root	bx1	BX-	wheat	fiorina	F73	R41	F14	R2
wheat_root_WT14	runBE09	root	WT	BX+	wheat	fiorina	F71	R42	F12	R3
wheat_root_bx15	runBE09	root	bx1	BX-	wheat	fiorina	F65	R46	F6	R7
wheat_root_WT15	runBE09	root	WT	BX+	wheat	fiorina	F65	R47	F6	R8
wheat_root_bx16	runBE10	root	bx1	BX-	wheat	claro	F64	R50	F5	R11
wheat_root_WT16	runBE10	root	WT	BX+	wheat	claro	F67	R49	F8	R10
wheat_root_bx17	runBE09	root	bx1	BX-	wheat	claro	F72	R43	F13	R4
wheat_root_WT17	runBE09	root	WT	BX+	wheat	claro	F70	R43	F11	R4
wheat_root_bx18	runBE10	root	bx1	BX-	wheat	claro	F69	R44	F10	R5
wheat_root_WT18	runBE10	root	WT	BX+	wheat	claro	F74	R43	F15	R4
wheat_root_bx19	runBE10	root	bx1	BX-	wheat	claro	F65	R45	F6	R6
wheat_root_WT19	runBE10	root	WT	BX+	wheat	claro	F61	R50	F2	R11
wheat_root_bx20	runBE09	root	bx1	BX-	wheat	claro	F71	R48	F12	R9
wheat_root_WT20	runBE09	root	WT	BX+	wheat	claro	F70	R41	F11	R2
wheat_root_bx21	runBE09	root	bx1	BX-	wheat	sailor	F64	R46	F5	R7
wheat_root_WT21	runBE09	root	WT	BX+	wheat	sailor	F60	R49	F1	R10
wheat_root_bx22	runBE10	root	bx1	BX-	wheat	sailor	F65	R40	F6	R1
wheat_root_WT22	runBE10	root	WT	BX+	wheat	sailor	F67	R45	F8	R6
wheat_root_bx23	runBE09	root	bx1	BX-	wheat	sailor	F73	R48	F14	R9
wheat_root_WT23	runBE09	root	WT	BX+	wheat	sailor	F68	R43	F9	R4
wheat_root_bx24	runBE10	root	bx1	BX-	wheat	sailor	F71	R42	F12	R3
wheat_root_WT24	runBE10	root	WT	BX+	wheat	sailor	F71	R40	F12	R1
wheat_root_bx25	runBE10	root	bx1	BX-	wheat	sailor	F60	R41	F1	R2
wheat_root_WT25	runBE10	root	WT	BX+	wheat	sailor	F64	R41	F5	R2
wheat_root_bx26	runBE09	root	bx1	BX-	wheat	sailor	F68	R44	F9	R5
wheat_root_WT26	runBE09	root	WT	BX+	wheat	sailor	F68	R42	F9	R3
wheat_root_bx27	runBE09	root	bx1	BX-	wheat	sailor	F61	R49	F2	R10
wheat_root_WT27	runBE09	root	WT	BX+	wheat	sailor	F65	R50	F6	R11
wheat_root_bx28	runBE10	root	bx1	BX-	wheat	sailor	F63	R41	F4	R2
wheat_root_WT28	runBE10	root	WT	BX+	wheat	sailor	F65	R43	F6	R4
wheat_root_bx29	runBE09	root	bx1	BX-	wheat	sailor	F68	R45	F9	R6
wheat_root_WT29	runBE09	root	WT	BX+	wheat	sailor	F68	R40	F9	R1
wheat_root_bx30	runBE10	root	bx1	BX-	wheat	sailor	F72	R40	F13	R1
wheat_root_WT30	runBE10	root	WT	BX+	wheat	sailor	F70	R43	F11	R4
Empty_extraction	runBE09	#N/A	#N/A	#N/A	#N/A	#N/A	F72	R45	F13	R6
Empty_extraction	runBE09	#N/A	#N/A	#N/A	#N/A	#N/A	F69	R42	F10	R3
Empty_extraction	runBE09	#N/A	#N/A	#N/A	#N/A	#N/A	F61	R48	F2	R9
PCR_empty_control	runBE09	#N/A	#N/A	#N/A	#N/A	#N/A	F68	R50	F9	R11
PCR_empty_control	runBE09	#N/A	#N/A	#N/A	#N/A	#N/A	F67	R50	F8	R11
Empty_extraction	runBE10	#N/A	#N/A	#N/A	#N/A	#N/A	F65	R49	F6	R10
Empty_extraction	runBE10	#N/A	#N/A	#N/A	#N/A	#N/A	F71	R43	F12	R4
Empty_extraction	runBE10	#N/A	#N/A	#N/A	#N/A	#N/A	F64	R40	F5	R1
PCR_empty_control	runBE10	#N/A	#N/A	#N/A	#N/A	#N/A	F66	R50	F7	R11
PCR_empty_control	runBE10	#N/A	#N/A	#N/A	#N/A	#N/A	F69	R45	F10	R6
